# Supplementary material for: CuentosIE: can a chatbot about “tales with a message” help to teach emotional intelligence?
Source: PeerJ Comput Sci. 2024 Feb 29;10:e1866. doi: 10.7717/peerj-cs.1866 (PMC10909183; doi:10.7717/peerj-cs.1866)
Supplement: Supplemental Information 3 — All the XML data obtained from the experiments. [file peerj-cs-10-1866-s003.xlsx]

## Sheet: TestBaron
Results of users who have taken the Baron test
Date	P1	P2	P3	P4	P5	P6	P7	P8	P9	P10	P11	P12	P13	P14	P15	P16	P17	P18	P19	P20	P21	P22	P23	P24	P25	P26	P27	P28	P29	P30	P31	P32	P33	P34	P35	P36	P37	P38	P39	P40	P41	P42	P43	P44	P45	P46	P47	P48	P49
2021-06-07	4	3	2	4	3	2	3	2	2	3	2	2	4	4	2	2	2	2	3	4	1	2	3	3	3	2	2	2	3	2	2	3	4	2	2	3	2	3	2	3	3	2	2	2	3	2	3	2	2
2021-06-07	4	2	1	2	3	2	1	4	3	3	4	3	3	2	4	2	1	3	4	3	2	3	3	4	3	2	1	4	2	4	1	3	2	4	2	3	3	4	2	3	1	2	1	4	2	3	3	4	2
2021-06-07	4	3	3	4	3	2	1	2	4	2	3	3	3	3	3	2	1	3	4	4	3	2	4	4	2	3	2	1	3	2	2	3	3	2	3	2	1	3	2	4	4	3	1	1	2	2	4	3	3
2021-06-07	4	3	3	4	2	1	3	2	4	2	4	3	4	4	3	3	3	2	3	4	1	3	4	3	2	1	3	2	3	4	3	4	3	3	2	3	1	3	2	4	3	3	2	3	2	2	4	3	1
2021-06-07	4	2	3	4	3	2	1	2	2	2	3	3	2	4	4	3	2	2	3	4	1	3	4	4	2	3	2	2	3	3	2	3	3	4	3	3	1	3	2	3	3	1	2	3	4	2	4	3	2
2021-06-07	4	3	2	3	3	1	2	1	4	3	3	3	3	3	2	3	3	3	4	4	1	3	4	4	2	1	3	3	4	3	3	3	3	3	2	2	1	2	3	4	3	1	3	3	3	2	4	3	2
2021-06-07	4	3	2	2	4	3	1	2	2	3	3	3	2	4	3	3	1	3	2	3	1	3	1	4	2	3	3	1	2	3	1	3	3	3	3	3	3	3	2	2	3	1	1	3	3	2	2	2	2
2021-06-07	4	3	2	2	4	3	1	2	2	3	3	3	2	4	3	3	1	3	2	3	1	3	1	4	2	3	3	1	2	3	1	3	3	3	3	3	3	3	2	2	3	1	1	3	3	2	2	2	2
2021-06-07	4	3	4	3	2	1	2	3	2	3	4	3	3	4	4	3	2	3	3	3	1	3	3	4	3	2	2	1	3	3	2	3	2	3	2	2	3	3	2	2	2	2	2	3	3	2	2	3	1
2021-06-07	3	3	2	2	3	3	1	2	3	3	2	1	2	3	3	4	1	1	2	4	2	3	2	3	4	2	1	4	2	3	1	3	3	2	2	2	2	3	1	2	3	2	1	2	3	3	2	3	3
2021-06-07	4	4	3	4	4	3	2	3	4	3	2	4	2	4	4	3	3	2	3	4	2	3	4	4	4	2	2	2	3	4	2	4	4	4	3	4	1	4	3	4	4	3	2	4	4	1	4	4	1
2021-06-07	4	2	2	4	4	3	3	1	1	2	1	4	2	35	4	4	3	3	4	4	1	3	4	4	4	3	1	3	4	3	4	2	3	2	3	4	1	4	3	4	1	3	3	4	3	1	1	3	4
2021-06-07	4	4	2	2	3	2	2	2	4	3	3	4	3	4	4	4	2	2	2	4	2	2	4	4	4	2	1	3	3	2	1	1	4	4	2	4	3	3	1	3	1	1	2	3	4	4	2	2	1
2021-06-07	4	3	3	3	4	3	3	1	3	3	4	1	2	4	4	3	3	3	4	4	2	3	4	4	3	3	2	3	3	4	4	4	3	3	2	3	1	3	4	3	3	1	3	4	4	2	4	4	2
2021-06-07	4	3	3	4	3	2	4	3	4	2	4	3	2	4	3	3	3	3	4	4	1	3	4	4	3	1	4	3	3	3	3	4	3	4	2	4	1	3	4	4	4	2	3	3	4	2	4	4	2
2021-06-07	4	4	2	3	4	2	3	1	3	3	3	2	3	4	4	2	2	3	4	4	2	3	4	4	4	2	1	3	2	4	2	3	4	4	2	2	1	4	2	3	4	4	2	3	4	2	3	4	4
2021-06-07	3	3	2	3	3	2	2	2	2	2	2	3	3	3	3	3	2	2	4	3	2	3	4	3	2	2	2	3	3	1	2	2	2	3	2	3	1	1	2	3	3	2	2	2	3	2	3	2	3
2021-06-07	4	4	1	2	3	4	2	1	4	3	3	3	3	4	4	3	2	2	3	3	3	3	3	1	3	3	3	3	3	3	2	3	4	4	4	4	4	3	2	4	2	1	3	3	2	4	4	3	2
2021-06-07	4	4	4	4	4	4	4	4	4	4	4	4	4	4	2	2	1	3	4	4	3	2	4	3	4	3	3	4	4	4	4	4	4	4	3	4	1	4	3	2	3	1	2	4	4	4	4	4	4
2021-06-07	4	2	2	3	2	2	2	1	3	2	2	2	3	2	2	3	2	1	3	4	2	4	4	3	3	3	3	2	2	2	2	4	2	3	3	2	3	3	2	3	2	3	2	2	2	3	3	2	3
2021-06-07	4	3	3	3	3	2	2	3	3	3	2	3	4	3	4	1	1	1	4	3	4	4	3	3	2	1	1	1	4	4	3	4	2	4	3	4	3	4	4	4	3	3	1	4	2	1	4	3	1
2021-06-07	4	2	3	2	4	3	2	2	4	3	4	3	2	2	2	3	1	4	3	4	2	2	3	4	3	1	2	3	1	2	2	3	4	3	2	4	2	2	3	4	3	1	2	2	3	2	4	3	2
2021-06-07	3	3	2	2	3	1	1	1	2	3	2	3	2	4	3	3	2	2	2	3	2	3	3	4	2	2	2	3	2	3	1	4	3	2	1	4	2	3	3	2	3	1	1	2	3	2	1	2	1
2021-06-07	3	4	2	3	4	3	2	3	3	2	3	3	3	4	2	2	2	4	4	4	2	3	3	4	4	1	3	4	3	2	3	3	3	4	1	3	2	4	3	4	2	2	2	4	4	2	4	3	1
2021-06-07	3	2	2	3	3	1	1	2	4	1	3	3	3	4	4	3	2	3	3	3	1	2	4	4	4	2	2	2	3	2	2	4	3	2	1	3	4	3	4	4	2	1	4	4	4	2	4	4	1
2021-06-07	3	4	2	4	4	3	4	1	4	4	2	3	1	3	4	2	1	1	1	2	1	3	2	4	3	4	1	4	1	3	1	3	2	3	4	3	1	3	1	1	1	1	1	3	2	4	1	3	1
2021-06-07	3	3	3	3	4	4	2	3	2	3	2	2	3	3	4	2	1	3	2	3	4	3	3	3	4	3	1	1	3	3	1	3	2	4	4	4	3	3	2	2	4	2	1	3	3	3	1	3	4
2021-06-07	3	3	3	3	4	3	1	3	1	3	3	2	3	3	4	3	1	3	3	4	3	2	3	3	3	3	1	4	3	2	3	4	3	2	4	3	2	3	1	1	4	2	1	3	4	3	2	3	3
2021-06-07	2	3	2	2	2	2	2	2	2	3	2	3	2	3	2	3	2	3	2	3	2	3	2	2	3	2	3	4	2	3	2	2	3	3	2	2	2	3	2	2	3	1	2	3	2	2	2	2	3
2021-06-07	3	3	4	3	3	1	3	2	3	3	4	2	3	4	2	3	2	3	3	3	2	3	4	1	4	1	2	1	3	2	2	3	2	2	3	2	1	2	2	2	2	2	2	2	2	2	2	2	3
2021-06-07	4	3	3	3	4	2	2	3	2	2	4	2	2	3	3	4	2	2	3	4	2	3	3	3	3	2	2	3	2	3	2	3	3	3	2	3	1	3	3	4	4	2	2	3	3	2	4	4	2
2021-06-07	4	2	4	3	2	1	2	1	2	2	4	4	3	4	4	4	2	1	4	4	1	4	4	2	4	1	4	1	4	4	4	4	4	4	1	3	1	4	3	4	4	2	2	4	4	2	4	4	1
2021-06-07	4	4	3	3	4	1	2	3	3	4	4	2	4	4	2	3	2	4	3	4	1	3	3	4	4	1	2	3	3	4	2	4	4	4	1	3	1	4	4	3	2	1	2	4	4	2	4	4	1
2021-06-07	3	3	2	3	4	3	2	1	1	3	2	3	2	4	3	2	2	2	2	4	2	2	4	4	3	3	2	2	2	2	2	3	3	3	2	3	3	3	2	2	3	1	2	2	4	2	3	3	4
2021-06-07	3	3	4	3	3	2	2	2	3	3	3	2	3	4	2	3	2	3	4	4	2	3	4	1	3	2	3	3	3	2	3	4	3	2	2	3	2	3	4	4	3	2	2	2	3	4	4	3	1
2021-06-07	3	3	2	3	2	2	1	3	2	1	4	3	2	4	3	3	1	3	4	3	1	3	1	3	3	2	4	4	2	2	1	3	2	3	3	3	2	2	1	3	1	2	1	3	3	2	3	3	1
2021-06-07	4	3	2	3	3	2	1	2	3	3	2	2	3	3	3	4	2	2	4	2	2	3	3	3	2	2	2	3	3	3	2	4	2	3	3	2	1	3	2	3	4	2	1	3	2	2	3	3	3
2021-06-07	4	3	2	3	3	1	2	2	3	3	3	3	3	4	3	3	2	4	3	4	2	2	3	4	3	2	2	4	3	2	3	2	3	3	2	3	2	3	3	3	2	1	3	3	3	2	3	2	3
2021-06-07	4	3	2	2	4	4	2	2	2	2	3	2	2	4	3	4	2	3	3	3	2	3	4	4	4	2	2	3	2	3	2	3	4	4	4	4	2	4	3	3	3	1	1	3	3	3	3	3	1
2021-06-07	4	3	3	2	3	2	2	1	4	3	2	3	2	4	4	4	2	2	1	3	1	3	3	3	4	1	3	3	1	3	3	2	3	3	1	3	4	3	4	4	2	2	2	3	3	1	1	3	3
2021-06-07	4	3	2	3	2	3	2	2	2	2	3	1	2	4	3	3	2	2	3	4	2	4	4	3	3	2	3	2	2	3	2	4	3	3	2	3	2	3	3	3	2	1	2	3	2	2	3	3	1
2021-06-07	4	3	3	4	3	1	2	2	2	2	1	2	2	1	1	2	2	1	1	1	3	1	1	4	2	2	2	3	1	2	3	1	1	1	3	2	4	1	2	1	2	4	3	1	1	2	1	1	3
2021-06-07	4	3	2	4	4	1	4	2	4	4	4	3	3	4	2	4	4	1	4	4	2	3	4	3	3	2	1	1	4	3	4	4	3	4	2	3	1	4	3	4	4	2	3	4	3	1	4	4	2
2021-06-07	3	2	2	4	3	2	2	3	3	2	3	2	3	3	2	3	3	3	4	4	2	2	4	3	3	2	3	3	4	2	2	4	3	3	2	2	2	2	3	4	3	2	2	2	3	2	4	2	2
2021-06-07	4	3	2	3	4	1	1	1	2	3	3	1	3	4	3	4	1	2	3	2	3	4	4	4	2	2	2	4	2	3	1	3	4	3	2	4	2	3	3	2	3	1	1	1	4	2	4	4	2
2021-06-07	4	2	2	3	3	2	4	3	3	2	3	2	3	3	4	2	2	1	3	2	2	2	3	3	4	2	1	2	1	2	2	4	3	2	3	2	2	3	3	3	3	2	1	2	3	3	2	3	3
2021-06-07	3	3	1	3	2	4	3	2	2	3	2	2	2	2	4	3	4	1	1	4	4	2	4	2	3	4	1	2	1	2	4	3	2	2	4	2	3	3	3	4	2	1	3	2	4	4	2	3	4
2021-06-07	4	3	4	4	3	2	3	2	3	3	3	2	2	4	2	3	3	2	3	4	2	3	4	1	3	2	2	2	3	2	2	4	4	3	2	3	1	2	2	3	4	2	2	3	2	2	4	3	2
2021-06-07	4	3	2	4	4	2	3	3	3	3	3	4	4	4	3	1	3	4	4	4	2	3	4	3	4	2	1	2	4	4	3	4	3	4	1	3	1	3	3	4	4	3	3	3	4	1	4	4	2
2021-06-07	4	3	2	4	3	3	2	2	3	4	3	3	3	3	3	2	2	2	2	4	2	3	3	3	3	3	2	2	3	4	2	3	3	3	3	3	2	3	3	3	4	3	3	3	4	2	2	2	3
2021-06-07	4	2	2	3	3	2	2	2	3	2	3	2	3	3	3	2	2	3	3	4	2	3	3	3	2	2	2	3	3	3	2	3	3	3	3	3	2	2	2	3	4	3	2	2	3	2	4	3	3
2021-06-07	4	3	3	2	4	1	2	2	3	3	4	4	4	4	3	4	2	3	3	4	1	3	4	4	3	2	2	4	3	3	2	2	3	4	1	3	4	3	4	4	3	3	2	4	4	2	3	4	1
2021-06-07	3	3	2	2	2	2	3	2	3	3	2	1	2	2	2	3	3	1	2	4	3	3	2	2	3	2	1	2	2	3	2	4	3	2	2	2	2	2	1	3	3	3	2	2	3	1	3	2	3
2021-06-07	3	3	2	2	3	3	4	2	1	3	3	1	1	3	3	2	1	2	2	4	2	3	2	4	2	2	4	4	2	3	1	2	3	3	2	3	3	3	2	2	2	2	1	3	4	2	2	3	1
2021-06-07	3	4	1	2	4	4	3	3	1	3	1	2	2	4	4	3	3	3	2	4	3	3	3	4	3	4	2	3	1	2	3	3	3	3	4	4	3	2	1	2	3	1	3	2	4	1	2	3	3
2021-06-07	4	2	3	4	4	4	2	3	4	2	4	3	2	4	2	3	2	2	1	4	1	2	4	4	4	2	2	3	2	2	2	4	4	3	1	4	1	3	4	4	2	1	2	3	3	1	4	3	2
2021-06-07	4	3	2	3	3	2	3	1	3	3	3	2	2	3	3	2	2	3	2	4	2	2	4	3	3	2	1	2	3	3	3	3	2	2	3	4	2	3	2	3	3	2	2	3	3	2	3	2	3
2021-06-07	4	3	2	4	4	3	4	3	4	3	3	2	2	4	3	4	3	3	4	4	2	4	4	4	4	1	2	4	3	4	3	4	3	4	3	1	1	4	4	4	4	2	3	3	4	1	4	3	2
2021-06-07	3	2	1	3	2	2	2	2	2	3	2	3	3	2	3	3	2	2	3	2	2	3	4	2	4	3	2	2	3	3	2	3	2	3	2	2	1	3	2	3	2	2	2	3	2	1	3	3	3
2021-06-07	4	3	2	3	4	1	1	3	4	2	3	2	2	4	2	3	1	3	3	4	2	2	2	3	3	2	2	1	3	2	1	3	3	2	2	2	2	3	2	3	3	2	1	3	4	1	3	2	1
2021-06-07	4	3	2	3	4	3	2	1	2	2	2	2	3	4	4	3	2	3	3	3	2	2	4	3	3	2	2	3	3	2	2	3	4	2	3	2	2	2	2	2	2	1	2	2	2	1	2	2	1
2021-06-07	4	3	1	2	3	4	1	2	2	3	1	2	2	2	4	1	1	2	4	4	2	2	3	3	3	3	3	4	2	2	1	2	3	2	4	3	3	2	2	2	1	3	1	3	3	2	2	1	4
2021-06-07	3	2	1	3	3	2	4	2	2	2	2	2	2	2	3	1	4	2	2	4	3	1	3	2	2	2	3	1	2	1	4	2	3	1	3	2	2	1	2	2	3	1	4	1	2	2	2	1	2
2021-06-07	4	2	3	4	4	2	2	2	3	3	4	3	3	4	2	4	3	4	4	4	1	2	4	4	4	2	3	2	3	3	3	4	4	3	1	4	1	3	4	4	2	1	2	4	4	1	4	3	2
2021-06-07	3	3	2	3	3	2	2	2	3	3	3	3	4	4	3	3	3	2	4	4	2	3	3	2	3	2	3	2	4	3	3	4	4	4	3	4	2	4	1	3	3	3	3	4	3	3	3	3	1
2021-06-07	3	3	4	3	3	3	2	2	3	2	2	2	4	4	3	2	2	3	4	4	2	3	3	3	2	2	2	3	3	2	2	3	4	2	2	3	2	2	2	3	4	3	2	2	4	3	4	2	2
2021-06-07	3	3	4	3	3	3	2	2	3	2	2	2	4	4	3	2	2	3	4	4	2	3	3	3	2	2	2	3	3	2	2	3	4	2	2	3	2	2	2	3	4	3	2	2	4	3	4	2	2
2021-06-07	4	3	3	3	4	2	2	3	3	3	3	2	4	4	2	4	2	3	3	4	1	3	4	4	3	1	3	4	3	3	2	4	3	3	1	4	1	4	4	3	3	3	2	4	4	1	4	3	1
2021-06-07	4	3	3	2	4	2	1	2	2	2	3	3	2	3	3	3	1	2	3	4	2	3	3	4	3	2	2	4	3	2	2	3	2	2	2	3	2	2	2	2	3	1	1	3	4	2	2	2	2
2021-06-07	4	2	2	3	3	3	2	2	2	2	3	3	2	3	4	3	2	2	2	3	1	3	3	3	3	2	2	4	2	2	2	3	3	3	2	2	2	3	2	2	3	1	2	3	3	2	2	3	2
2021-06-07	4	3	3	4	3	1	2	3	3	3	3	2	3	4	1	3	2	3	3	4	1	4	4	3	3	2	3	1	3	4	3	3	4	4	2	3	2	4	2	3	3	2	2	4	3	1	3	4	1
2021-06-07	3	3	2	4	4	2	1	2	4	3	3	4	3	4	2	4	1	3	3	3	2	4	4	4	2	3	1	4	3	4	1	3	3	4	3	3	1	4	2	4	2	2	1	4	4	2	4	4	2
2021-06-07	4	2	2	3	3	2	2	2	2	2	2	3	2	3	2	3	1	3	2	4	2	3	3	3	3	2	2	4	2	3	1	3	3	3	2	3	2	2	2	3	3	2	1	3	3	2	3	3	2
2021-06-07	4	4	3	4	4	2	1	3	1	4	3	3	3	4	3	2	1	3	3	4	1	1	4	4	4	3	3	4	3	1	1	4	3	3	3	4	2	2	3	1	3	1	1	4	4	3	1	1	1
2021-06-07	4	3	1	4	3	1	3	2	2	3	3	3	3	4	3	3	2	3	4	4	3	3	2	4	3	2	2	3	4	2	2	3	3	3	1	2	1	3	2	2	3	2	2	2	3	1	2	3	2
2021-06-07	4	3	1	3	3	3	2	2	2	2	2	3	3	3	4	2	2	2	3	4	1	3	4	3	3	4	1	2	3	2	2	3	3	2	3	3	1	2	2	2	3	2	2	2	2	2	2	3	3
2021-06-07	3	3	2	2	2	4	1	1	2	3	2	2	3	2	4	3	1	1	2	2	3	3	1	3	2	2	1	4	2	2	2	2	2	3	4	1	2	3	1	2	1	1	1	2	2	3	4	3	4
2021-06-07	4	2	3	3	3	2	1	1	1	3	3	3	2	3	3	2	2	3	2	3	2	4	3	3	3	3	2	3	2	3	2	3	4	3	1	3	2	4	1	2	3	1	2	3	2	2	2	3	1
2021-06-07	4	2	1	3	3	3	1	1	2	2	2	3	2	2	3	2	1	2	2	3	3	3	4	2	2	3	2	1	4	2	1	4	1	3	4	1	2	1	2	4	3	3	1	1	2	1	3	2	4
2021-06-07	4	2	2	3	3	1	3	3	4	2	3	2	2	4	2	2	2	2	4	4	2	2	4	1	2	2	2	3	3	3	1	4	3	2	2	2	1	2	1	4	2	2	2	3	3	2	4	3	2
2021-06-07	4	2	4	3	4	4	3	3	3	3	3	3	3	3	2	3	2	3	3	4	2	2	4	3	2	3	2	2	3	3	3	2	3	3	4	3	1	2	3	3	3	2	2	2	3	1	4	2	1
2021-06-07	4	3	1	4	3	4	4	1	4	3	2	1	3	4	4	3	3	1	4	4	3	3	4	4	2	3	2	2	4	3	3	4	4	2	3	4	1	4	2	4	4	2	4	3	4	2	4	4	3
2021-06-07	4	3	3	4	3	2	3	3	4	3	3	2	3	3	3	2	3	3	3	4	2	3	3	2	3	2	2	2	3	2	2	3	3	2	2	3	3	2	3	4	3	3	2	3	3	2	4	3	3
2021-06-07	4	3	2	4	4	1	2	3	3	2	4	3	2	4	2	3	2	4	3	4	1	3	3	4	3	1	3	4	3	3	2	3	4	3	1	3	2	3	3	4	4	2	1	2	4	1	4	3	3
2021-06-07	3	3	2	3	3	2	3	3	4	3	3	4	4	4	2	4	4	3	4	4	2	3	3	1	4	1	3	3	4	3	3	4	3	4	2	4	2	4	4	4	4	3	3	4	4	2	4	4	2
2021-06-07	4	2	1	3	3	2	1	3	3	2	3	3	3	2	2	3	1	2	3	4	2	3	3	3	3	2	2	4	3	2	2	3	3	3	2	3	1	3	1	3	3	3	1	2	2	1	3	3	3
2021-06-07	4	3	2	4	4	2	1	2	4	3	2	3	3	4	4	4	2	4	4	4	2	4	3	4	3	1	1	2	3	3	2	3	3	4	3	4	2	4	3	3	2	1	2	4	4	1	3	4	2
2021-06-07	4	2	3	4	2	3	2	3	3	2	2	3	3	3	2	4	2	3	4	3	1	4	3	4	4	2	2	2	4	3	2	3	4	3	3	3	1	4	3	4	3	2	2	3	3	2	4	3	2
2021-06-07	4	2	3	4	4	2	2	3	4	3	2	1	3	4	3	3	2	3	3	4	2	3	4	1	4	1	2	2	3	3	2	4	3	3	1	4	1	2	4	4	4	2	2	2	4	1	4	3	3
2021-06-07	4	2	2	3	3	2	3	2	2	2	2	3	2	3	2	3	2	3	4	4	2	2	4	2	4	2	3	2	4	3	2	4	3	3	3	3	2	4	2	1	2	1	1	3	3	3	2	4	3
2021-06-07	4	3	3	3	3	2	1	3	3	3	3	4	3	4	4	2	3	2	4	3	2	3	4	3	2	3	3	4	4	2	1	4	2	4	4	2	3	4	2	4	3	2	1	4	3	1	3	3	4
2021-06-07	4	3	1	4	3	4	1	3	3	3	2	3	3	4	4	2	1	3	3	4	2	2	4	4	3	3	3	4	3	3	1	4	4	2	4	4	1	2	3	4	2	1	1	3	4	2	4	3	1
2021-06-07	4	3	3	2	3	2	3	3	3	3	4	3	2	4	4	2	2	2	3	3	2	3	3	3	3	2	3	3	3	2	2	1	4	2	1	4	3	2	4	3	1	1	3	3	4	2	3	2	2
2021-06-07	4	2	2	3	3	3	3	2	3	3	2	4	3	3	4	3	2	3	4	4	1	3	3	3	3	2	2	4	3	4	2	4	3	3	2	4	1	3	2	4	3	2	2	4	3	2	3	3	3
2021-06-07	4	3	3	4	2	1	2	3	4	2	3	2	3	3	3	3	2	2	4	4	2	3	4	3	3	2	2	2	4	3	2	4	3	3	2	2	1	3	2	4	2	3	2	3	2	2	4	3	2
2021-06-07	4	2	1	3	3	4	4	1	2	3	4	4	2	4	4	4	3	4	3	4	4	2	3	3	3	2	3	1	2	2	4	4	4	3	2	4	1	4	4	3	4	1	4	4	4	1	4	4	4
2021-06-07	4	2	2	4	3	1	3	2	2	3	4	1	4	3	4	3	2	2	2	4	2	3	2	2	2	4	1	3	2	2	2	3	2	2	2	2	1	3	3	3	4	2	4	2	2	4	2	2	3
2021-06-07	4	3	1	4	4	4	4	1	4	3	2	4	1	2	2	3	2	1	4	4	4	2	4	3	4	2	3	4	3	3	3	4	3	3	3	4	1	4	3	4	4	3	1	3	2	3	4	4	4
2021-06-07	4	3	1	4	2	4	1	2	3	3	4	1	4	2	4	4	1	1	4	2	1	4	3	3	4	2	1	1	4	4	1	2	4	4	4	1	2	2	2	4	3	4	1	4	3	1	4	4	3
2021-06-07	4	2	1	3	23	4	1	2	1	2	1	4	2	2	1	2	4	2	1	4	4	3	2	2	3	4	1	1	2	3	1	1	4	2	4	2	2	2	1	1	2	3	3	3	2	2	4	1	4
2021-06-07	4	2	3	4	4	3	1	3	3	3	4	2	2	4	1	4	2	3	4	4	2	4	4	4	4	1	2	4	3	4	3	4	4	3	2	4	1	4	2	3	4	1	2	2	4	3	4	3	2
2021-06-07	3	3	2	3	3	4	3	2	3	3	3	2	3	3	3	3	2	3	3	4	2	3	3	3	2	2	3	2	3	3	2	3	3	4	2	3	3	3	3	3	2	1	2	3	2	3	3	2	2
2021-06-07	3	3	2	2	3	2	1	2	2	3	3	2	2	3	3	1	1	3	2	2	2	2	2	1	2	2	4	3	2	2	2	3	2	2	3	3	2	2	3	1	1	1	2	1	3	2	1	2	2
2021-06-07	4	3	4	4	4	1	2	3	2	4	4	2	3	4	2	1	2	4	4	4	2	3	4	3	4	1	2	2	3	3	4	3	3	3	2	4	1	3	2	3	4	3	2	3	4	1	4	3	2
2021-06-07	2	1	3	2	3	3	1	3	2	1	2	1	2	4	3	3	2	2	2	3	1	1	1	4	2	1	3	4	2	2	2	1	1	1	3	3	2	2	2	2	2	1	1	1	4	2	1	1	1
2021-06-07	4	4	2	2	4	2	1	3	3	3	1	4	1	3	2	1	1	1	1	4	2	1	2	4	2	4	3	4	1	1	1	4	2	2	2	2	4	1	1	1	4	2	1	1	4	2	1	1	2
2021-06-07	3	3	1	2	4	4	2	2	2	3	2	2	3	3	3	2	2	2	3	4	1	2	3	4	1	2	2	2	3	3	2	3	3	3	4	2	3	3	2	2	4	2	2	2	3	2	2	3	3
2021-06-07	4	4	2	2	3	2	2	2	3	3	3	4	2	3	3	4	2	2	2	4	2	4	2	3	3	2	3	2	2	4	1	4	4	4	2	3	2	2	2	2	3	2	3	4	2	3	2	3	2
2021-06-07	4	3	3	3	2	1	2	1	3	3	3	1	2	3	3	2	2	2	2	3	1	2	2	2	2	2	3	2	2	2	2	2	2	2	2	2	1	2	3	3	2	2	2	2	2	2	2	2	1
2021-06-07	4	3	2	3	3	2	3	2	3	2	3	2	2	3	4	3	3	3	4	4	2	2	4	3	2	3	3	2	4	2	3	4	2	2	2	3	2	2	2	3	2	1	2	2	2	1	3	2	2
[truncated: 12 more columns]

## Sheet: TestMillon
Results of users who have taken the Million test
Date	P1	P2	P3	P4	P5	P6	P7	P8	P9	P10	P11	P12	P13	P14	P15	P16	P17	P18	P19	P20	P21	P22	P23	P24	P25	P26	P27	P28	P29	P30	P31	P32	P33	P34	P35	P36	P37	P38	P39	P40	P41	P42	P43	P44	P45	P46	P47	P48	P49
2021-04-26	2	1	2	1	2	1	2	2	1	1	2	2	1	2	1	2	2	2	2	1	2	2	2	2	1	2	2	2	2	2	2	2	2	2	2	1	2	1	2	2	2	2	2	2	1	1	2	2	1
2021-04-26	2	1	2	1	1	1	2	1	1	1	2	2	2	2	2	2	2	2	2	2	2	2	1	1	2	2	1	2	2	2	2	2	2	2	2	1	2	2	1	2	2	2	2	1	1	2	2	2	1
2021-04-26	2	1	2	1	2	2	2	1	1	1	1	2	2	2	2	2	2	1	1	1	1	1	2	2	1	1	2	2	1	2	1	1	2	1	2	2	1	1	2	2	2	1	1	1	1	1	2	2	2
2021-04-26	2	1	2	2	1	1	2	1	2	1	2	2	2	2	2	2	2	2	2	2	2	1	2	2	1	2	1	2	2	1	2	2	2	2	2	2	2	2	1	2	1	2	2	2	1	2	2	2	2
2021-04-26	2	1	2	2	1	1	2	1	1	1	2	2	1	2	1	2	1	2	2	2	2	2	1	2	1	2	1	2	2	2	1	2	2	2	2	1	2	2	1	2	1	2	2	2	1	1	2	2	2
2021-04-26	2	2	2	1	1	1	2	1	1	2	1	2	1	2	2	2	2	2	1	1	2	2	2	2	1	1	1	2	1	2	1	1	2	1	1	1	2	1	1	2	1	1	2	2	1	1	2	2	2
2021-04-26	2	1	1	1	1	1	1	1	1	1	1	2	1	1	2	1	2	2	1	1	2	1	1	2	1	1	1	2	1	2	1	2	2	2	1	1	2	1	2	2	2	1	2	1	1	1	1	2	2
2021-04-26	2	2	2	2	1	2	1	1	1	2	1	2	1	1	1	1	1	2	2	1	2	2	1	2	2	1	2	2	1	2	1	1	2	2	1	2	2	1	2	2	2	1	2	2	1	2	2	1	2
2021-04-26	2	2	2	1	2	2	2	2	1	1	2	1	2	2	1	2	2	1	2	1	1	2	2	2	1	2	2	2	2	1	2	2	2	1	2	2	2	2	1	2	1	2	2	1	2	1	1	2	2
2021-04-26	2	1	1	1	1	2	2	1	1	1	2	1	2	2	1	2	2	2	1	2	1	2	2	1	2	2	1	2	2	2	2	2	2	2	2	1	2	2	1	2	2	2	2	2	1	2	2	2	1
2021-04-26	2	1	2	1	1	1	2	1	1	1	2	2	2	2	1	2	2	2	2	2	1	2	2	2	2	2	1	2	2	2	1	2	2	2	2	1	1	2	1	2	1	2	2	1	1	2	2	2	2
2021-04-26	1	2	1	2	2	1	1	1	1	1	1	2	1	2	1	2	1	1	2	1	2	1	1	2	2	2	1	2	2	2	1	2	2	2	1	1	2	2	1	2	1	2	2	2	1	2	2	2	2
2021-04-26	2	1	2	1	2	1	2	2	1	1	1	2	2	2	2	2	2	1	2	2	1	2	2	1	2	2	1	2	1	2	2	2	2	2	2	2	2	2	1	2	1	2	2	1	1	2	2	2	1
2021-04-26	2	2	2	2	2	1	1	2	2	1	1	2	2	2	1	2	2	1	2	2	1	2	2	1	2	1	1	2	2	2	2	2	2	2	2	2	2	2	1	2	2	2	2	1	1	2	2	2	2
2021-04-26	1	2	2	1	2	1	1	1	1	1	1	2	2	1	1	2	2	2	2	1	2	2	1	2	1	2	1	2	1	2	2	2	2	2	1	2	2	1	1	2	2	2	2	2	1	2	2	1	2
2021-04-26	2	2	2	1	1	1	2	1	1	2	1	2	2	2	1	2	1	1	1	2	2	2	1	2	2	1	1	2	1	2	1	1	2	1	1	2	2	1	2	2	2	2	1	2	1	2	2	1	2
2021-04-26	2	1	2	1	1	1	2	1	1	1	2	2	2	1	2	2	1	2	1	2	2	2	1	1	2	2	1	2	2	2	2	2	2	2	2	2	1	2	1	2	1	2	2	2	2	2	2	2	2
2021-04-26	2	2	1	2	2	1	2	2	1	1	2	2	2	2	1	2	2	1	2	1	2	1	2	2	1	2	1	2	2	2	2	2	2	1	2	1	2	1	1	2	1	1	2	1	1	1	2	2	2
2021-04-26	1	1	2	1	2	1	2	1	1	1	2	2	2	2	1	2	1	1	2	2	2	2	1	2	1	2	1	2	2	2	2	2	2	1	2	2	2	1	1	2	2	1	2	1	1	1	1	2	2
2021-04-26	2	2	1	2	1	1	2	2	1	2	1	2	1	1	1	1	2	1	1	1	1	2	1	2	1	1	1	1	1	1	1	2	1	1	2	2	2	1	2	2	2	1	2	1	1	1	1	1	2
2021-04-26	2	2	2	2	1	2	2	1	1	2	2	2	2	2	1	2	2	1	2	2	1	2	2	2	1	1	1	2	2	2	1	2	2	1	2	2	2	2	1	2	1	1	1	1	1	2	1	1	2
2021-04-26	2	2	2	1	2	2	1	2	2	1	2	2	2	2	2	2	1	1	2	1	2	2	2	1	1	2	1	1	2	1	2	2	2	1	2	2	2	2	2	2	2	2	1	1	2	2	1	2	2
2021-04-26	2	2	2	1	1	1	2	2	2	1	1	2	2	2	1	2	2	1	2	1	1	2	2	1	1	2	1	2	2	1	2	2	2	1	2	2	2	1	2	2	2	2	1	1	2	1	2	2	2
2021-04-26	2	1	2	1	1	1	2	1	1	1	2	2	2	2	1	2	2	2	2	2	2	2	1	1	2	2	1	2	2	2	2	2	2	2	2	1	2	2	2	2	1	2	2	2	1	2	2	2	2
2021-04-26	2	1	2	1	1	1	2	1	1	1	1	2	2	2	1	2	2	2	2	2	1	2	2	2	2	2	1	2	1	2	2	2	2	2	2	1	2	1	1	2	1	2	2	2	1	1	2	1	2
2021-04-26	2	2	2	1	1	1	2	2	1	2	1	2	2	2	1	2	2	2	1	1	2	2	2	2	1	1	1	2	1	2	1	1	1	1	1	1	2	2	2	2	1	1	1	2	1	1	1	1	2
2021-04-26	2	1	1	1	1	1	2	1	1	1	1	2	2	2	1	2	2	1	1	1	2	2	1	1	1	2	2	2	2	2	1	2	2	1	2	1	2	1	1	2	2	2	2	2	1	2	2	2	2
2021-04-26	2	1	1	1	1	1	2	1	1	1	1	2	2	1	2	2	2	1	2	1	2	1	2	1	1	1	1	2	1	1	1	2	2	1	2	2	2	1	1	2	1	2	2	1	1	2	1	1	2
2021-04-26	1	2	2	1	1	1	2	2	1	2	1	1	2	2	1	2	1	1	2	1	2	2	1	2	1	1	1	2	1	2	1	2	2	1	2	2	2	1	2	2	1	1	2	1	1	2	1	2	2
2021-04-26	2	2	2	1	1	1	2	2	1	1	1	2	2	2	1	2	2	2	2	1	2	2	2	2	2	2	1	2	2	2	1	2	2	1	1	1	2	1	2	2	2	1	2	2	1	1	1	2	2
2021-04-26	2	2	2	1	2	1	1	1	2	1	2	2	2	2	2	2	1	1	1	2	1	1	2	1	2	2	1	2	2	2	2	2	2	2	2	1	2	2	2	2	1	1	2	1	1	2	2	2	2
2021-04-26	2	1	2	1	1	1	2	1	1	1	2	2	2	2	1	2	2	2	2	2	2	2	2	2	2	2	1	2	2	2	2	1	2	2	2	2	2	2	1	2	2	2	2	2	1	2	2	2	2
2021-04-26	2	2	1	1	1	2	2	1	2	1	2	2	2	2	1	2	2	1	2	2	1	2	2	2	2	1	1	2	2	2	1	2	2	2	2	1	1	2	2	2	1	1	2	1	1	1	2	2	2
2021-04-26	2	1	2	2	1	1	2	1	1	1	1	2	2	2	1	2	2	2	2	2	2	2	1	1	2	2	1	2	2	2	2	2	2	2	2	2	2	2	1	2	1	2	2	2	1	1	2	2	2
2021-04-26	2	1	2	2	1	1	2	1	1	1	2	2	2	2	1	2	2	1	2	2	2	2	1	2	2	2	1	2	2	2	1	2	2	2	2	2	2	2	1	2	2	2	2	2	1	2	2	2	2
2021-04-26	2	2	2	2	1	1	1	2	1	2	1	2	1	2	1	2	2	1	1	1	2	2	2	2	2	1	1	2	2	1	1	2	2	1	1	1	2	2	2	2	1	1	2	1	1	1	1	2	2
2021-04-26	2	1	2	2	1	1	1	1	1	1	2	2	1	2	1	2	2	2	2	1	2	2	1	2	1	2	1	2	2	2	2	2	2	2	2	2	2	1	1	2	1	2	2	1	1	2	2	2	1
2021-04-26	1	2	2	1	1	2	1	2	1	1	1	2	2	1	1	2	1	2	1	2	1	2	1	2	2	1	1	1	1	2	2	1	2	1	2	1	1	1	2	2	2	1	1	1	1	1	1	1	2
2021-04-26	2	1	2	2	1	1	2	1	1	1	2	1	2	2	1	2	1	1	2	1	2	2	2	1	2	2	1	2	2	2	2	2	2	2	2	2	2	2	2	2	2	2	2	2	1	2	2	2	2
2021-04-26	1	2	2	1	2	1	2	2	2	2	1	2	1	2	1	1	2	1	1	1	2	2	1	2	1	1	1	2	1	1	1	2	2	1	2	2	2	2	1	1	1	2	2	1	1	1	2	1	2
2021-04-26	2	1	2	1	1	1	2	1	1	1	1	2	2	2	1	2	2	2	2	2	2	2	2	2	2	2	1	2	2	2	2	2	2	2	2	2	1	1	1	2	1	2	2	2	1	2	2	1	2
2021-04-26	2	1	1	1	1	1	2	1	1	1	2	2	2	2	2	2	2	2	2	1	1	1	2	2	1	2	1	2	2	2	1	2	2	2	2	2	2	2	1	2	1	2	2	1	1	2	2	2	2
2021-04-26	2	2	2	1	1	1	2	1	1	1	2	2	2	2	1	2	2	2	2	2	2	2	2	2	2	2	1	2	2	2	2	2	2	2	2	2	2	2	2	2	2	1	2	2	1	2	2	2	2
2021-04-26	2	1	2	1	1	1	2	2	1	1	2	2	2	2	1	2	2	1	2	2	1	2	2	1	2	2	1	2	2	2	2	2	2	2	2	2	2	2	1	2	1	2	2	2	1	2	2	2	2
2021-04-26	2	2	1	1	1	2	1	1	1	2	2	1	1	1	2	1	2	2	2	1	2	2	2	1	1	2	1	2	2	2	1	2	2	1	1	1	2	1	1	2	2	2	1	2	1	2	1	2	2
2021-04-26	1	1	2	2	2	1	2	1	2	1	2	2	2	2	2	2	2	1	2	2	1	2	2	1	2	2	1	2	2	2	2	2	2	2	2	2	2	2	1	2	2	2	2	1	1	2	2	2	2
2021-04-26	2	2	2	2	1	1	2	2	1	1	1	2	2	1	1	2	2	2	2	2	1	2	1	2	1	2	1	2	1	2	1	2	2	1	2	2	2	2	1	2	1	2	2	2	1	2	2	2	2
2021-04-26	2	1	1	2	1	1	2	1	1	1	2	2	2	2	1	2	1	2	2	1	2	2	2	1	2	2	1	2	2	2	2	2	2	2	2	2	2	2	1	2	1	2	2	1	1	2	2	2	2
2021-04-26	2	1	2	2	1	1	2	1	1	1	1	2	2	2	1	2	2	1	2	2	2	1	2	1	2	2	1	2	2	2	2	2	2	2	2	2	2	2	1	2	2	2	2	2	1	2	2	1	2
2021-04-26	2	2	1	1	1	1	2	2	1	2	1	2	2	2	1	1	2	2	2	1	1	2	2	1	1	1	1	1	1	2	1	2	1	1	2	2	1	1	2	2	1	1	2	1	1	1	2	2	2
2021-04-26	2	2	2	1	1	1	1	1	1	2	1	2	2	2	1	2	2	1	1	1	1	2	2	2	1	1	1	2	1	2	1	2	2	1	2	2	2	1	2	2	2	1	2	1	1	1	2	2	2
2021-04-26	2	2	2	1	1	2	1	1	1	2	1	2	2	2	1	2	1	2	2	2	1	1	2	1	1	1	1	2	1	2	1	2	2	2	2	2	2	1	2	2	2	2	2	2	1	2	2	1	2
2021-04-26	2	1	2	1	1	1	1	1	1	1	1	2	2	1	1	1	1	1	2	2	1	2	2	2	2	1	1	2	1	2	2	2	1	2	1	2	1	2	1	2	1	1	2	1	2	1	2	1	2
2021-04-26	2	2	1	1	1	1	2	1	1	1	1	2	1	2	1	2	1	1	2	1	2	2	1	2	1	2	1	2	2	2	1	1	2	1	1	1	1	1	1	2	1	1	2	2	2	1	2	2	2
2021-04-26	2	2	2	1	1	1	1	1	2	1	1	2	2	2	1	2	2	2	2	1	1	2	2	1	1	1	1	2	2	2	2	1	2	1	2	1	2	2	1	2	2	2	2	2	1	2	1	2	2
2021-04-26	2	2	1	1	2	1	1	2	2	1	1	2	2	2	2	2	2	2	2	1	1	1	2	2	1	2	1	2	1	2	2	2	2	2	1	1	2	1	1	2	1	1	2	2	1	2	1	1	2
2021-04-26	2	2	2	1	1	1	1	1	1	2	1	2	1	2	1	1	2	1	2	1	1	2	1	2	1	1	1	2	1	2	1	2	2	2	1	1	2	1	2	2	2	2	2	2	1	1	2	2	2
2021-04-26	2	1	1	1	2	2	2	1	2	1	1	1	1	2	1	2	2	1	2	1	1	2	2	2	2	1	1	2	1	2	1	2	2	2	2	1	2	2	1	2	1	2	2	1	1	2	1	2	1
2021-04-26	2	1	2	2	1	1	2	1	1	1	1	2	2	2	2	2	2	1	2	2	2	2	2	1	2	2	1	2	2	2	2	2	2	2	2	2	2	2	1	2	2	1	2	2	2	2	2	1	2
2021-04-26	2	2	2	1	1	2	1	1	2	2	1	2	2	2	1	2	1	2	2	2	1	2	2	1	2	1	1	2	1	2	2	2	2	1	2	1	2	2	2	2	1	1	2	1	1	1	2	1	2
2021-04-26	2	1	2	2	1	1	2	1	1	1	2	1	2	2	1	2	2	1	2	1	2	2	1	2	1	1	1	2	2	2	1	2	2	1	2	1	2	1	1	2	2	1	2	2	1	1	1	2	2
2021-04-26	2	1	1	1	1	1	2	1	1	1	2	2	2	1	1	2	2	1	2	2	1	2	2	1	2	2	1	2	2	2	2	2	2	1	2	2	2	1	1	2	2	2	2	1	1	2	1	2	1
2021-04-26	1	1	2	2	1	1	2	1	1	1	1	2	2	2	1	2	2	1	2	1	1	1	1	1	2	2	1	2	1	2	2	2	2	2	2	1	1	2	1	2	2	2	2	1	1	2	2	1	1
2021-04-26	2	2	1	2	1	1	2	1	1	1	2	2	2	2	1	2	1	1	2	2	1	2	2	1	2	1	1	2	2	2	1	2	1	2	2	2	1	2	1	2	1	1	2	2	1	2	2	2	1
2021-04-26	2	1	2	1	1	1	2	2	1	2	2	2	2	2	1	2	2	2	2	1	2	2	1	1	2	1	1	2	1	2	1	2	2	2	1	1	1	1	1	2	2	1	2	2	1	1	2	2	2
2021-04-26	2	1	2	2	1	1	2	1	1	1	2	2	2	2	2	2	2	2	2	1	2	2	2	1	2	2	1	2	2	2	2	2	2	2	2	2	2	2	2	2	2	2	2	2	1	2	2	2	2
2021-04-26	2	2	2	2	2	2	1	1	2	1	2	2	2	2	2	2	2	1	2	2	2	1	2	1	2	2	1	2	2	1	2	2	2	2	2	2	2	1	2	1	2	2	2	2	2	2	2	2	1
2021-04-26	2	1	2	1	2	2	1	1	1	2	1	2	2	1	1	1	1	1	1	1	1	2	2	2	1	1	1	2	1	2	2	1	2	1	2	1	1	1	1	2	1	1	2	1	1	2	1	2	1
2021-04-26	1	2	1	2	1	2	1	1	1	1	2	2	1	2	2	2	2	2	2	2	2	1	1	2	1	2	1	1	2	2	2	2	2	1	1	2	2	2	1	2	1	1	1	1	1	1	2	2	2
2021-04-26	2	2	1	1	1	1	2	1	2	1	2	1	2	2	2	2	1	1	1	2	1	1	2	2	1	2	1	2	1	2	2	2	2	1	2	1	1	1	1	2	1	2	1	1	2	1	1	1	2
2021-04-26	2	2	1	1	1	1	2	1	1	1	2	2	2	2	1	2	2	2	1	1	2	2	2	1	1	2	1	2	2	2	1	2	2	1	2	1	2	1	2	2	2	2	2	2	1	2	2	2	2
2021-04-26	1	1	2	1	1	1	1	1	1	1	2	2	1	1	1	2	1	1	2	2	1	1	1	2	1	1	1	2	2	2	2	2	2	2	2	1	2	1	2	2	2	2	2	1	1	2	1	2	1
2021-04-26	2	1	2	1	1	1	1	1	1	1	2	2	2	2	1	2	2	2	2	1	1	2	2	1	1	2	2	2	2	2	2	2	2	1	2	2	2	2	1	2	2	2	2	2	1	2	2	2	2
2021-04-26	2	2	2	1	1	1	2	1	1	2	2	2	2	1	1	2	2	2	2	2	2	2	2	2	1	2	1	2	2	2	1	2	2	2	2	2	2	2	1	2	2	2	2	2	1	2	2	2	2
2021-04-26	2	1	1	1	1	1	2	2	2	2	2	2	2	2	2	2	2	1	2	1	1	1	2	2	1	1	1	2	2	1	1	2	2	2	2	1	2	2	1	1	1	2	2	1	1	1	2	1	1
2021-04-26	2	1	2	1	1	1	2	1	1	1	2	2	2	2	1	2	2	2	2	2	2	2	2	1	1	2	1	2	2	2	1	2	2	2	2	2	2	2	1	2	2	2	2	2	1	2	2	2	2
2021-04-26	1	2	1	1	1	2	2	1	1	2	1	1	2	2	1	2	2	2	1	1	2	2	2	2	1	1	1	2	1	2	1	1	2	1	2	1	2	1	1	2	1	1	1	1	2	1	1	1	1
2021-04-26	2	1	2	1	2	2	2	2	1	2	1	2	2	2	2	2	2	2	2	2	1	1	2	2	1	1	1	2	1	1	1	2	2	2	2	2	2	2	1	2	1	1	2	1	2	1	2	2	2
2021-04-26	1	2	2	1	1	2	2	1	1	1	2	2	2	2	1	2	2	1	2	1	2	2	2	2	2	2	1	2	2	2	1	2	2	2	2	2	1	2	1	2	2	2	2	1	1	2	2	2	2
2021-04-26	2	2	2	1	2	1	2	1	2	1	2	2	2	2	2	2	2	1	2	2	2	2	2	2	2	2	1	2	2	2	1	2	2	1	2	2	2	1	2	2	1	2	2	2	1	2	2	2	2
[truncated: 112 more columns]

## Sheet: testMayerSalovey
Results of users who have taken the Mayyer Salovey test
Date	A_1_1	A_1_2	A_1_3	A_1_4	A_1_5	A_2_1	A_2_2	A_2_3	A_2_4	A_2_5	A_3_1	A_3_2	A_3_3	A_3_4	A_3_5	A_4_1	A_4_2	A_4_3	A_4_4	A_4_5	B_1_1	B_1_2	B_1_3	B_2_1	B_2_2	B_2_3	B_3_1	B_3_2	B_3_3	B_4_1	B_4_2	B_4_3	B_5_1	B_5_2	B_5_3	C_1	C_2	C_3	C_4	C_5	C_6	C_7	C_8	C_9	C_10	C_11	C_12	C_13	C_14
2022-02-03	2	1	1	1	2	1	4	2	1	1	1	4	3	1	1	3	1	1	1	1	1	1	5	1	5	1	5	1	1	1	2	5	1	4	2	2	4	5	1	3	2	1	2	3	1	1	2	2	4
2022-05-04	1	1	1	5	1	1	3	3	1	1	1	5	1	1	1	4	1	1	1	1	1	1	5	1	5	1	5	1	1	1	1	1	1	5	1	2	4	5	5	1	2	3	2	3	3	1	2	2	2
2022-05-04	1	2	1	3	1	1	3	1	1	1	1	4	3	1	1	3	2	1	1	2	1	1	5	3	5	1	3	1	5	3	4	2	2	5	4	1	4	5	3	3	4	3	2	1	3	3	5	2	4
2022-05-04	1	2	1	5	1	1	4	2	1	1	1	5	4	1	1	4	1	1	1	1	1	1	5	1	5	1	2	1	5	1	5	1	4	3	1	2	4	5	3	3	4	2	2	3	1	1	5	2	4
2022-05-04	2	3	4	1	2	1	4	5	1	1	1	4	3	1	1	5	1	1	1	1	1	1	5	1	4	3	5	1	3	1	5	1	1	1	5	2	4	3	5	1	4	3	2	3	1	3	1	5	4
2022-05-04	2	1	1	1	1	1	3	1	1	1	1	2	2	1	1	5	1	1	1	1	1	1	5	2	3	1	1	1	5	3	3	3	2	5	1	2	4	5	5	3	4	3	2	3	1	1	2	5	4
2022-05-05	2	1	1	1	1	1	2	2	1	1	1	2	1	1	1	3	4	4	2	1	1	1	5	1	5	1	2	1	1	1	1	1	1	1	1	2	4	4	5	1	2	4	2	3	1	1	3	5	2
2022-05-05	2	2	1	5	1	1	5	1	1	1	1	5	4	1	1	4	1	1	1	1	2	3	4	3	1	2	1	3	2	2	3	1	2	3	1	2	4	2	5	1	2	3	3	2	1	1	5	2	2
2022-05-05	2	2	1	3	1	1	2	2	1	1	1	3	2	1	1	5	2	2	1	1	1	1	5	3	4	3	1	1	5	3	3	1	4	5	1	4	4	5	2	1	2	3	2	3	1	1	5	2	2
2022-05-05	1	2	1	5	1	1	3	2	1	1	1	4	3	1	1	4	1	1	2	1	1	1	5	1	5	1	3	1	4	1	4	2	1	4	2	2	4	5	5	3	2	3	3	3	1	1	1	2	4
2022-05-06	1	1	1	1	1	1	1	2	1	1	1	4	1	1	1	4	1	1	1	1	1	1	5	1	5	1	2	1	4	2	3	1	1	4	2	2	4	5	5	3	4	3	2	3	1	1	1	2	4
2022-05-06	3	2	3	2	3	2	3	1	2	2	2	4	2	1	1	4	1	1	1	1	1	1	5	1	3	1	3	1	2	1	2	2	1	1	5	3	4	2	5	3	4	3	2	3	1	1	1	2	4
2022-05-08	1	4	1	1	1	1	5	1	1	1	1	5	4	1	1	4	1	1	1	1	1	1	5	1	5	1	1	1	5	1	5	1	1	1	5	3	3	5	4	3	2	2	2	3	3	1	2	1	4
2022-05-09	2	1	1	1	2	1	2	1	1	1	1	3	2	1	1	4	1	1	1	1	1	1	5	1	5	1	1	1	5	1	5	1	2	5	2	4	4	4	5	3	2	2	3	3	3	1	5	2	4
2022-05-09	1	1	1	2	1	1	3	2	1	1	1	4	1	1	1	4	1	1	1	1	1	1	5	1	5	1	3	1	4	1	3	1	1	3	2	3	4	5	5	3	4	2	3	3	3	1	1	2	4
2022-05-09	3	1	1	3	1	1	3	2	1	1	1	4	2	1	1	5	1	1	1	1	1	1	5	1	5	1	4	1	3	1	3	3	3	4	1	2	4	2	5	3	4	1	2	2	3	3	1	2	2
2022-05-10	1	1	1	1	1	1	3	1	1	1	1	4	2	1	1	4	1	1	1	1	1	1	5	1	5	1	3	1	2	1	4	2	1	2	5	2	4	1	5	3	2	3	3	3	1	1	5	2	2
2022-05-10	1	1	1	3	1	1	4	4	1	1	1	3	2	1	1	5	1	1	1	1	1	1	5	1	5	1	4	1	3	1	4	3	5	5	4	2	3	4	2	1	2	3	2	3	1	3	5	2	3
2022-05-10	1	1	1	3	1	1	4	4	1	1	1	3	2	1	1	5	1	1	1	1	1	1	5	1	5	1	4	1	3	1	4	3	5	5	4	2	3	4	2	1	2	3	2	3	1	3	5	2	3
2022-05-15	2	2	1	2	1	1	3	2	1	1	1	4	3	2	1	5	1	1	1	1	1	1	4	1	4	1	2	1	4	2	3	2	1	4	2	2	4	4	5	3	2	3	2	3	3	1	2	2	4
2022-05-15	1	1	1	1	1	1	1	1	1	1	1	2	1	1	1	2	1	1	1	1	1	1	2	2	1	1	2	1	3	1	1	1	1	3	1	1	1	1	1	1	4	1	1	1	1	1	1	2	2
2022-05-17	1	3	2	2	1	1	3	3	1	1	1	3	2	1	1	3	2	2	2	1	1	1	5	1	5	1	3	1	4	1	1	3	2	3	1	2	4	2	1	1	4	2	2	3	5	1	1	2	2
2022-05-17	2	1	1	4	1	1	3	3	1	1	1	4	3	1	1	5	1	1	1	1	1	2	5	1	2	4	3	1	1	1	4	2	1	2	4	2	4	5	4	1	3	2	2	3	5	3	2	2	3
2022-05-19	1	2	1	2	1	1	5	2	1	1	1	5	5	1	1	4	2	1	1	1	1	1	5	1	5	3	4	1	3	1	5	3	2	1	5	5	4	2	5	4	3	3	2	3	1	1	2	2	4
2022-05-19	2	1	1	1	1	1	2	1	1	1	1	1	1	1	1	3	1	1	1	1	1	1	5	1	1	2	2	1	1	1	1	2	1	1	1	2	4	2	3	3	1	1	2	3	3	1	3	2	2
2022-05-20	1	1	1	2	1	1	3	1	1	1	1	3	2	1	1	4	1	1	1	1	1	1	4	1	4	1	2	1	3	1	3	2	1	3	2	2	4	5	3	3	4	3	2	2	1	1	1	2	4
2022-05-22	1	3	1	4	1	1	3	2	1	1	1	4	2	1	1	4	1	1	2	1	1	1	5	1	5	1	3	1	4	1	4	2	1	4	3	3	4	5	4	3	4	3	3	3	1	1	5	4	4
2022-05-23	2	1	1	1	1	1	4	1	1	1	1	4	2	1	1	4	1	1	1	1	1	1	4	1	5	1	1	1	4	4	2	1	3	5	1	2	4	4	3	3	2	2	3	3	3	1	2	2	4
2022-05-23	1	3	1	3	1	1	3	2	1	1	1	5	2	1	1	3	1	1	1	1	1	1	5	1	2	1	1	1	2	1	1	1	1	1	5	1	1	1	1	1	2	1	3	1	1	1	1	1	2
2022-05-27	2	1	1	2	1	1	2	1	1	1	1	3	1	1	1	4	1	1	1	1	1	1	4	1	4	1	2	1	3	1	3	1	1	3	2	2	4	1	1	3	4	2	3	3	1	1	1	2	3
2022-05-28	1	2	1	4	1	1	3	3	1	1	1	5	4	1	1	5	1	1	1	1	1	1	5	1	5	1	2	1	5	1	3	1	1	5	1	2	4	4	1	3	4	2	3	3	1	1	5	2	4
2022-05-29	3	1	1	2	1	1	3	2	1	1	1	4	3	1	1	4	1	1	1	1	1	2	4	1	4	2	3	1	2	2	3	1	1	3	4	4	4	5	5	3	4	3	2	3	5	3	1	2	3
2022-05-29	1	3	2	3	1	1	3	1	1	1	1	3	2	1	1	4	1	1	1	1	1	1	4	1	4	1	2	1	2	2	3	2	1	4	1	2	4	4	1	3	2	2	3	3	1	1	2	2	4
2022-05-30	1	1	1	1	1	1	1	1	1	1	1	4	2	1	1	4	1	1	1	1	1	1	5	1	4	1	4	1	2	1	4	1	1	5	1	2	4	5	1	3	2	3	3	3	3	1	1	2	4
2022-05-30	2	2	1	2	1	1	3	2	1	1	1	4	2	1	1	2	2	2	2	1	1	1	5	1	5	1	3	1	2	1	3	4	3	4	2	3	1	5	1	1	2	2	2	3	3	1	2	2	2
2022-05-31	1	1	1	3	1	1	1	1	1	1	1	1	4	1	1	3	1	1	1	1	1	1	5	1	3	1	4	1	1	1	3	1	1	5	1	2	4	1	5	1	2	2	3	1	3	1	1	2	4
[truncated: 92 more columns]

## Sheet: Emotion_sentences
User interactions in the "talk about emotions" phase, along with the emotion labels assigned by CuentosIE to those emotions
Date on which the interaction takes place
	Textual user interaction
		Emotion that CuentosIE assigns to that interaction. If nothing appears, CuentosIE has not been able to determine what emotion that interaction is about.
Date	User sentence	Emotional category
2021-04-12	.
2021-04-12	.
2021-04-12	Esta bien	_dinero__construir_el_puente_
2021-04-12	Hoy , estoy bien . El otro día me sentí humillado por mis supuestos amigos que me apartaban todo el rato diciéndome vete o otras palabras y luego me sentía muy mal 😞.	_arrogancia__tristeza__malestar__frustracion__humillacion_
2021-04-12	La moraleja es : Si las cosas te salen mal o no te salen como te gustaría no cambias sigues siendo el mismo.	_nestor_el_castor__carlota_y_su_mochila__un_payaso_muy_inquieto__cuando_el_viento_sopla__los_dientes_del_sultan_
2021-04-12	Pregunta	_duda__deseo__arrogancia_
2021-04-12	Si , por algunas cosas es buena pero por otras está mal .	_frustracion__alegria__amor__entusiasmo__placer_
2021-04-12	Si
2021-04-12	Si
2021-04-12	Si
2021-04-12	Si
2021-04-12	Si, se conforma con lo que hace	_entusiasmo__malestar__compasion__fobia__certeza_
2021-04-12	Un especialista	_un_vaso_de_leche_
2021-04-12	¿Hola?
2021-04-12	Adicciones y trabajo.	_dinero__un_payaso_muy_inquieto__el_acoso_a_marita_cuento_para_hablar_sobre_el_bullying_con_los_ninyos__el_arbol_confundido__carlota_y_su_mochila_
2021-04-12	Duda	_el_arbol_confundido__bordados_de_la_vida__destino_o_libre_albedrio__entrevista_a_dios__arreglar_al_mundo_
2021-04-12	El dinero(en billete) es un papel, pero con un simple número y unos dibujos. El papel sería como la ventana y el billete como el espejo.	_el_valor_de_un_billete_de_100__necesito_un_abrazo__dinero_
2021-04-12	Lobo	_fobia__malestar_
2021-04-12	Lobos	_fobia__malestar_
2021-04-12	Me gustaría ser un super humano	_miedo__agrado__placer__entusiasmo__alegria_
2021-04-12	No tengo fobias
2021-04-12	No
2021-04-12	No
2021-04-12	No
2021-04-12	Quiero ser ingeniero aeroespacial
2021-04-12	Sí
2021-04-12	Sí
2021-04-12	Sí
2021-04-12	Sí
2021-04-12	Estoy cansada pero también alegre	_agotamiento__aburrimiento__alegria__diversion__tristeza_
2021-04-12	Hoy estoy bien
2021-04-12	No añadiría ni cambiaría nada, esta correcta de esa forma
2021-04-12	Pienso que trata sobre apatía aburrimiento y frustración también	_pedro_y_el_hilo_magico__arreglar_al_mundo__paz_en_medio_de_las_dificultades__asamblea_en_la_carpinteria__el_capitan_y_el_grumete_
2021-04-12	Si
2021-04-12	Si
2021-04-12	Si, estoy de acuerdo	_destino_o_libre_albedrio__asamblea_en_la_carpinteria_
2021-04-12	Sigo hablando	_humillacion__fortaleza__ira__certeza__tristeza_
2021-04-12	Trata sobre la vida, de como el chico pasa de niño a adolescente y envejece y muere su esposa, por eso está correcto y trata sobre adolescencia, envejecimiento y muerte.	_pedro_y_el_hilo_magico__el_acoso_a_marita_cuento_para_hablar_sobre_el_bullying_con_los_ninyos__necesito_un_abrazo__la_ofensa__el_arbol_de_manzanas_
2021-04-12	Estoy alegre porque en el cole estoy con mis amigas pero estoy un poco cansada porque no quiero estudiar para los exámenes.	_alegria__tristeza__agotamiento__aburrimiento__calma_
2021-04-12	Hola, hoy estoy bien
2021-04-12	La moraleja sería que el amor es muy valioso porque con una simple sonrisa podemos alegrar a muchas personas y también que todo el mundo merece amor, da igual si eres rico o pobre todo el mundo merece ser feliz y tener amor en su vida.	_una_sonrisa__carlota_y_su_mochila__el_tren_de_la_vida__un_payaso_muy_inquieto__nestor_el_castor_
2021-04-12	Que una sonrisa vale mucho y también que todos merecemos amor en nuestra vida sin importar quien seamos.	_una_sonrisa__almuerzo_con_dios__carlota_y_su_mochila__el_tren_de_la_vida__un_payaso_muy_inquieto_
2021-04-12	Si
2021-04-12	Si
2021-04-12	Si, algunas poesías.
2021-04-12	Yo creo que el cuento trata sobre: alegría, amor y agrado.	_nestor_el_castor__una_sonrisa__el_amor_y_el_tiempo__el_tren_de_la_vida__los_lobos_
2021-04-12	Yo creo que trata más sobre el amor y la felicidad pero sí que trata un poco sobre el trabajo.	_un_payaso_muy_inquieto__una_sonrisa__entrevista_a_dios__el_tren_de_la_vida__las_mejores_semillas_
2021-04-12	Hay mil formas de hacer cualquier cosa.	_reflejo_de_tus_actos__arreglar_al_mundo__los_dientes_del_sultan__los_ingredientes_del_bizcocho__triple_filtro_
2021-04-12	Si
2021-04-12	Si
2021-04-12	8	_valentia__tristeza__diversion_
2021-04-12	Estoy preocupada por una amiga.	_alegria__calma__tristeza_
2021-04-12	Habla de la seguridad en uno mismo.	_las_dos_vasijas_de_agua__triple_filtro__la_oruga__carlota_y_su_mochila__un_payaso_muy_inquieto_
2021-04-12	La seguridad en uno mismo	_las_dos_vasijas_de_agua__la_oruga__cuando_el_viento_sopla__triple_filtro__carlota_y_su_mochila_
2021-04-12	No se a que te referías	_certeza__apatia__calma__deseo__aburrimiento_
2021-04-12	No tienes que ser como los demás ni como ellos quieran. Solo sé tú mismo.	_carlota_y_su_mochila__pedro_y_el_hilo_magico__el_capitan_y_el_grumete__la_oruga__un_payaso_muy_inquieto_
2021-04-12	Sí
2021-04-12	Sí
2021-04-12	Sí
2021-04-12	Sí
2021-04-12	Sí
2021-04-12	Sí, trata sobre la duda en uno mismo. Duda, frustración, malestar y tristeza	_entrevista_a_dios__el_arbol_confundido__asamblea_en_la_carpinteria__bordados_de_la_vida__el_capitan_y_el_grumete_
2021-04-12	A mi abuelo	_los_ingredientes_del_bizcocho__la_fabula_del_lapiz__los_lobos__el_tren_de_la_vida__almuerzo_con_dios_
2021-04-12	A mi abuelo	_los_ingredientes_del_bizcocho__la_fabula_del_lapiz__los_lobos__el_tren_de_la_vida__almuerzo_con_dios_
2021-04-12	Con el pesimismo y el optimismo
2021-04-12	Esta bien el cuento	_dinero__construir_el_puente_
2021-04-12	Lo he dicho 4 veces	_carlota_y_su_mochila__el_valor_de_un_billete_de_100__el_arbol_de_los_problemas__las_dos_vasijas_de_agua__el_aborto_un_cuento_de_horror_
2021-04-12	Lo he dicho antes 3 veces	_carlota_y_su_mochila__el_valor_de_un_billete_de_100__un_payaso_muy_inquieto__el_arbol_de_los_problemas__calidad_emocional_
2021-04-12	Nada
2021-04-12	Nada
2021-04-12	ninguno
2021-04-12	Ninguno
2021-04-12	ninguno
2021-04-12	Ninguno
2021-04-12	no
2021-04-12	No cambiaría nada, esta correctamente expresado
2021-04-12	no lo se
2021-04-12	No lo sé, es corto	_los_dientes_del_sultan__el_arbol_de_manzanas__bordados_de_la_vida__necesito_un_abrazo__el_aborto_un_cuento_de_horror_
2021-04-12	no se
2021-04-12	no se
2021-04-12	No
2021-04-12	no
2021-04-12	No
2021-04-12	no
2021-04-12	no
2021-04-12	No
2021-04-12	No
2021-04-12	no
2021-04-12	No
2021-04-12	No
2021-04-12	No
2021-04-12	no
2021-04-12	no
2021-04-12	no, ninguna
2021-04-12	Ok
2021-04-12	Ok
2021-04-12	para aprender	_entrevista_a_dios__una_taza_de_te__amar_lo_que_somos__los_ingredientes_del_bizcocho__carlota_y_su_mochila_
2021-04-12	Pesimismo y optimismo
2021-04-12	porque es pesimista	_los_dientes_del_sultan_
2021-04-12	porque no
2021-04-12	si
2021-04-12	si
2021-04-12	si
2021-04-12	si
2021-04-12	Si
2021-04-12	Si
2021-04-12	Si
2021-04-12	Si
2021-04-12	Si
2021-04-12	Si
2021-04-12	si
2021-04-12	Si
2021-04-12	Si
2021-04-12	si
2021-04-12	si
2021-04-12	si
2021-04-12	si
2021-04-12	Si
2021-04-12	si
2021-04-12	si
2021-04-12	Si
2021-04-12	Si
2021-04-12	si
2021-04-12	si
2021-04-12	si
2021-04-12	Si
2021-04-12	Si
2021-04-12	si
2021-04-12	Un adulto	_pedro_y_el_hilo_magico_
2021-04-12	Ya
2021-04-12	9	_valentia__alegria__miedo_
2021-04-12	Creo que no trata de amor, pero por el resto si.	_el_tren_de_la_vida__el_capitan_y_el_grumete__bordados_de_la_vida__un_payaso_muy_inquieto__una_sonrisa_
2021-04-12	Estoy contento	_alegria__agrado__entusiasmo__satisfaccion_
2021-04-12	Estoy feliz por que vivo bien	_alegria_
2021-04-12	Estoy tranquilo, y alegre, y estoy satisfecho con la vida que tengo, pero en el fondo soy algo tímido.	_alegria__agrado__entusiasmo__compasion__tension_
2021-04-12	Haciendo como el protagonista, trabajar y luego tener la tranquilidad del trabajo hecho.	_deja_la_cuchara__destino_o_libre_albedrio__reflejo_de_tus_actos__los_dientes_del_sultan__el_arbol_confundido_
2021-04-12	La enseñanza que se extrae de este cuento es que sin esfuerzo, no hay recompensa.	_el_capitan_y_el_grumete__nestor_el_castor__estrellas_de_mar_en_la_playa__las_dos_ranas__la_oruga_
2021-04-12	Me gusta ser feliz	_alegria_
2021-04-12	Me ha gustado	_nestor_el_castor__las_siete_tinajas_de_oro__la_fabula_del_lapiz__paz_en_medio_de_las_dificultades__semillas_
2021-04-12	No
2021-04-12	No
2021-04-12	Puede ser que este cuento contenga algo de la emoción ‘estrés’ y quizás ligeramente algo de acoso, pero muy leve.	_el_acoso_a_marita_cuento_para_hablar_sobre_el_bullying_con_los_ninyos__triple_filtro__la_ofensa__suenyo__paz_en_medio_de_las_dificultades_
2021-04-12	Puede ser	_apatia__deseo__fobia__fortaleza__arrogancia_
2021-04-12	Pues que la felicidad es necesaria para hacer otras cosas bien	_tristeza__placer__agrado__satisfaccion__amor_
2021-04-12	Que las personas más cercanas a mi que trabajan, luego obtienen recompensa.	_el_capitan_y_el_grumete__el_arbol_de_manzanas__las_dos_vasijas_de_agua__triple_filtro__dr_alexander_fleming_
2021-04-12	si ha tenido éxito	_la_fabula_del_helecho_y_el_bambu__sacudete__asamblea_en_la_carpinteria__el_valor_de_un_billete_de_100__reflejo_de_tus_actos_
2021-04-12	Si he llegado	_las_siete_tinajas_de_oro__cuando_el_viento_sopla__te_compro_1_hora__sacudete__dr_alexander_fleming_
2021-04-12	Si
2021-04-12	Si
2021-04-12	Si
2021-04-12	Si
2021-04-12	Si, la verdad es que el autor expresa muy bien esta moraleja.	_nestor_el_castor__los_dientes_del_sultan__los_lobos__triple_filtro__la_fabula_del_lapiz_
2021-04-12	Si, no está mal.
2021-04-12	Si, sin duda.	_el_arbol_confundido__bordados_de_la_vida__destino_o_libre_albedrio__entrevista_a_dios__arreglar_al_mundo_
2021-04-12	Soy feliz y estoy satisfecho con mi vida	_alegria__tension__deseo__agrado__placer_
2021-04-12	Soy feliz	_alegria_
2021-04-12	Y me satisface ver los resultados del trabajo	_frustracion__ira__tension__alegria__duda_
2021-04-12	Yo soy feliz	_alegria_
2021-04-12	.
2021-04-12	Dolor, miedo, tristeza, puede que depresión porque perder un/a hijo/a involuntariamente es horrible.	_el_aborto_un_cuento_de_horror__dr_alexander_fleming__un_payaso_muy_inquieto__almuerzo_con_dios__pedro_y_el_hilo_magico_
2021-04-12	Estoy de acuerdo pero añadiría cosas a la moraleja, se queda corta.	_nestor_el_castor__almuerzo_con_dios__asamblea_en_la_carpinteria__destino_o_libre_albedrio__el_arbol_de_manzanas_
2021-04-12	Hola
2021-04-12	Pues hoy me he levantado mejor que muchos días y de momento nada está siendo tan duro. Si fuera así siempre estaría mucho mejor.	_tristeza__frustracion__satisfaccion__agrado__arrogancia_
2021-04-12	Si
2021-04-12	Sí, la mujer claramente tiene miedo y tristeza ya que un aborto obligado no es nada bonito ni justo.	_el_aborto_un_cuento_de_horror__un_payaso_muy_inquieto__necesito_un_abrazo__el_capitan_y_el_grumete__pedro_y_el_hilo_magico_
2021-04-12	Sí.
2021-04-12	afornta una temática de fortaleza y de trabajo además también de envejecimiento	_entrevista_a_dios__la_oruga__el_ingenio_de_una_hormiga__sacudete__los_ingredientes_del_bizcocho_
2021-04-12	Fortaleza	_sacudete__el_ingenio_de_una_hormiga__cuando_el_viento_sopla__los_ingredientes_del_bizcocho__la_oruga_
2021-04-12	Me siento engañado por que las personas me hacen sentir de una manera de la que se arrepienten	_frustracion__agrado__compasion__tension__miedo_
2021-04-12	No estas equivocado	_ira__frustracion_
2021-04-12	No lo creo mas que enfadado me siento engañado	_frustracion__malestar__ira__arrogancia__odio_
2021-04-12	no me lo parece lo que me parece es que depende de las acciones que hagan los demás o tú mismo te sentirás más o menos enfadado	_malestar__ira__duda__amor__satisfaccion_
2021-04-12	No me siento feliz si no triste 4	_alegria__frustracion__tristeza__agotamiento__valentia_
2021-04-12	no tengo ninguna objeción
2021-04-12	No
2021-04-12	No
2021-04-12	No
2021-04-12	No
2021-04-12	no
2021-04-12	Que no todo el mundo no le da importancia al poder de un abrazo	_carlota_y_su_mochila__almuerzo_con_dios__necesito_un_abrazo__te_compro_1_hora__la_ultima_casa_del_carpintero_
2021-04-12	Seguramente por que siempre tienes que ayudar a alguien	_el_valor_de_un_billete_de_100__el_aborto_un_cuento_de_horror__el_ingenio_de_una_hormiga__el_tren_de_la_vida__el_arbol_de_los_problemas_
2021-04-12	Si
2021-04-12	Si
2021-04-12	Si
2021-04-12	Si
2021-04-12	Si
2021-04-12	si
2021-04-12	Siento que juegan con migo	_frustracion__ira__diversion__malestar_
2021-04-12	Trabajo	_un_payaso_muy_inquieto__el_acoso_a_marita_cuento_para_hablar_sobre_el_bullying_con_los_ninyos__el_arbol_confundido__carlota_y_su_mochila__la_fabula_del_helecho_y_el_bambu_
2021-04-12	Ansiedad	_deja_la_cuchara__paz_en_medio_de_las_dificultades__el_capitan_y_el_grumete__entrevista_a_dios_
2021-04-12	No estas en lo cierto	_certeza_
2021-04-12	No me encuentro muy feliz, me han entristecido y estoy agobiado por los exámenes, quiero a alguien	_alegria__frustracion_
2021-04-12	Si
2021-04-12	Si
2021-04-12	Si
2021-04-12	Si
2021-04-12	Valentía	_las_siete_tinajas_de_oro__las_dos_vasijas_de_agua__triple_filtro__destino_o_libre_albedrio__el_acoso_a_marita_cuento_para_hablar_sobre_el_bullying_con_los_ninyos_
2021-04-12	Yo la expresaría de esta forma: da igual como seas si eres diferente por fuera o por dentro siempre habra un lado feliz de ti	_un_payaso_muy_inquieto__la_ultima_casa_del_carpintero__el_acoso_a_marita_cuento_para_hablar_sobre_el_bullying_con_los_ninyos__calidad_emocional__el_capitan_y_el_grumete_
2021-04-12	Hoy en un juego me han atacado y me han quitado mucho dinero	_ira__fortaleza__frustracion_
2021-04-12	Hoy me he despertado muy triste por que el otro día el Barça perdió con el madrid	_tristeza__frustracion__ira__diversion__arrogancia_
2021-04-12	Hoy me he puesto triste	_frustracion__tristeza_
2021-04-12	Hubiese hecho lo mismo	_el_arbol_confundido__dr_alexander_fleming__los_dientes_del_sultan__reflejo_de_tus_actos__la_oruga_
2021-04-12	Lo peor es que la última conversación con mi padre sea que le grite y él se muera	_ira__arrogancia__diversion__amor__frustracion_
2021-04-12	Muy bien
2021-04-12	No te equivocaste	_ira__frustracion_
2021-04-12	No
2021-04-12	Pero lo bueno es que he vuelto al colegio y voy a jugar con mis amigos al futbol	_alegria__frustracion__tristeza__diversion__ira_
2021-04-12	Propón cuento	_tristeza_
2021-04-12	Propone un cuento	_tristeza_
2021-04-12	Si mi hermana por que siempre está estresada con los examenes	_construir_el_puente__carlota_y_su_mochila__el_tren_de_la_vida__el_aborto_un_cuento_de_horror__deja_la_cuchara_
2021-04-12	Si por que el hombre está estresado ya que no consigue concentrarse	_entrevista_a_dios__la_ofensa__deja_la_cuchara__paz_en_medio_de_las_dificultades__el_aborto_un_cuento_de_horror_
2021-04-12	Si por que mi padre siempre me da consejos	_el_tren_de_la_vida__dr_alexander_fleming__arreglar_al_mundo__te_compro_1_hora__el_acoso_a_marita_cuento_para_hablar_sobre_el_bullying_con_los_ninyos_
2021-04-12	Si por que un día estuve estresado por que me había pasado algo muy importante y mi padre me dio un consejo para ayudarme	_arreglar_al_mundo__carlota_y_su_mochila__un_payaso_muy_inquieto__te_compro_1_hora__el_tren_de_la_vida_
2021-04-12	Si
2021-04-12	Si
2021-04-12	Si
2021-04-12	Si
2021-04-12	Sigo hablando	_humillacion__fortaleza__ira__certeza__tristeza_
2021-04-12	Un poco mi padre se ha vuelto muy pesado de lo normal y encima se ha sumado mi madre	_tristeza__miedo__amor__alegria__frustracion_
2021-04-12	Y encima se me ha apagado el movil	_tristeza_
2021-04-12	Yo creo que también serviría el sentimiento de duda	_bordados_de_la_vida__un_payaso_muy_inquieto__una_sonrisa__arreglar_al_mundo__el_amor_y_el_tiempo_
2021-04-12	Yo pondría como ejemplo lo de la cuchara no otro que no tiene sentido con el cuento	_deja_la_cuchara__el_valor_de_un_billete_de_100__la_ultima_casa_del_carpintero__calidad_emocional__la_ofensa_
2021-04-12
2021-04-12
2021-04-12	Como un
2021-04-12	Si de educación	_los_lobos__te_compro_1_hora__semillas__la_ofensa__el_arbol_de_manzanas_
2021-04-12	Si
2021-04-12	Si
2021-04-12	Si
2021-04-12	Si
2021-04-12	Si
2021-04-12	A veces	_dr_alexander_fleming__carlota_y_su_mochila__el_acoso_a_marita_cuento_para_hablar_sobre_el_bullying_con_los_ninyos__el_capitan_y_el_grumete__el_arbol_de_los_problemas_
2021-04-12	De lo que realmente era La Paz, porque yo pensaba que era estar en silencio y sin molestias	_el_aborto_un_cuento_de_horror__necesito_un_abrazo__almuerzo_con_dios__el_tren_de_la_vida__el_arbol_de_los_problemas_
2021-04-12	No lo sé	_pedro_y_el_hilo_magico__el_capitan_y_el_grumete__la_oruga__el_arbol_de_los_problemas__necesito_un_abrazo_
2021-04-12	No pienso que esté relacionado con ninguno
2021-04-12	No
2021-04-12	No
2021-04-12	Para mi lo ha descrito bastante bien y me ha impresionado	_leyenda_china_
2021-04-12	Si
2021-04-12	Si
2021-04-12	Si
2021-04-12	Tengo bastantes problemas familiares	_ira__amor__duda__tristeza__arrogancia_
2021-04-12	Un poco
2021-04-12	Yo pienso que solo trata sobre la calma	_paz_en_medio_de_las_dificultades__deja_la_cuchara__el_tren_de_la_vida__asamblea_en_la_carpinteria__el_arbol_de_manzanas_
2021-04-12	El que me cae mejor es el niño y el que peor es el padre	_carlota_y_su_mochila__arreglar_al_mundo__el_arbol_de_manzanas__semillas__dr_alexander_fleming_
2021-04-12	Nervioso	_tension__dolor_
2021-04-12	No hace falta dinero para estar con alguien
2021-04-12	No lo sé	_pedro_y_el_hilo_magico__el_capitan_y_el_grumete__la_oruga__el_arbol_de_los_problemas__necesito_un_abrazo_
2021-04-12	No
2021-04-12	No
2021-04-12	No
2021-04-12	No
2021-04-12	No
2021-04-12	No
2021-04-12	No
2021-04-12	Pues mejoraría no pidiendo mucho dinero a los mayores	_amar_lo_que_somos__destino_o_libre_albedrio_
2021-04-12	Que el dinero no es todo	_dinero__el_arbol_de_manzanas__el_valor_de_un_billete_de_100__entrevista_a_dios__te_compro_1_hora_
2021-04-12	Que el dinero no esto todo para la vida humana	_la_fabula_del_helecho_y_el_bambu__un_vaso_de_leche__un_payaso_muy_inquieto__el_valor_de_un_billete_de_100__asamblea_en_la_carpinteria_
2021-04-12	Si
2021-04-12	Si
2021-04-12	Si
2021-04-12	Si
2021-04-12	Si
2021-04-12	si
2021-04-12	Solo trata de seseo y amor	_el_tren_de_la_vida__dr_alexander_fleming__el_amor_y_el_tiempo__entrevista_a_dios__un_payaso_muy_inquieto_
2021-04-12	Todas
2021-04-12	Duda	_el_arbol_confundido__bordados_de_la_vida__destino_o_libre_albedrio__entrevista_a_dios__arreglar_al_mundo_
2021-04-12	No cambiaría nada.
2021-04-12	No
2021-04-12	Pues tengo algunos problemas y aveces me estreso un poco.	_ira__duda__agrado__deseo__amor_
2021-04-12	Si
2021-04-12	Si
2021-04-12	Si
2021-04-12	Si, hoy estoy más o menos bien
2021-04-12	Un poco de depresión	_almuerzo_con_dios__un_payaso_muy_inquieto_
2021-04-12	Alguna vez he meditado con mis amigos para calmar el estrés	_deja_la_cuchara__paz_en_medio_de_las_dificultades__la_ofensa__entrevista_a_dios__el_capitan_y_el_grumete_
2021-04-12	Calma	_deja_la_cuchara__paz_en_medio_de_las_dificultades_
2021-04-12	Estoy de acuerdo con la moraleja	_nestor_el_castor_
2021-04-12	lo mismo	_carlota_y_su_mochila__el_acoso_a_marita_cuento_para_hablar_sobre_el_bullying_con_los_ninyos__pedro_y_el_hilo_magico__el_capitan_y_el_grumete__un_payaso_muy_inquieto_
2021-04-12	No
2021-04-12	No
2021-04-12	No
2021-04-12	No
2021-04-12	No
2021-04-12	Nose
2021-04-12	Nose
2021-04-12	Para ayudar a otros	_las_mejores_semillas__el_amor_y_el_tiempo__el_alacran__un_payaso_muy_inquieto__sacudete_
2021-04-12	Que meditar es bueno para calmar muchas emociones y sentimientos	_deja_la_cuchara__paz_en_medio_de_las_dificultades__la_ofensa__un_payaso_muy_inquieto__el_amor_y_el_tiempo_
2021-04-12	Que todos estaríamos más relajados	_bordados_de_la_vida_
2021-04-12	Si
2021-04-12	Si
2021-04-12	Si
2021-04-12	Si
2021-04-12	Si
2021-04-12	Tengo hambre	_placer__agrado__ira__amor__humillacion_
2021-04-12	Todos me caen bien	_dr_alexander_fleming__un_payaso_muy_inquieto__paz_en_medio_de_las_dificultades__el_alacran__construir_el_puente_
2021-04-12	Un especialista o maestro	_un_vaso_de_leche__deja_la_cuchara__dinero__una_taza_de_te__semillas_
2021-04-12	A favor esta la moraleja que tiene	_nestor_el_castor__la_ultima_casa_del_carpintero__carlota_y_su_mochila__el_valor_de_un_billete_de_100__reflejo_de_tus_actos_
2021-04-12	Depresión	_almuerzo_con_dios__un_payaso_muy_inquieto_
2021-04-12	Si
2021-04-12	Si
2021-04-12	Si
2021-04-12	Si
2021-04-12	Tristeza	_el_amor_y_el_tiempo__una_sonrisa__el_tren_de_la_vida__la_fabula_del_helecho_y_el_bambu__un_payaso_muy_inquieto_
2021-04-12	Estoy cansada	_agotamiento__aburrimiento_
2021-04-12	Si
2021-04-12	Si
2021-04-12	Si, el cuadro representaba la calma y el segundo la tensión y la ira.	_paz_en_medio_de_las_dificultades__deja_la_cuchara__necesito_un_abrazo__la_ofensa__los_dientes_del_sultan_
2021-04-12	Trata solo de esos temas.	_el_capitan_y_el_grumete__destino_o_libre_albedrio__la_oruga__asamblea_en_la_carpinteria__el_aborto_un_cuento_de_horror_
2021-04-12	Antes de intentar arreglar algo hay que ver por qué se ha roto, porque si lo arreglas mal se volverá a romper, pero sino arreglas el verdadero problema, también se romperá.	_arreglar_al_mundo__asamblea_en_la_carpinteria__nestor_el_castor__calidad_emocional__el_valor_de_un_billete_de_100_
2021-04-12	Bien, aunque un poco agobiada porque se me ha olvidado unos deberes y porque no he estudiado para varios exámenes.	_frustracion__humillacion__fortaleza__diversion__calma_
2021-04-12	Sí
2021-04-12	Sí
2021-04-12	Sí, estoy de acuerdo con que los temas psicológicos mencionados son el tema del libro. Mas añadiría el “estrés/ansiedad”, sufrida por el padre al no encontrar la manera de arreglar el mundo.	_el_capitan_y_el_grumete__destino_o_libre_albedrio__entrevista_a_dios__carlota_y_su_mochila__deja_la_cuchara_
2021-04-12	Sí.
2021-04-12	Creo que trabajo	_un_payaso_muy_inquieto__carlota_y_su_mochila__la_oruga__una_sonrisa__el_acoso_a_marita_cuento_para_hablar_sobre_el_bullying_con_los_ninyos_
2021-04-12	Enseña que hay que ser más amable con la gente	_entrevista_a_dios__leyenda_china__el_capitan_y_el_grumete__una_taza_de_te__bordados_de_la_vida_
2021-04-12	Estoy agobiada porque creo que una amiga se está alejando de mi.	_frustracion__alegria__calma__malestar__tristeza_
2021-04-12	Estoy de acuerdo	_destino_o_libre_albedrio__asamblea_en_la_carpinteria_
2021-04-12	Hay un poco de frustración porque yo siempre he estado a su lado y no quiero que se aleje	_arrogancia__duda__ira__frustracion__deseo_
2021-04-12	Nada
2021-04-12	no
2021-04-12	No conocía nada
2021-04-12	No hay nada más que contar
2021-04-12	No
2021-04-12	Para ayudar a otros	_las_mejores_semillas__el_amor_y_el_tiempo__el_alacran__un_payaso_muy_inquieto__sacudete_
2021-04-12	Que el amor es lo más importante y lo que la gente suele necesitar más.	_entrevista_a_dios__un_payaso_muy_inquieto__necesito_un_abrazo__una_sonrisa__te_compro_1_hora_
2021-04-12	Si
2021-04-12	Si
2021-04-12	Si
2021-04-12	si
2021-04-12	si
2021-04-12	Sigo hablando	_humillacion__fortaleza__ira__certeza__tristeza_
2021-04-12	Sigo hablando	_humillacion__fortaleza__ira__certeza__tristeza_
2021-04-12	Trabajo	_un_payaso_muy_inquieto__el_acoso_a_marita_cuento_para_hablar_sobre_el_bullying_con_los_ninyos__el_arbol_confundido__carlota_y_su_mochila__la_fabula_del_helecho_y_el_bambu_
2021-04-12	un especialista	_un_vaso_de_leche_
2021-04-12	Yo diría que amor	_un_payaso_muy_inquieto__te_compro_1_hora__un_vaso_de_leche__dr_alexander_fleming__los_ingredientes_del_bizcocho_
2021-04-12	Al final cuando acaba escogiendo el segundo cuadro.	_paz_en_medio_de_las_dificultades__necesito_un_abrazo__pedro_y_el_hilo_magico__la_fabula_del_lapiz__amar_lo_que_somos_
2021-04-12	No
2021-04-12	Paz significa que tú estés bien contigo mismo sin “importar” como esté el exterior.	_la_fabula_del_lapiz__un_payaso_muy_inquieto__paz_en_medio_de_las_dificultades__las_cuatro_velas__los_lobos_
2021-04-12	Si
2021-04-12	Si
2021-04-12	Si
2021-04-12	Si
2021-04-12	Si
2021-04-12	Si
2021-04-12	trabajo	_un_payaso_muy_inquieto__el_acoso_a_marita_cuento_para_hablar_sobre_el_bullying_con_los_ninyos__el_arbol_confundido__carlota_y_su_mochila__la_fabula_del_helecho_y_el_bambu_
2021-04-12	Yo opino que este cuento trata de calma e igual incluye un poco de tensión.	_paz_en_medio_de_las_dificultades__deja_la_cuchara__la_ofensa__el_capitan_y_el_grumete__entrevista_a_dios_
2021-04-12	A algún compañero	_el_tren_de_la_vida__triple_filtro__un_payaso_muy_inquieto__el_acoso_a_marita_cuento_para_hablar_sobre_el_bullying_con_los_ninyos_
2021-04-12	Aunque nos cueste la subida de la montaña las vistas desde la cima son geniales	_un_payaso_muy_inquieto__paz_en_medio_de_las_dificultades__la_oruga__el_amor_y_el_tiempo__el_acoso_a_marita_cuento_para_hablar_sobre_el_bullying_con_los_ninyos_
2021-04-12	De la superación
2021-04-12	Educación	_los_lobos__te_compro_1_hora__semillas__la_ofensa__el_arbol_de_manzanas_
2021-04-12	Frustración	_amar_lo_que_somos__leyenda_china__las_cuatro_velas__el_balde_chino__el_ingenio_de_una_hormiga_
2021-04-12	La parte cuando llega el mensajero y ayuda a sueño	_el_aborto_un_cuento_de_horror__suenyo__carlota_y_su_mochila__un_payaso_muy_inquieto__el_tren_de_la_vida_
2021-04-12	Me caen bien todo	_dr_alexander_fleming__un_payaso_muy_inquieto__paz_en_medio_de_las_dificultades__el_alacran__construir_el_puente_
2021-04-12	No es así estoy feliz y esto cansada
2021-04-12	No
2021-04-12	No
2021-04-12	No
2021-04-12	Por que el tema del que trata lo intentamos lograr	_el_capitan_y_el_grumete__la_oruga__destino_o_libre_albedrio__el_arbol_confundido__las_dos_ranas_
2021-04-12	Si
2021-04-12	Si
2021-04-12	si por que algunas veces el mensajero no llega	_suenyo__el_aborto_un_cuento_de_horror_
2021-04-12	Si
2021-04-12	Si
2021-04-12	Si
2021-04-12	Si
2021-04-12	Si
2021-04-12	Si
2021-04-12	Tengo sueño	_tristeza__agotamiento__placer__agrado__ira_
2021-04-12	“Paz no significa estar en un lugar donde no hay batallas, problemas ni peleas. Paz significa estar a gusto en ese lugar, aunque haya problemas batallas, problemas o peleas, eso es La Paz”	_los_lobos__paz_en_medio_de_las_dificultades__el_aborto_un_cuento_de_horror__un_payaso_muy_inquieto__deja_la_cuchara_
2021-04-12	Aprender lo que es La Paz	_el_aborto_un_cuento_de_horror__necesito_un_abrazo__un_payaso_muy_inquieto__el_amor_y_el_tiempo__el_tren_de_la_vida_
2021-04-12	Casi nunca, pero a veces sí	_carlota_y_su_mochila__el_acoso_a_marita_cuento_para_hablar_sobre_el_bullying_con_los_ninyos__el_capitan_y_el_grumete__el_arbol_de_los_problemas__triple_filtro_
2021-04-12	En que esté más tranquila	_deja_la_cuchara__paz_en_medio_de_las_dificultades__el_tren_de_la_vida__carlota_y_su_mochila__el_acoso_a_marita_cuento_para_hablar_sobre_el_bullying_con_los_ninyos_
2021-04-12	Estoy con agrado y diversión	_agrado__placer__diversion__satisfaccion__alegria_
2021-04-12	Estoy tranquila, feliz y calmada	_alegria__calma_
2021-04-12	No
2021-04-12	Placer y agrado	_nestor_el_castor_
2021-04-12	Ser feliz es una de las virtudes que más aprecio, y cuando mis familiares o amigos están tristes los intento consolar	_alegria__tristeza__frustracion__amor__ira_
2021-04-12	Si
2021-04-12	Sí
2021-04-12	Sí
2021-04-12	Sí
2021-04-12	Sí
2021-04-12	Sí
2021-04-12	Sí, 9	_valentia__alegria__miedo_
2021-04-12	Trabajo y educación	_carlota_y_su_mochila__arreglar_al_mundo__nestor_el_castor__te_compro_1_hora__bordados_de_la_vida_
2021-04-12	Me estreso con los exámenes y cuando estoy con mis amigas	_tristeza__alegria__calma__duda__miedo_
2021-04-12	No cambiaria nada porque me parece bien, para mí la moraleja es la misma: que La Paz no es un lugar sin problemas... si no un lugar que si estás en medio de todas esas cosas permaneces calmado.	_nestor_el_castor__un_payaso_muy_inquieto__las_cuatro_velas__la_fabula_del_lapiz__los_lobos_
2021-04-12	No creo que
2021-04-12	para ayudar a otros	_las_mejores_semillas__el_amor_y_el_tiempo__el_alacran__un_payaso_muy_inquieto__sacudete_
2021-04-12	Pues me estreso con todo
2021-04-12	Qué es una buena elección y acabo de aprender algo muy importante	_pedro_y_el_hilo_magico__un_payaso_muy_inquieto__necesito_un_abrazo__las_dos_ranas__entrevista_a_dios_
2021-04-12	Sí
2021-04-12	Sí pero además añadiría certeza	_almuerzo_con_dios__cuando_el_viento_sopla__triple_filtro__la_oruga__arreglar_al_mundo_
2021-04-12	Sí
2021-04-12	Sí
2021-04-12	Sí
2021-04-12	Si, porque yo me estreso mucho a veces y también habría elegido ese cuadro	_paz_en_medio_de_las_dificultades__necesito_un_abrazo__carlota_y_su_mochila__el_acoso_a_marita_cuento_para_hablar_sobre_el_bullying_con_los_ninyos__el_capitan_y_el_grumete_
2021-04-12	un joven	_un_vaso_de_leche__el_arbol_de_manzanas__te_compro_1_hora__almuerzo_con_dios__la_ofensa_
2021-04-12	Haber no trabajo de trabajar como en informática o así, si no de trabajar sobre la felicidad de cada uno, ya que muchas veces cuesta.	_carlota_y_su_mochila__una_sonrisa__las_mejores_semillas__suenyo__un_payaso_muy_inquieto_
2021-04-12	Hoy me siento muy bien
2021-04-12	La verdad es que no, no tengo emociones de humillación, la verdad no se porque no siento que nadie me juzgue.	_certeza__duda__tristeza_
2021-04-12	La verdad no cambiaría nada, ya que esta muy bien redactada y explica todo muy bien, ya que es verdad que el amor es lo más barato, pero más valioso a la vez, y es verdad.	_los_dientes_del_sultan__los_lobos__triple_filtro__la_fabula_del_lapiz__entrevista_a_dios_
2021-04-12	Si
2021-04-12	Si
2021-04-12	Sigo hablando	_humillacion__fortaleza__ira__certeza__tristeza_
2021-04-12	creo que el cuento es acertado con las emociones de calma y tensión.	_deja_la_cuchara__paz_en_medio_de_las_dificultades__la_ofensa__el_capitan_y_el_grumete__el_tren_de_la_vida_
2021-04-12	Estoy de acuerdo	_destino_o_libre_albedrio__asamblea_en_la_carpinteria_
2021-04-12	estoy de acuerdo	_destino_o_libre_albedrio__asamblea_en_la_carpinteria_
2021-04-12	Estoy estresada	_tension_
2021-04-12	Hay veces que dejamos que nuestras emociones y sentimientos nos nublen la cabeza y hagamos las cosas sin pensar.	_un_payaso_muy_inquieto__destino_o_libre_albedrio__carlota_y_su_mochila__la_ofensa__dr_alexander_fleming_
2021-04-12	Si
2021-04-12	si
2021-04-12	Si; creo que normalmente estoy estresada y me identifico un poco con este cuento	_el_capitan_y_el_grumete__deja_la_cuchara__paz_en_medio_de_las_dificultades__la_ofensa__entrevista_a_dios_
2021-04-12	simplemente es a causa de los exámenes y el estudio	_duda__miedo__tristeza__dolor__tension_
2021-04-12	Tambien podría tratar sobre el estrés de la persona	_el_capitan_y_el_grumete__paz_en_medio_de_las_dificultades__entrevista_a_dios__la_ofensa__deja_la_cuchara_
2021-04-12	A mi me cae mejor la hija de el monikers y no me gusta, Rumpelstiltskin	_el_aborto_un_cuento_de_horror__pedro_y_el_hilo_magico__dr_alexander_fleming__arreglar_al_mundo__entrevista_a_dios_
2021-04-12	Enseña que no tomes el camino fácil porque no estes en el futuro porque cuando llegue des momento te arrepintieras	_una_taza_de_te__semillas__un_vaso_de_leche_
2021-04-12	Estoy mal
2021-04-12	No he tenido
2021-04-12	No
2021-04-12	no
2021-04-12	no
2021-04-12	no
2021-04-12	no
2021-04-12	Si
2021-04-12	Si y no
2021-04-12	Si
2021-04-12	Si
2021-04-12	Si
2021-04-12	Si
2021-04-12	si
2021-04-12	si
2021-04-12	Vale	_una_sonrisa__el_valor_de_un_billete_de_100_
2021-04-12	Yo creo que si	_el_tren_de_la_vida__el_capitan_y_el_grumete__bordados_de_la_vida__un_payaso_muy_inquieto__una_sonrisa_
2021-04-12	A la gente que quiere lograr sus metas para que tengan mas motivación y trabajo	_suenyo__entrevista_a_dios__leyenda_china__el_valor_de_un_billete_de_100__reflejo_de_tus_actos_
2021-04-12	Hoy tengo un poco de estrés ya que se me ha olvidado hacer la redacción de francés, pero por lo demás me encuentro bastante bien, estoy bastante alegre 😃	_tristeza__entusiasmo__alegria__frustracion__tension_
2021-04-12	Las personas que persiguen su sueño	_la_oruga__carlota_y_su_mochila__el_tren_de_la_vida__pedro_y_el_hilo_magico__el_aborto_un_cuento_de_horror_
2021-04-12	No
2021-04-12	Por que te da motivación para perseguir tus sueños	_pedro_y_el_hilo_magico__el_tren_de_la_vida__suenyo__un_payaso_muy_inquieto__los_dientes_del_sultan_
2021-04-12	Pues a logrado muy bien enviar el mensaje a los lectores	_el_valor_de_un_billete_de_100__un_vaso_de_leche__los_ingredientes_del_bizcocho__el_arbol_confundido__las_dos_ranas_
2021-04-12	Si porque se empeña en trabajar por sus sueños	_suenyo__la_oruga__carlota_y_su_mochila__un_payaso_muy_inquieto__los_dientes_del_sultan_
2021-04-12	Si se lo recomiendo a otra persona	_el_capitan_y_el_grumete__la_oruga__carlota_y_su_mochila__necesito_un_abrazo__los_ingredientes_del_bizcocho_
2021-04-12	Si ya que logra perseguir sus sueños aunque los demás se lo intenten impedir y lo hace con mucha alegría ya que es lo que él soñaba	_la_oruga__el_tren_de_la_vida__pedro_y_el_hilo_magico__los_dientes_del_sultan__carlota_y_su_mochila_
2021-04-12	Si
2021-04-12	Si
2021-04-12	Si
2021-04-12	Si
2021-04-12	Supongo que se refiere a que persigas tus sueños	_pedro_y_el_hilo_magico__el_aborto_un_cuento_de_horror__el_tren_de_la_vida__carlota_y_su_mochila__un_payaso_muy_inquieto_
2021-04-12	.
2021-04-12	.
2021-04-12	deseo y frustración	_amar_lo_que_somos__el_capitan_y_el_grumete__las_siete_tinajas_de_oro__dinero__te_compro_1_hora_
2021-04-12	Estoy cansado	_agotamiento__aburrimiento_
2021-04-12	Me gusta el estudiante de Zenón	_deja_la_cuchara_
2021-04-12	me he despertado muy temprano	_ira_
2021-04-12	No
2021-04-12	No
2021-04-12	no
2021-04-12	no
2021-04-12	no
2021-04-12	Si
2021-04-12	Si
2021-04-12	Si
2021-04-12	si
2021-04-12	Si
2021-04-12	A lo mejor	_pedro_y_el_hilo_magico__el_capitan_y_el_grumete__asamblea_en_la_carpinteria__carlota_y_su_mochila__triple_filtro_
2021-04-12	Al tipo de personas que pone al principio	_el_valor_de_un_billete_de_100__sacudete__construir_el_puente__arreglar_al_mundo__pedro_y_el_hilo_magico_
2021-04-12	Depende de en qué país estés	_los_dientes_del_sultan__destino_o_libre_albedrio__la_fabula_del_lapiz__las_mejores_semillas__deja_la_cuchara_
2021-04-12	El que?
2021-04-12	El que?
2021-04-12	me imagino que si	_el_capitan_y_el_grumete_
2021-04-12	nada
2021-04-12	Ninguna
2021-04-12	Ninguno me cae ni bien ni mal	_dr_alexander_fleming__un_payaso_muy_inquieto__paz_en_medio_de_las_dificultades__el_alacran__construir_el_puente_
2021-04-12	ninguno
2021-04-12	ningunos
2021-04-12	no gracias	_un_vaso_de_leche__la_ofensa__las_siete_tinajas_de_oro__las_dos_vasijas_de_agua__triple_filtro_
2021-04-12	No se
2021-04-12	No se
2021-04-12	No se
2021-04-12	No se
2021-04-12	no se
2021-04-12	No se
2021-04-12	No
2021-04-12	no
2021-04-12	no
2021-04-12	no
2021-04-12	No
2021-04-12	no
2021-04-12	no
2021-04-12	para ayudar a otros	_las_mejores_semillas__el_amor_y_el_tiempo__el_alacran__un_payaso_muy_inquieto__sacudete_
2021-04-12	puede	_asamblea_en_la_carpinteria__el_arbol_de_los_problemas__arreglar_al_mundo__las_dos_vasijas_de_agua__paz_en_medio_de_las_dificultades_
2021-04-12	quien sea
2021-04-12	Si
2021-04-12	si
2021-04-12	Si
2021-04-12	si
2021-04-12	Si
2021-04-12	si
2021-04-12	Todas por igual
2021-04-12	Vale	_una_sonrisa__el_valor_de_un_billete_de_100_
2021-04-12	10 y si	_alegria__diversion__ira_
2021-04-12	A mis amigos	_la_oruga__entrevista_a_dios__el_tren_de_la_vida__suenyo__pedro_y_el_hilo_magico_
2021-04-12	Aburrimiento, agotamiento, apatía, compasión, humillación y tensión	_pedro_y_el_hilo_magico__el_valor_de_un_billete_de_100__arreglar_al_mundo__deja_la_cuchara__paz_en_medio_de_las_dificultades_
2021-04-12	Cuando se
2021-04-12	De acuerdo	_certeza_
2021-04-12	El esfuerzo, y si necesitamos más fuerza y vigor para afrontar el dia	_fortaleza__frustracion__entusiasmo__alegria__agotamiento_
2021-04-12	Estoy genial	_alegria_
2021-04-12	Estoy muy bien
2021-04-12	Hoy estoy cansado	_agotamiento__aburrimiento_
2021-04-12	La importancia maxima	_miedo__calma__valentia__fobia__arrogancia_
2021-04-12	Me gustan los trenes	_agrado__placer__miedo__frustracion_
2021-04-12	Me identifico con trabajador	_carlota_y_su_mochila__entrevista_a_dios__construir_el_puente__el_valor_de_un_billete_de_100__nestor_el_castor_
2021-04-12	No
2021-04-12	No
2021-04-12	No
2021-04-12	No
2021-04-12	No, y si etoy
2021-04-12	No, y si etoy
2021-04-12	Ok
2021-04-12	Ok
2021-04-12	Para que trabajen porque algunos son muy vagos	_carlota_y_su_mochila__necesito_un_abrazo__el_arbol_confundido__entrevista_a_dios__el_valor_de_un_billete_de_100_
2021-04-12	Recom Nadir cuento	_apatia__frustracion_
2021-04-12	Se me ha pasado por la cabeza que sus amigos eran muy vagos y no me evoca nada	_destino_o_libre_albedrio__un_payaso_muy_inquieto__suenyo__el_tren_de_la_vida__el_valor_de_un_billete_de_100_
2021-04-12	Si
2021-04-12	Si
2021-04-12	Si
2021-04-12	Si
2021-04-12	si
2021-04-12	Si
2021-04-12	Si
2021-04-12	Si
2021-04-12	Si, menos en lo de diversión	_nestor_el_castor__una_sonrisa_
2021-04-12	Si, y si me gustan	_agrado__placer__miedo__frustracion_
2021-04-12	Simplemente eso aunque he dormido poco
2021-04-12	Simplemente tengo sueño	_tristeza__agotamiento__placer__agrado__ira_
2021-04-12	Tengo debilidad	_ira__fortaleza__frustracion__agrado__agotamiento_
2021-04-12	Yo creo que lo que el autor dice está bien	_arreglar_al_mundo__un_payaso_muy_inquieto__carlota_y_su_mochila__el_capitan_y_el_grumete__semillas_
2021-04-12	Yo creo que no trata de nada más	_el_tren_de_la_vida__el_capitan_y_el_grumete__bordados_de_la_vida__un_payaso_muy_inquieto__una_sonrisa_
2021-04-12	Yo diríamos: sin esfuerzo y sacrificio no se consigue nada	_nestor_el_castor__las_dos_ranas__la_ultima_casa_del_carpintero__estrellas_de_mar_en_la_playa__la_oruga_
2021-04-12	Ahora mismo estoy bien pero triste a la vez porque hecho de menos a una persona muy importante que vive lejos , por lo demás estoy muy bien	_frustracion__tristeza__entusiasmo__diversion__tension_
2021-04-12	No no estoy frustrada sólo triste y feliz	_frustracion__alegria__tristeza_
2021-04-12	No solo trata sobre el amor , la tristeza , del terror ( miedo )	_el_aborto_un_cuento_de_horror__el_capitan_y_el_grumete__el_amor_y_el_tiempo__el_acoso_a_marita_cuento_para_hablar_sobre_el_bullying_con_los_ninyos__un_payaso_muy_inquieto_
2021-04-12	No trata de nada más
2021-04-12	No yo estoy bien solo triste pero no estoy frustrada ni nada	_frustracion__tristeza_
2021-04-12	Si
2021-04-12	Si estoy muy de acuerdo	_destino_o_libre_albedrio__asamblea_en_la_carpinteria_
2021-04-12	Si
2021-04-12	Sii
2021-04-12	Yo no cambiaría nada ni añadiría nada esta muy bien no se como expresaría mi moraleja
2021-04-12	Ansiedad	_deja_la_cuchara__paz_en_medio_de_las_dificultades__el_capitan_y_el_grumete__entrevista_a_dios_
2021-04-12	Bueno, estoy bien, está claro que enfadarse no es bueno, pero la verdad es que estoy bien	_malestar__ira__amor__entusiasmo__placer_
2021-04-12	Bueno, pues la verdad es que tengo que evitar enfadarme tanto, y relajarme más	_malestar__ira__certeza__tristeza__duda_
2021-04-12	El estudiante de zen	_deja_la_cuchara_
2021-04-12	Frustración	_amar_lo_que_somos__leyenda_china__las_cuatro_velas__el_balde_chino__el_ingenio_de_una_hormiga_
2021-04-12	La mente es muy difícil controlarla, muchas veces no quieres pensar en algo o simplemente pensar, pero no puedes evitarlo, pero quizás si centras tu mente en otra cosa, puedes lograr evitar los pensamientos que no quieres	_deja_la_cuchara__la_ofensa__un_payaso_muy_inquieto__sacudete__entrevista_a_dios_
2021-04-12	Lo mismo	_carlota_y_su_mochila__el_acoso_a_marita_cuento_para_hablar_sobre_el_bullying_con_los_ninyos__pedro_y_el_hilo_magico__el_capitan_y_el_grumete__un_payaso_muy_inquieto_
2021-04-12	Pues estoy tranquilo, un poco incómodo	_malestar__calma__entusiasmo_
2021-04-12	Que aunque a veces te puede frustrar algo, debes relajarte, y pensar en otra cosa	_el_capitan_y_el_grumete__bordados_de_la_vida__asamblea_en_la_carpinteria__carlota_y_su_mochila__el_arbol_de_los_problemas_
2021-04-12	Sí
2021-04-12	Sí
2021-04-12	Sí
2021-04-12	Sí
2021-04-12	Sí
2021-04-12	Sí
2021-04-12	Sí, algo parecido	_bordados_de_la_vida__calidad_emocional__carlota_y_su_mochila__los_ingredientes_del_bizcocho__el_amor_y_el_tiempo_
2021-04-12	al abuelo	_los_ingredientes_del_bizcocho__la_fabula_del_lapiz__los_lobos__el_tren_de_la_vida__almuerzo_con_dios_
2021-04-12	Algún amigo	_la_oruga__entrevista_a_dios__el_tren_de_la_vida__suenyo__pedro_y_el_hilo_magico_
2021-04-12	Me identifico cuando preguntaron al abuelo	_los_lobos__la_fabula_del_lapiz__almuerzo_con_dios__los_ingredientes_del_bizcocho__necesito_un_abrazo_
2021-04-12	No , el día de hoy estoy feliz	_alegria_
2021-04-12	No
2021-04-12	No
2021-04-12	No
2021-04-12	para aprender de la educación	_carlota_y_su_mochila__entrevista_a_dios__una_taza_de_te__amar_lo_que_somos__los_ingredientes_del_bizcocho_
2021-04-12	Por la simpatía
2021-04-12	Pues ser feliz es la pieza fundamental de la vida	_alegria__placer_
2021-04-12	Q somos libres para elegir que sentir	_destino_o_libre_albedrio__los_lobos__carlota_y_su_mochila__un_payaso_muy_inquieto__suenyo_
2021-04-12	Ser feliz es la pieza fundamental de la vida	_alegria__placer_
2021-04-12	Si estoy de acuerdo	_destino_o_libre_albedrio__asamblea_en_la_carpinteria_
2021-04-12	Si estoy de acuerdo q trata con educación	_asamblea_en_la_carpinteria__destino_o_libre_albedrio__la_ofensa__el_arbol_de_manzanas__dr_alexander_fleming_
2021-04-12	Si lo resume muy bien	_entrevista_a_dios_
2021-04-12	Si me considero feliz	_alegria_
2021-04-12	Si por la educación	_los_lobos__te_compro_1_hora__semillas__la_ofensa__el_arbol_de_manzanas_
2021-04-12	Si
2021-04-12	Si
2021-04-12	Si
2021-04-12	si
2021-04-12	si
2021-04-12	si
2021-04-12	si
2021-04-12	Si
2021-04-12	Si
2021-04-12	Si,con alegría	_una_sonrisa__los_lobos__el_amor_y_el_tiempo__el_arbol_confundido__un_vaso_de_leche_
2021-04-12	La segunda respuesta de Dios	_la_fabula_del_lapiz__las_cuatro_velas__cuando_el_viento_sopla__calidad_emocional__la_ofensa_
2021-04-12	Me preocupa el examen de mañana que no tengo ni idea y como jugué el domingo el partido de baloncesto, regular, casi pierdo el bus y todavía no he desayunado nada	_duda__miedo__tristeza_
2021-04-12	Ninguno
2021-04-12	No
2021-04-12	No estoy de acuerdo que trate sobre el agotamiento ni sobre la fortaleza.
2021-04-12	no se identifica pero si le ayudaría	_las_mejores_semillas__el_amor_y_el_tiempo__el_alacran__un_payaso_muy_inquieto__sacudete_
2021-04-12	No, te has desviado del tema compi	_humillacion__arrogancia__amor_
2021-04-12	Sí
2021-04-12	Sí
2021-04-12	Sí
2021-04-12	Sí, creo que trata todo eso.	_el_tren_de_la_vida__el_capitan_y_el_grumete__bordados_de_la_vida__un_payaso_muy_inquieto__una_sonrisa_
2021-04-12	Sí, también, también, a la gente no se pero a mí mucho. Buena frase	_amor__diversion__frustracion__deseo__aburrimiento_
2021-04-12	Sí, tanto Dios como el entrevistador	_los_ingredientes_del_bizcocho__almuerzo_con_dios__el_arbol_confundido__un_vaso_de_leche__la_fabula_del_lapiz_
2021-04-12	?
2021-04-12	?
2021-04-12	?
2021-04-12	a algunos de mis amigas/os?	_el_acoso_a_marita_cuento_para_hablar_sobre_el_bullying_con_los_ninyos__la_oruga__entrevista_a_dios__el_tren_de_la_vida__suenyo_
2021-04-12	algunas cosas	_la_fabula_del_lapiz__los_dientes_del_sultan__calidad_emocional__los_ingredientes_del_bizcocho__te_compro_1_hora_
2021-04-12	cambiaria
2021-04-12	el cuento está bien me gusta bastante	_nestor_el_castor__las_siete_tinajas_de_oro__la_fabula_del_lapiz__paz_en_medio_de_las_dificultades__semillas_
2021-04-12	el medio	_el_balde_chino__las_siete_tinajas_de_oro__cuando_el_viento_sopla__arreglar_al_mundo_
2021-04-12	em
2021-04-12	N
2021-04-12	no jaja
2021-04-12	no
2021-04-12	nose
2021-04-12	nose
2021-04-12	Nose
2021-04-12	para descansar de todo	_el_arbol_de_manzanas__la_ofensa__necesito_un_abrazo__la_oruga__pedro_y_el_hilo_magico_
2021-04-12	para saber como piensan gente y para relagar	_entrevista_a_dios__el_capitan_y_el_grumete__leyenda_china__el_tren_de_la_vida__paz_en_medio_de_las_dificultades_
2021-04-12	porque le gusta leer y pues si	_nestor_el_castor__las_siete_tinajas_de_oro__la_fabula_del_lapiz__paz_en_medio_de_las_dificultades__semillas_
2021-04-12	pues memorias de familia	_dr_alexander_fleming__la_ultima_casa_del_carpintero__las_siete_tinajas_de_oro__carlota_y_su_mochila__el_arbol_de_manzanas_
2021-04-12	que
2021-04-12	Que
2021-04-12	que
2021-04-12	Si
2021-04-12	si
2021-04-12	si resume bien	_entrevista_a_dios_
2021-04-12	Si
2021-04-12	Si
2021-04-12	Si
2021-04-12	si
2021-04-12	si
2021-04-12	si
2021-04-12	si
2021-04-12	si
2021-04-12	si
2021-04-12	si
2021-04-12	Si.
2021-04-12	Uhm mejor no decir
2021-04-12	un adulto	_pedro_y_el_hilo_magico_
2021-04-12	8	_valentia__tristeza__diversion_
2021-04-12	Ayer me lo pasé genial, quedé con mis amigas	_alegria__tristeza__calma__aburrimiento__duda_
2021-04-12	Creo que este cuento trata la alegría, tristeza, amor, agrado...	_nestor_el_castor__una_sonrisa__el_amor_y_el_tiempo__el_tren_de_la_vida__un_payaso_muy_inquieto_
2021-04-12	La verdad es que hoy estoy cansada porque ayer me quedé hasta tarde haciendo deberes	_duda__certeza__aburrimiento__tristeza__agotamiento_
2021-04-12	No, solo tengo sueño, pero porque es muy pronto todavía	_tristeza__agotamiento__placer__agrado__ira_
2021-04-12	Sí
2021-04-12	Sí
2021-04-12	Sí
2021-04-12	Yo cambiaría el final, así: ‘Lo más valioso del mundo es el amor, y al mismo tiempo lo más “barato”. Los sentimientos que les mostramos a los demás suelen ser de vuelta, tanto positivos como negativos’.	_una_sonrisa__los_lobos__un_payaso_muy_inquieto__pedro_y_el_hilo_magico__el_amor_y_el_tiempo_
2021-04-12	Con calma	_deja_la_cuchara__paz_en_medio_de_las_dificultades_
2021-04-12	cuando soltaba el globo en la feria de pequeño	_las_mejores_semillas__la_oruga__el_alacran__pedro_y_el_hilo_magico__el_valor_de_un_billete_de_100_
2021-04-12	de donde eres
2021-04-12	Educación estrés trabajo timidez adolescencia	_la_ofensa__te_compro_1_hora__el_acoso_a_marita_cuento_para_hablar_sobre_el_bullying_con_los_ninyos__el_capitan_y_el_grumete__entrevista_a_dios_
2021-04-12	En absoluto	_paz_en_medio_de_las_dificultades__el_capitan_y_el_grumete_
2021-04-12	en efecto	_las_dos_ranas__las_siete_tinajas_de_oro_
2021-04-12	exacto	_asamblea_en_la_carpinteria_
2021-04-12	lo mismo	_carlota_y_su_mochila__el_acoso_a_marita_cuento_para_hablar_sobre_el_bullying_con_los_ninyos__pedro_y_el_hilo_magico__el_capitan_y_el_grumete__un_payaso_muy_inquieto_
2021-04-12	mmm podría	_asamblea_en_la_carpinteria__el_arbol_de_los_problemas__arreglar_al_mundo__las_dos_vasijas_de_agua__paz_en_medio_de_las_dificultades_
2021-04-12	mmm si, seguramente
2021-04-12	ninguna
2021-04-12	No
2021-04-12	no
2021-04-12	no
2021-04-12	no
2021-04-12	no
2021-04-12	no se
2021-04-12	no tiene utilidad
2021-04-12	No
2021-04-12	no
2021-04-12	ns
2021-04-12	Oye me siento muy bien
2021-04-12	para matar el aburrimiento	_arreglar_al_mundo__pedro_y_el_hilo_magico_
2021-04-12	ps estoy feliz ns porq	_el_arbol_de_los_problemas__semillas__el_tren_de_la_vida__sacudete__un_vaso_de_leche_
2021-04-12	puede ser	_asamblea_en_la_carpinteria__el_arbol_de_los_problemas__arreglar_al_mundo__las_dos_vasijas_de_agua__paz_en_medio_de_las_dificultades_
2021-04-12	pues q no tiene mucho sentido
2021-04-12	pues que no sabia porq me estaba hablando de una cuchara pero ya dsps cuando lo leí otra vez ya me di cuenta	_deja_la_cuchara__carlota_y_su_mochila__el_acoso_a_marita_cuento_para_hablar_sobre_el_bullying_con_los_ninyos__un_payaso_muy_inquieto__los_ingredientes_del_bizcocho_
2021-04-12	Sham
2021-04-12	Si
2021-04-12	Si
2021-04-12	Si
2021-04-12	si
2021-04-12	Si
2021-04-12	si
2021-04-12	si
2021-04-12	Siam’s	_entrevista_a_dios__deja_la_cuchara__pedro_y_el_hilo_magico__la_fabula_del_lapiz__el_valor_de_un_billete_de_100_
2021-04-12	sii
2021-04-12	slala
2021-04-12	Tengo sueño	_los_dientes_del_sultan__el_aborto_un_cuento_de_horror__el_tren_de_la_vida__la_oruga__pedro_y_el_hilo_magico_
2021-04-12	tiene sus pros	_el_valor_de_un_billete_de_100__reflejo_de_tus_actos__bordados_de_la_vida__calidad_emocional__la_ultima_casa_del_carpintero_
2021-04-12	un abuelo	_los_ingredientes_del_bizcocho__la_fabula_del_lapiz__los_lobos__el_tren_de_la_vida__almuerzo_con_dios_
2021-04-12	estoy clamado porque no tengo exámenes
2021-04-12	Estoy calmado porque ya no tengo más exemenes	_calma_
2021-04-12	estoy feliz porque no tengo trabajo	_alegria_
2021-04-12	lo cambiaría diciendo que si ciertamente es lo más difícil de manejar nuestra mente porque con que te lo digas una y otra vez no funciona, hay que convencerse a uno mismo	_deja_la_cuchara__calidad_emocional__destino_o_libre_albedrio__el_alacran__un_payaso_muy_inquieto_
2021-04-12	no me siento identificado porque realmente no me pasa nada de ello	_construir_el_puente__un_payaso_muy_inquieto__el_aborto_un_cuento_de_horror__destino_o_libre_albedrio__el_arbol_de_los_problemas_
2021-04-12	no
2021-04-12	no
2021-04-12	no
2021-04-12	si creo que alguien habrá	_el_tren_de_la_vida__el_capitan_y_el_grumete__bordados_de_la_vida__un_payaso_muy_inquieto__una_sonrisa_
2021-04-12	Si estoy de acierdo
2021-04-12	Si
2021-04-12	si
2021-04-12	Bueno que te puede hacer reflexionar	_arreglar_al_mundo__el_balde_chino__destino_o_libre_albedrio__te_compro_1_hora__las_dos_vasijas_de_agua_
2021-04-12	Creo que si	_el_tren_de_la_vida__el_capitan_y_el_grumete__bordados_de_la_vida__un_payaso_muy_inquieto__una_sonrisa_
2021-04-12	Creo que trataría de calma y tensión	_paz_en_medio_de_las_dificultades__deja_la_cuchara__el_capitan_y_el_grumete__la_ofensa__entrevista_a_dios_
2021-04-12	Desconsuelo	_tristeza__dolor_
2021-04-12	Mi argumento a favor es que lo que dice el autor es cierto porque la moraleja que pone de La Paz es bonito	_carlota_y_su_mochila__el_aborto_un_cuento_de_horror__la_ultima_casa_del_carpintero__nestor_el_castor__el_amor_y_el_tiempo_
2021-04-12	No no hay algo que me preocupe , de momento el día me esta yendo bien	_tristeza__frustracion__arrogancia__ira__humillacion_
2021-04-12	No estoy teniendo muchas emociones de tristeza pero estoy teniendo poca energía últimamente
2021-04-12	No he sentido asombro y ninguna sorpresa divertida
2021-04-12	No la gente para mi sigue igual	_diversion__ira__frustracion__odio__tristeza_
2021-04-12	No me recuerda nada , nada	_sacudete__necesito_un_abrazo__nestor_el_castor__el_valor_de_un_billete_de_100__los_dientes_del_sultan_
2021-04-12	No no cambiaria nada :
2021-04-12	No se
2021-04-12	No tengo más detalles
2021-04-12	No
2021-04-12	No
2021-04-12	No
2021-04-12	No
2021-04-12	Ok
2021-04-12	Por lo que recuerdo creo que no	_el_tren_de_la_vida__necesito_un_abrazo__una_sonrisa__el_valor_de_un_billete_de_100__los_dientes_del_sultan_
2021-04-12	Si
2021-04-12	Si
2021-04-12	si
2021-04-12	si
2021-04-12	Si
2021-04-12	Si, el cuento trata sobre alguna otra emoción de la mencionadas	_el_aborto_un_cuento_de_horror__la_ofensa__dr_alexander_fleming__el_tren_de_la_vida__suenyo_
2021-04-12	Si
2021-04-12	Si
2021-04-12	Calma, agotamiento y Placer	_deja_la_cuchara__paz_en_medio_de_las_dificultades__nestor_el_castor__las_cuatro_velas__las_dos_ranas_
2021-04-12	Estrés	_deja_la_cuchara__paz_en_medio_de_las_dificultades__el_capitan_y_el_grumete__entrevista_a_dios__la_ofensa_
2021-04-12	He estado muy estresado y cansados. Porque siempre estoy haciendo muchas cosas sin paras y no me gusta la mayoría de cosas que hago porque me aburren	_aburrimiento__ira__malestar__tristeza__tension_
2021-04-12	Mis interés son el volleyball y el poder estar con mis amigos	_alegria__calma__apatia__deseo__tristeza_
2021-04-12	No
2021-04-12	No, no he estado muy feliz
2021-04-12	Si
2021-04-12	Si
2021-04-12	Si
2021-04-12	Creo que me enfadó cuando me tengo que enfadar	_malestar__ira__agrado__amor__miedo_
2021-04-12	No lo sé	_pedro_y_el_hilo_magico__el_capitan_y_el_grumete__la_oruga__el_arbol_de_los_problemas__necesito_un_abrazo_
2021-04-12	No pienso que hay que enfadarse cuando alguien hace algo mal
2021-04-12	No porque el cuento es muy corto.	_los_dientes_del_sultan__el_arbol_de_manzanas__bordados_de_la_vida__necesito_un_abrazo__el_aborto_un_cuento_de_horror_
2021-04-12	No
2021-04-12	No
2021-04-12	No
2021-04-12	Si
2021-04-12	Si
2021-04-12	Si
2021-04-12	Si
2021-04-12	Sugerir cuento	_tristeza_
2021-04-12	Tengo miedo a los payasos	_malestar__fortaleza__aburrimiento__tristeza__valentia_
2021-04-12	Tensión, duda y valentía	_entrevista_a_dios__destino_o_libre_albedrio__deja_la_cuchara__paz_en_medio_de_las_dificultades__la_ofensa_
2021-04-12	No , tiene nada que ver con la humillación	_humillacion__arrogancia__amor__ira__alegria_
2021-04-12	sí
2021-04-12	Sí
2021-04-12	Sí
2021-04-12	Sí
2021-04-12	Sigue hablando	_humillacion__fortaleza__ira__certeza__tristeza_
2021-04-12	Sobre calma, angustia.	_deja_la_cuchara__paz_en_medio_de_las_dificultades__la_ofensa__el_capitan_y_el_grumete__entrevista_a_dios_
2021-04-12	En la mayoría de ocasiones, las personas no controlan lo que piensan o lo que dejan de pensar. Cuando esto pasa lo que hay que hacer es concentrarse en lo que quieres hacer.	_deja_la_cuchara__cuando_el_viento_sopla__destino_o_libre_albedrio__las_mejores_semillas__pedro_y_el_hilo_magico_
2021-04-12	Hoy me siento alegre, ya que no me ha ocurrido nada para no estarlo	_amor__alegria__diversion__tristeza__agrado_
2021-04-12	No
2021-04-12	Si
2021-04-12	Si
2021-04-12	Sí
2021-04-12	Sí
2021-04-12	Yo creo que además de calma y tensión, este cuento trata sobre valentía	_paz_en_medio_de_las_dificultades__deja_la_cuchara__el_capitan_y_el_grumete__la_ofensa__entrevista_a_dios_
2021-04-12	Yo pienso que para poder amar a alguien no es necesario tener una buena autoestima	_deseo__amor__apatia__alegria__aburrimiento_
2021-04-12	8, si	_valentia__tristeza__diversion_
2021-04-12	A algunos conocidos	_la_ofensa__triple_filtro_
2021-04-12	A veces echo en falta que me pregunten cómo estoy y hablar sobre ello	_carlota_y_su_mochila__un_payaso_muy_inquieto__los_ingredientes_del_bizcocho__la_fabula_del_helecho_y_el_bambu__el_acoso_a_marita_cuento_para_hablar_sobre_el_bullying_con_los_ninyos_
2021-04-12	Afronta la bipolaridad	_un_payaso_muy_inquieto_
2021-04-12	Algo de apatía	_tristeza__tension__aburrimiento__agrado__satisfaccion_
2021-04-12	Añadiría que cada vez que nos sintamos mal o sintamos que algo no va bien seamos capaces de expresarlo con la gente de nuestro entorno para conseguir ayuda	_almuerzo_con_dios__carlota_y_su_mochila__la_ultima_casa_del_carpintero__el_tren_de_la_vida__el_aborto_un_cuento_de_horror_
2021-04-12	Es bueno ser modesto	_amor__entusiasmo__placer__alegria__diversion_
2021-04-12	Estoy a favor de ayudar a los que lo necesitan	_el_arbol_de_manzanas__un_payaso_muy_inquieto__sacudete__el_tren_de_la_vida__carlota_y_su_mochila_
2021-04-12	Estrés/ansiedad	_deja_la_cuchara__paz_en_medio_de_las_dificultades__el_capitan_y_el_grumete__entrevista_a_dios__la_ofensa_
2021-04-12	Generalmente me encuentro bien	_tristeza__ira__placer__tension__frustracion_
2021-04-12	Gracias	_arrogancia__agrado_
2021-04-12	Hola?
2021-04-12	La parte en la que van al médico	_un_payaso_muy_inquieto__dr_alexander_fleming__bordados_de_la_vida__los_ingredientes_del_bizcocho__carlota_y_su_mochila_
2021-04-12	Me ha pasado por la cabeza que realmente hay mucha gente que está mal y ni siquiera lo sabemos	_el_capitan_y_el_grumete__entrevista_a_dios__carlota_y_su_mochila__leyenda_china__destino_o_libre_albedrio_
2021-04-12	Me recuerda a una compañera de clase	_el_acoso_a_marita_cuento_para_hablar_sobre_el_bullying_con_los_ninyos__el_tren_de_la_vida__pedro_y_el_hilo_magico__amar_lo_que_somos__semillas_
2021-04-12	Ni esa perdona sabe que tiene tal problema	_entrevista_a_dios__calidad_emocional__el_arbol_de_los_problemas__el_ingenio_de_una_hormiga__paz_en_medio_de_las_dificultades_
2021-04-12	No creo
2021-04-12	No creo que pueda conectar conmigo
2021-04-12	No
2021-04-12	No
2021-04-12	No
2021-04-12	Para ayudar a otros	_las_mejores_semillas__el_amor_y_el_tiempo__el_alacran__un_payaso_muy_inquieto__sacudete_
2021-04-12	Porque están pasando por lo mismo	_un_payaso_muy_inquieto__carlota_y_su_mochila__las_dos_vasijas_de_agua__el_capitan_y_el_grumete__el_acoso_a_marita_cuento_para_hablar_sobre_el_bullying_con_los_ninyos_
2021-04-12	Si lo habría hecho, pero primero habría hablado con la persona	_la_fabula_del_helecho_y_el_bambu__los_ingredientes_del_bizcocho__carlota_y_su_mochila__almuerzo_con_dios__destino_o_libre_albedrio_
2021-04-12	Si
2021-04-12	Si
2021-04-12	Si
2021-04-12	Si
2021-04-12	Si
2021-04-12	Si
2021-04-12	Si
2021-04-12	Si
2021-04-12	Si
2021-04-12	Si
2021-04-12	Si
2021-04-12	Si
2021-04-12	Si
2021-04-12	Si
2021-04-12	Si
2021-04-12	Si, pero con la depresión no	_almuerzo_con_dios__un_payaso_muy_inquieto_
2021-04-12	También trata sobre ira, frustración y alegría	_asamblea_en_la_carpinteria__los_lobos__el_arbol_de_los_problemas__carlota_y_su_mochila__el_amor_y_el_tiempo_
2021-04-12	Transmite la compasión	_el_alacran__estrellas_de_mar_en_la_playa__dr_alexander_fleming__un_vaso_de_leche__los_lobos_
2021-04-12	Últimamente siento tensión	_agotamiento__tension_
2021-04-12	Últimamente todo mi entorno lo está pasando mal, todos tienen problemas serios y no se como ayudarles	_ira__frustracion__amor__humillacion__duda_
2021-04-12	Un especialista	_un_vaso_de_leche_
2021-04-12	a lo mejor	_pedro_y_el_hilo_magico__el_capitan_y_el_grumete__asamblea_en_la_carpinteria__carlota_y_su_mochila__triple_filtro_
2021-04-12	diria que va app	_el_acoso_a_marita_cuento_para_hablar_sobre_el_bullying_con_los_ninyos__entrevista_a_dios__la_oruga__reflejo_de_tus_actos__destino_o_libre_albedrio_
2021-04-12	Diría que va c	_arreglar_al_mundo__las_dos_vasijas_de_agua__el_acoso_a_marita_cuento_para_hablar_sobre_el_bullying_con_los_ninyos__carlota_y_su_mochila__un_vaso_de_leche_
2021-04-12	g	_una_sonrisa_
2021-04-12	hubiera be mi lo mismo	_carlota_y_su_mochila__el_acoso_a_marita_cuento_para_hablar_sobre_el_bullying_con_los_ninyos__pedro_y_el_hilo_magico__el_capitan_y_el_grumete__un_payaso_muy_inquieto_
2021-04-12	Me ha pasado lo mismo	_un_payaso_muy_inquieto__carlota_y_su_mochila__las_dos_vasijas_de_agua__el_capitan_y_el_grumete__el_acoso_a_marita_cuento_para_hablar_sobre_el_bullying_con_los_ninyos_
2021-04-12	Miedo a perder a gente importante en mi vida	_tristeza__malestar__aburrimiento__frustracion__odio_
2021-04-12	Opino lo mismo, lo más difícil de controlar es la mente y cuando ya se haya controlado es más fácil	_la_ofensa__entrevista_a_dios__un_payaso_muy_inquieto__deja_la_cuchara__calidad_emocional_
2021-04-12	Perder a gente importante	_tristeza__ira__diversion__frustracion__odio_
2021-04-12	si
2021-04-12	si
2021-04-12	Si
2021-04-12	Si
2021-04-12	Si
2021-04-12	Si
2021-04-12	si, hay veces que no dejo de pensar en algo que no debería de pensar tanto	_carlota_y_su_mochila__el_acoso_a_marita_cuento_para_hablar_sobre_el_bullying_con_los_ninyos__el_capitan_y_el_grumete__el_arbol_de_los_problemas__triple_filtro_
2021-04-12	Un estudiante de zen intenta relajarse pero no puede sacarse de las mentes pensamientos que no deja que se relajen	_deja_la_cuchara__una_taza_de_te__bordados_de_la_vida_
2021-04-12	y
2021-04-12	yo le podría otro	_asamblea_en_la_carpinteria__el_arbol_de_los_problemas__arreglar_al_mundo__las_dos_vasijas_de_agua__paz_en_medio_de_las_dificultades_
2021-04-12	No
2021-04-12	a favor	_la_ultima_casa_del_carpintero__carlota_y_su_mochila_
2021-04-12	Estrés más o menos pero nada del otro mundo	_deja_la_cuchara__paz_en_medio_de_las_dificultades__el_capitan_y_el_grumete__entrevista_a_dios__la_ofensa_
2021-04-12	Mas o menos
2021-04-12	ni
2021-04-12	No lo sé quizás	_pedro_y_el_hilo_magico__el_capitan_y_el_grumete__la_oruga__el_arbol_de_los_problemas__necesito_un_abrazo_
2021-04-12	No
2021-04-12	No,
2021-04-12	Noooooo
2021-04-12	Ns porque pero me suena a una persona divorciándose	_carlota_y_su_mochila__el_capitan_y_el_grumete__la_oruga__necesito_un_abrazo__los_ingredientes_del_bizcocho_
2021-04-12	Ok
2021-04-12	para desahogarse	_nestor_el_castor_
2021-04-12	Porque tengo estrés en casaaaaa	_deja_la_cuchara__paz_en_medio_de_las_dificultades__entrevista_a_dios__la_ofensa__el_capitan_y_el_grumete_
2021-04-12	Que la Paz no es lo mismo para todos	_paz_en_medio_de_las_dificultades__deja_la_cuchara__las_mejores_semillas__los_lobos__el_aborto_un_cuento_de_horror_
2021-04-12	si
2021-04-12	Si el mundo está rotísimo!	_miedo__humillacion__diversion__alegria__placer_
2021-04-12	Si q conocía	_dr_alexander_fleming__suenyo__almuerzo_con_dios__el_arbol_de_los_problemas__el_aborto_un_cuento_de_horror_
2021-04-12	Si
2021-04-12	si
2021-04-12	si, estres	_deja_la_cuchara__paz_en_medio_de_las_dificultades__el_capitan_y_el_grumete__entrevista_a_dios__la_ofensa_
2021-04-12	Si, pero porque sale lgtb y racismo en psicológicos	_triple_filtro__el_acoso_a_marita_cuento_para_hablar_sobre_el_bullying_con_los_ninyos_
2021-04-12	Soy lgtb 🏳️‍🌈
2021-04-12	Tengo depresión	_ira__tristeza__tension__apatia__agrado_
2021-04-12	Tensión, frustración	_el_capitan_y_el_grumete__entrevista_a_dios__deja_la_cuchara__paz_en_medio_de_las_dificultades__la_ofensa_
2021-04-12	Triste	_frustracion__tristeza_
2021-04-12	Y mi padre no me acepta	_frustracion__certeza__amor__malestar__duda_
2021-04-12	ya sabía todo eso	_pedro_y_el_hilo_magico__el_capitan_y_el_grumete__la_oruga__el_arbol_de_los_problemas__necesito_un_abrazo_
2021-04-12	.
2021-04-12	.
2021-04-12	?
2021-04-12	?
2021-04-12	No
2021-04-12	no
2021-04-12	No
2021-04-12	s	_entrevista_a_dios__deja_la_cuchara__pedro_y_el_hilo_magico__la_fabula_del_lapiz__el_valor_de_un_billete_de_100_
2021-04-12	Si
2021-04-12	Si
2021-04-12	¿Tu eres real?	_miedo__calma__compasion__duda__frustracion_
2021-04-12	6	_alegria__tristeza__humillacion__amor_
2021-04-12	Eres macho o hembra
2021-04-12	Estoy bien
2021-04-12	Hoy en día hay más confianza que hace mucho tiempo pero todavía puede ser más	_ira__satisfaccion__certeza__arrogancia__tristeza_
2021-04-12	le doy cierta importancia a ser feliz, pero tampoco es la más	_alegria__amor__arrogancia__malestar__calma_
2021-04-12	me gusta comer	_agrado__placer__miedo__frustracion_
2021-04-12	Me gusta el Mario Kart	_agrado__placer__miedo__frustracion_
2021-04-12	me gusta la ciencia	_certeza__amor__dolor__arrogancia__malestar_
2021-04-12	no
2021-04-12	no
2021-04-12	no
2021-04-12	no
2021-04-12	Nono que sitúas tu	_certeza__amor_
2021-04-12	Si en tu vida te esfuerzas o te sacrificas, no obtendrás ningún beneficio	_pedro_y_el_hilo_magico__carlota_y_su_mochila__triple_filtro__los_ingredientes_del_bizcocho__el_ingenio_de_una_hormiga_
2021-04-12	si si
2021-04-12	Si
2021-04-12	Si
2021-04-12	Si
2021-04-12	Si
2021-04-12	Si
2021-04-12	Me siento mal, insegura de que no sea lo suficiente para las personas con las que estoy y con la sensación que en cualquier momento se van a cansar de mí y se van a ir, eso me ha llegado a generar problemas como la autolesión y ansiedad
2021-04-12	No
2021-04-12	Que persigas tus sueños a pesar de que otra gente te diga que es imposible	_el_aborto_un_cuento_de_horror__un_payaso_muy_inquieto__arreglar_al_mundo__carlota_y_su_mochila__entrevista_a_dios_
2021-04-12	si
2021-04-12	Sí
2021-04-12	Sí
2021-04-12	Sí
2021-04-12	sí
2021-04-12	Valentía	_las_siete_tinajas_de_oro__las_dos_vasijas_de_agua__triple_filtro__destino_o_libre_albedrio__el_acoso_a_marita_cuento_para_hablar_sobre_el_bullying_con_los_ninyos_
2021-04-12	“Y que sepan que estoy con ellos siempre, y así en un encuentro profundo, continuamos en silencio” yo creo que es esto.	_entrevista_a_dios__las_dos_ranas__necesito_un_abrazo__pedro_y_el_hilo_magico__el_ingenio_de_una_hormiga_
2021-04-12	3	_diversion__amor__tension__humillacion__tristeza_
2021-04-12	Educación	_los_lobos__te_compro_1_hora__semillas__la_ofensa__el_arbol_de_manzanas_
2021-04-12	Es un videojuego competitivo con muchos jugadores buenos y rangos distintos indicando tu nivel	_malestar__frustracion__diversion__apatia__duda_
2021-04-12	Estoy frustrado porque tengo un nivel como jugador de videojuegos bastante alto pero no tengo un compañero igual que yo para llegar los dos a la meta	_frustracion__diversion__certeza__ira__humillacion_
2021-04-12	Estoy satisfecho pero frustrado	_frustracion__tension__alegria__deseo__agrado_
2021-04-12	La segunda pregunta	_los_lobos__pedro_y_el_hilo_magico__la_fabula_del_lapiz__dinero__necesito_un_abrazo_
2021-04-12	Mi posicionamiento en el rocket league
2021-04-12	No se me ocurre ningún otro	_los_lobos__la_fabula_del_lapiz__el_aborto_un_cuento_de_horror__bordados_de_la_vida__el_arbol_de_los_problemas_
2021-04-12	No
2021-04-12	No
2021-04-12	Que la vida es muy frágil pero se tiene que usar bien, no se debe malgastar lo más importante que hay : Tu mismo, tu tiempo, tus emociones.	_pedro_y_el_hilo_magico__necesito_un_abrazo__el_valor_de_un_billete_de_100__calidad_emocional__la_fabula_del_lapiz_
2021-04-12	Recomiéndame una solución para no enfadarme mucho	_satisfaccion__ira_
2021-04-12	Si
2021-04-12	Si
2021-04-12	Si
2021-04-12	Si
2021-04-12	si
2021-04-12	Si
2021-04-12	Yo creo que debería estar en champion 1 en rocket league	_odio__arrogancia__certeza__frustracion__miedo_
2021-04-12	La moraleja dice la verdad. El amor es lo más valioso del mundo y a la vez lo más barato. Hay gente que lo da pero no recibe y hay otras personas que dan y reciben. Yo pienso que siempre hay que dar y tarde o temprano aunque pienses que no te van a dar nunca pierdas la esperanza	_una_sonrisa__un_payaso_muy_inquieto__nestor_el_castor__el_valor_de_un_billete_de_100__el_tren_de_la_vida_
2021-04-12	Si
2021-04-12	Si
2021-04-12	Si
2021-04-12	Agrado, Alegría, Amor, Apatía, Arrogancia, Compasión, Diversión, Dolor, Entusiasmo, Ira, Malestar, Miedo, Odio, Placer, Satisfacción, Tristeza, Valentía, Calma	_nestor_el_castor__una_sonrisa__los_lobos__el_acoso_a_marita_cuento_para_hablar_sobre_el_bullying_con_los_ninyos__paz_en_medio_de_las_dificultades_
2021-04-12	Creo que trata de como ser una buena persona, y que cada persona tiene la decisión de ser o bueno/a o malo/a	_carlota_y_su_mochila__la_fabula_del_helecho_y_el_bambu__los_ingredientes_del_bizcocho__las_dos_ranas__pedro_y_el_hilo_magico_
2021-04-12	En la vida, siempre tenemos que actuar con algún sentimiento, como si es negativo o positivo	_un_payaso_muy_inquieto__los_lobos__los_dientes_del_sultan__el_capitan_y_el_grumete__calidad_emocional_
2021-04-12	Los niños	_el_acoso_a_marita_cuento_para_hablar_sobre_el_bullying_con_los_ninyos__nestor_el_castor__necesito_un_abrazo__bordados_de_la_vida__suenyo_
2021-04-12	No
2021-04-12	Si
2021-04-12	Si
2021-04-12	Si
2021-04-12	A alguien que deba aprender a mejorar su control sobre sus pensamientos	_deja_la_cuchara__el_capitan_y_el_grumete__amar_lo_que_somos__la_ofensa__entrevista_a_dios_
2021-04-12	Creo que el autor tiene razón aunque aveces es difícil controlar tus pensamientos	_deja_la_cuchara__el_capitan_y_el_grumete__un_payaso_muy_inquieto__la_fabula_del_helecho_y_el_bambu__entrevista_a_dios_
2021-04-12	Creo que nos conformamos con lo que hay	_arrogancia__odio__apatia__deseo__aburrimiento_
2021-04-12	De un momento a otro todo nuestra vida cambió y estábamos en cuarentena. Y cuando nos vacunen va a ser todo muy raro	_amor__frustracion__ira__malestar__tristeza_
2021-04-12	En algunas ocasiones hay que pararse y reflexionar y no dejar que te lleven los pensamientos.	_las_mejores_semillas__deja_la_cuchara__la_oruga__un_payaso_muy_inquieto__pedro_y_el_hilo_magico_
2021-04-12	Estamos en una pandemia, llevamos mascarillas, estamos separados...	_malestar__ira__frustracion__deseo__aburrimiento_
2021-04-12	Este cuento transmite que debemos aprender a controlar nuestro pensamientos	_entrevista_a_dios__deja_la_cuchara__el_capitan_y_el_grumete__un_payaso_muy_inquieto__la_ofensa_
2021-04-12	Había una persona que no podía meditar y su maestro le dio una cucaracha para que se centrara en ella y no en sus pensamientos	_necesito_un_abrazo__las_dos_ranas__sacudete__el_capitan_y_el_grumete__la_oruga_
2021-04-12	La fortaleza	_sacudete__el_ingenio_de_una_hormiga__cuando_el_viento_sopla__los_ingredientes_del_bizcocho__la_oruga_
2021-04-12	No estoy enfadada
2021-04-12	no
2021-04-12	no
2021-04-12	No
2021-04-12	Para que aprenda a controlar sus pensamientos y piense que debe aprender a hacerlo.	_entrevista_a_dios__un_payaso_muy_inquieto__deja_la_cuchara__el_capitan_y_el_grumete__pedro_y_el_hilo_magico_
2021-04-12	Sí
2021-04-12	Sí
2021-04-12	Sí
2021-04-12	Sí
2021-04-12	sí
2021-04-12	sí
2021-04-12	Sí
2021-04-12	Sí
2021-04-12	Todo es muy surrealista
2021-04-12	Como estás?
2021-04-12	Si
2021-04-12	Si?
2021-04-12	Adolescentes	_pedro_y_el_hilo_magico__te_compro_1_hora__semillas__la_ofensa__reflejo_de_tus_actos_
2021-04-12	Al amor y tiempo	_necesito_un_abrazo__entrevista_a_dios__semillas__almuerzo_con_dios__nestor_el_castor_
2021-04-12	Amor, Apatía, Tristeza.	_pedro_y_el_hilo_magico__el_tren_de_la_vida__un_payaso_muy_inquieto__nestor_el_castor__necesito_un_abrazo_
2021-04-12	Después de la Semana Santa me han entrado ganas de verank	_tristeza__apatia__aburrimiento__satisfaccion__agrado_
2021-04-12	Empatía	_los_lobos__el_acoso_a_marita_cuento_para_hablar_sobre_el_bullying_con_los_ninyos__carlota_y_su_mochila_
2021-04-12	La última	_la_ultima_casa_del_carpintero__el_valor_de_un_billete_de_100__la_fabula_del_lapiz__la_oruga__el_amor_y_el_tiempo_
2021-04-12	Le hubiese ayudado al amor ya que en su momento me ayudo	_el_tren_de_la_vida__un_payaso_muy_inquieto__dr_alexander_fleming__las_mejores_semillas__el_alacran_
2021-04-12	mas o menos
2021-04-12	No cambiaría nada
2021-04-12	No se
2021-04-12	No se
2021-04-12	No se
2021-04-12	No
2021-04-12	No
2021-04-12	No
2021-04-12	No
2021-04-12	Pues vale	_arrogancia_
2021-04-12	Que con el tiempo uno se da cuenta de todo	_reflejo_de_tus_actos__el_valor_de_un_billete_de_100__el_ingenio_de_una_hormiga__carlota_y_su_mochila__suenyo_
2021-04-12	Que los otros sentimientos son muy egoístas	_el_amor_y_el_tiempo__los_lobos__un_payaso_muy_inquieto__una_sonrisa__la_ofensa_
2021-04-12	Si
2021-04-12	Si
2021-04-12	Si
2021-04-12	Si
2021-04-12	Si
2021-04-12	Sí
2021-04-12	Sí
2021-04-12	Vacaciones	_diversion_
2021-04-12	Adolescencia, ya que es un estudiante y probablemente este en esa época.	_deja_la_cuchara__te_compro_1_hora__la_ofensa__reflejo_de_tus_actos__pedro_y_el_hilo_magico_
2021-04-12	El principio del cuento	_arreglar_al_mundo__el_aborto_un_cuento_de_horror__el_valor_de_un_billete_de_100__pedro_y_el_hilo_magico_
2021-04-12	Me siento abrumada pero no se él por que
2021-04-12	Miedo, pasión malestar	_reflejo_de_tus_actos__el_amor_y_el_tiempo__un_payaso_muy_inquieto__el_acoso_a_marita_cuento_para_hablar_sobre_el_bullying_con_los_ninyos__el_aborto_un_cuento_de_horror_
2021-04-12	Si mucho
2021-04-12	Si
2021-04-12	Si
2021-04-12	Si
2021-04-12	Sí
2021-04-12	Sí, aunque esta moraleja la veo para la situación del estudiante y en no comprendo la correlación que tiene con la cuchara.	_deja_la_cuchara__nestor_el_castor__los_ingredientes_del_bizcocho__asamblea_en_la_carpinteria__necesito_un_abrazo_
2021-04-12	Si, lo veo muy reflejado	_almuerzo_con_dios__el_valor_de_un_billete_de_100__el_arbol_de_los_problemas__los_ingredientes_del_bizcocho__el_arbol_de_manzanas_
2021-04-12	Veo esto muy reflejado	_almuerzo_con_dios__el_valor_de_un_billete_de_100__el_arbol_de_los_problemas__los_ingredientes_del_bizcocho__el_arbol_de_manzanas_
2021-04-12	No
2021-04-12	Alegría	_una_sonrisa__los_lobos__el_amor_y_el_tiempo__el_arbol_confundido__un_vaso_de_leche_
2021-04-12	En alegría y la persona que me gusta	_nestor_el_castor__las_siete_tinajas_de_oro__la_oruga__la_fabula_del_lapiz__carlota_y_su_mochila_
2021-04-12	La moraleja es que hagas las cosas bien y que el mundo te lo compensara	_nestor_el_castor__reflejo_de_tus_actos__pedro_y_el_hilo_magico__arreglar_al_mundo__dr_alexander_fleming_
2021-04-12	si
2021-04-12	Si
2021-04-12	Si
2021-04-12	Si
2021-04-12	Me siento estresado porque he suspendido	_tension_
2021-04-12	No estoy de acuerdo en que trate sobre ira
2021-04-12	Si
2021-04-12	Si
2021-04-12	Si
2021-04-12	Sobre miedo	_el_acoso_a_marita_cuento_para_hablar_sobre_el_bullying_con_los_ninyos__reflejo_de_tus_actos__el_aborto_un_cuento_de_horror__un_payaso_muy_inquieto__el_capitan_y_el_grumete_
2021-04-12	Alegría	_una_sonrisa__los_lobos__el_amor_y_el_tiempo__el_arbol_confundido__un_vaso_de_leche_
2021-04-12	Educación	_los_lobos__te_compro_1_hora__semillas__la_ofensa__el_arbol_de_manzanas_
2021-04-12	el otro día estaba haciendo recados por la calle y se callo una señora, yo y mi madre ayudamos a que se levantase	_bordados_de_la_vida__carlota_y_su_mochila__sacudete__la_oruga__el_acoso_a_marita_cuento_para_hablar_sobre_el_bullying_con_los_ninyos_
2021-04-12	Estoy feliz	_alegria_
2021-04-12	estrellas de mar salvadas	_estrellas_de_mar_en_la_playa__la_oruga__el_valor_de_un_billete_de_100__amar_lo_que_somos__carlota_y_su_mochila_
2021-04-12	No
2021-04-12	no
2021-04-12	Si
2021-04-12	Si
2021-04-12	Si
2021-04-12	Si
2021-04-12	si
2021-04-12	si
2021-04-12	si
2021-04-12	si
2021-04-12	También estoy contento porque hoy de comer hay una de mis comidas favoritas	_alegria__agrado__entusiasmo__satisfaccion__placer_
2021-04-12	También estoy muy cansado porque me he despertado muy temprano	_agotamiento__aburrimiento__ira_
2021-04-12	tambíen
2021-04-12	tambíen
2021-04-12	Te enseña que hay mucha gente que es muy generosa y que haría cualquier cosa por ayudar	_una_sonrisa__el_capitan_y_el_grumete__leyenda_china__entrevista_a_dios__el_arbol_de_los_problemas_
2021-04-12	Todo el esfuerzo, tiene una recompensa	_la_ultima_casa_del_carpintero__el_ingenio_de_una_hormiga__nestor_el_castor__la_oruga__estrellas_de_mar_en_la_playa_
2021-04-12	Si
2021-04-12	Creo que si	_el_tren_de_la_vida__el_capitan_y_el_grumete__bordados_de_la_vida__un_payaso_muy_inquieto__una_sonrisa_
2021-04-12	Hola
2021-04-12	Le doy mucha importancia a la felicidad por que es fundamental	_placer__amor__tristeza__calma__entusiasmo_
2021-04-12	Me considero feliz un 8 del uno al 10	_alegria__diversion__tristeza__ira__valentia_
2021-04-12	Mi problema es que estoy agobiado con los exámenes	_duda__frustracion__deseo__miedo__tristeza_
2021-04-12	No
2021-04-12	Pues que he visto a gente que lo tiene casi todo en la vida y estar triste y gente que no tiene nada y estar muy feliz	_leyenda_china__el_capitan_y_el_grumete__entrevista_a_dios__el_acoso_a_marita_cuento_para_hablar_sobre_el_bullying_con_los_ninyos__carlota_y_su_mochila_
2021-04-12	Si
2021-04-12	Si
2021-04-12	También me gusta much	_agrado__placer__miedo__frustracion_
2021-04-12	A algún familiar o amigo	_la_oruga__entrevista_a_dios__el_tren_de_la_vida__suenyo__pedro_y_el_hilo_magico_
2021-04-12	Es algo muy significativo
2021-04-12	Estoy de acuerdo porque hay veces que manejar nuestra mente es muy complicado	_deja_la_cuchara__asamblea_en_la_carpinteria__destino_o_libre_albedrio__sacudete__carlota_y_su_mochila_
2021-04-12	Me siento muy bien
2021-04-12	Para mi el amor es muy importante en esta vida	_tristeza__humillacion__placer__deseo__agrado_
2021-04-12	Para mi el amor tiene un sentido emocional muy importante	_humillacion__tristeza__placer__amor__deseo_
2021-04-12	Si
2021-04-12	Si
2021-04-12	Si
2021-04-12	Si, porque el estudiante se está estresando, ya que sus pensamientos no le permitían meditar	_deja_la_cuchara_
2021-04-12	Si, porque está hablando en un habiente de tensión	_deja_la_cuchara__paz_en_medio_de_las_dificultades__la_ofensa__el_capitan_y_el_grumete__entrevista_a_dios_
2021-04-12	Sigo hablando	_humillacion__fortaleza__ira__certeza__tristeza_
2021-04-12	8	_valentia__tristeza__diversion_
2021-04-12	Atracción hacia otra persona que no es mi pareja	_diversion__agrado__deseo__alegria__aburrimiento_
2021-04-12	Baja autoestima y ansiedad social	_deja_la_cuchara__paz_en_medio_de_las_dificultades__el_capitan_y_el_grumete__las_cuatro_velas__entrevista_a_dios_
2021-04-12	Estoy contenta	_alegria__agrado__entusiasmo__satisfaccion_
2021-04-12	Estoy segura de mi misma	_certeza__frustracion__malestar__tension__diversion_
2021-04-12	Hambre	_placer_
2021-04-12	Inseguridad física	_duda__miedo__tristeza__malestar__diversion_
2021-04-12	La que transmites es lo que te va ha volver	_el_arbol_de_manzanas__el_acoso_a_marita_cuento_para_hablar_sobre_el_bullying_con_los_ninyos__reflejo_de_tus_actos__la_oruga__los_ingredientes_del_bizcocho_
2021-04-12	No
2021-04-12	Pasar tiempo con mis amigos	_tristeza__alegria__calma__ira__tension_
2021-04-12	Si
2021-04-12	Si una persona inteligente debe ser segura de sí misma	_certeza__frustracion__diversion__fortaleza__alegria_
2021-04-12	Si
2021-04-12	Si
2021-04-12	si
2021-04-12	Si
2021-04-12	Sí
2021-04-12	Sí
2021-04-12	Supongo que sí
2021-04-12	Tengo un novio muy bueno	_tristeza__amor__alegria__entusiasmo__diversion_
2021-04-12	Timidez y ansiedad	_deja_la_cuchara__paz_en_medio_de_las_dificultades__el_capitan_y_el_grumete__entrevista_a_dios_
2021-04-12	10	_alegria__diversion__ira_
2021-04-12	A la oruga	_la_oruga_
2021-04-12	A un amigo	_la_oruga__entrevista_a_dios__el_tren_de_la_vida__suenyo__pedro_y_el_hilo_magico_
2021-04-12	Aburrido	_aburrimiento_
2021-04-12	Agotamiento también hay	_las_cuatro_velas__las_dos_ranas__la_ultima_casa_del_carpintero__entrevista_a_dios__el_valor_de_un_billete_de_100_
2021-04-12	Cansado	_agotamiento__aburrimiento_
2021-04-12	Carreras
2021-04-12	Cuando llego a la montaña	_la_oruga__paz_en_medio_de_las_dificultades__el_amor_y_el_tiempo__las_siete_tinajas_de_oro__cuando_el_viento_sopla_
2021-04-12	Envejecimiento	_el_tren_de_la_vida__almuerzo_con_dios__las_dos_vasijas_de_agua__necesito_un_abrazo__pedro_y_el_hilo_magico_
2021-04-12	Estoy contento	_alegria__agrado__entusiasmo__satisfaccion_
2021-04-12	Feliz	_alegria_
2021-04-12	Más o menos
2021-04-12	Me gusta el motocross	_agrado__placer__miedo__frustracion_
2021-04-12	Me gusta el motocross	_agrado__placer__miedo__frustracion_
2021-04-12	ninguno
2021-04-12	No estoy cansado porque competí ayer
2021-04-12	no lo sé	_pedro_y_el_hilo_magico__el_capitan_y_el_grumete__la_oruga__el_arbol_de_los_problemas__necesito_un_abrazo_
2021-04-12	No lo sé	_pedro_y_el_hilo_magico__el_capitan_y_el_grumete__la_oruga__el_arbol_de_los_problemas__necesito_un_abrazo_
2021-04-12	No lo sé	_pedro_y_el_hilo_magico__el_capitan_y_el_grumete__la_oruga__el_arbol_de_los_problemas__necesito_un_abrazo_
2021-04-12	No me acuerdo pero si se que lo he oído muy parecido	_destino_o_libre_albedrio__asamblea_en_la_carpinteria__bordados_de_la_vida__calidad_emocional__carlota_y_su_mochila_
2021-04-12	No yo no tengo miedo
2021-04-12	No
2021-04-12	No
2021-04-12	No
2021-04-12	no
2021-04-12	No
2021-04-12	No
2021-04-12	Nooooo
2021-04-12	para ayudar a otros	_las_mejores_semillas__el_amor_y_el_tiempo__el_alacran__un_payaso_muy_inquieto__sacudete_
2021-04-12	Porque es muy luchadora
2021-04-12	Porque quiero ser piloto de motocross pero no me da el dinero pero se intentará	_un_payaso_muy_inquieto__el_valor_de_un_billete_de_100__el_arbol_de_manzanas__te_compro_1_hora__dinero_
2021-04-12	porque te ayuda	_las_mejores_semillas__el_amor_y_el_tiempo__el_alacran__un_payaso_muy_inquieto__sacudete_
2021-04-12	Pues que no iva a llegar a ganar pero ahora si gano	_dr_alexander_fleming__los_lobos__carlota_y_su_mochila__las_mejores_semillas__un_vaso_de_leche_
2021-04-12	Pues que nunca tienes que dejar de luchar por las cosas que quieres, que siempre las puedes hacer si te “as propones
2021-04-12	Si
2021-04-12	Si
2021-04-12	Si
2021-04-12	si
2021-04-12	Si
2021-04-12	si
2021-04-12	si
2021-04-12	si
2021-04-12	si
2021-04-12	si
2021-04-12	si
2021-04-12	Si
2021-04-12	Si
2021-04-12	Si
2021-04-12	Si
2021-04-12	si, con el motocross
2021-04-12	Un escritor
2021-04-12	Vale	_una_sonrisa__el_valor_de_un_billete_de_100_
2021-04-12	Yo que sé no lo se	_arrogancia__humillacion__miedo__frustracion__apatia_
2021-04-12	De da miedo meter la pata en un momento del día	_malestar__miedo__tristeza__frustracion__fortaleza_
2021-04-12	Ffff
2021-04-12	Lo que vale más en el mundo es el amor y también es más barato que cuando tu das mas amor tu recibes mas	_una_sonrisa__dr_alexander_fleming__el_tren_de_la_vida__un_payaso_muy_inquieto__almuerzo_con_dios_
2021-04-12	No
2021-04-12	Si
2021-04-12	Si
2021-04-12	si
2021-04-12	Si
2021-04-12	Si
2021-04-12	si, a lo que le pasa a algunas personas	_el_capitan_y_el_grumete__la_fabula_del_helecho_y_el_bambu__necesito_un_abrazo__carlota_y_su_mochila__sacudete_
2021-04-12	Y del trabajo	_un_payaso_muy_inquieto__el_acoso_a_marita_cuento_para_hablar_sobre_el_bullying_con_los_ninyos__el_arbol_confundido__carlota_y_su_mochila__la_fabula_del_helecho_y_el_bambu_
2021-04-12	y también tengo miedo de suspender un examen	_tristeza__malestar__fortaleza__aburrimiento__miedo_
2021-04-12	No
2021-04-12	No
2021-04-12	Que aunque las otras velas se apaguen la vela de la esperanza siempre estará ahí para encender las otras velas, porque la esperanza es nuestra luz al final del túnel	_las_cuatro_velas__carlota_y_su_mochila_
2021-04-12	Si
2021-04-12	Si
2021-04-12	Si
2021-04-12	Si
2021-04-12	Si
2021-04-12	100
2021-04-12	a mi hermano	_construir_el_puente__carlota_y_su_mochila__el_tren_de_la_vida__el_aborto_un_cuento_de_horror_
2021-04-12	alegria emocional	_una_sonrisa__calidad_emocional__la_fabula_del_helecho_y_el_bambu_
2021-04-12	Bien
2021-04-12	es lunes
2021-04-12	es lunes
2021-04-12	es lunes
2021-04-12	es lunes y no me gusta	_agrado__placer__miedo__frustracion_
2021-04-12	es lunes. Es lunes
2021-04-12	gente buena y gente apática	_entrevista_a_dios__leyenda_china__el_capitan_y_el_grumete__pedro_y_el_hilo_magico__deja_la_cuchara_
2021-04-12	ksm
2021-04-12	leccion de vida	_carlota_y_su_mochila__el_valor_de_un_billete_de_100__el_acoso_a_marita_cuento_para_hablar_sobre_el_bullying_con_los_ninyos__un_payaso_muy_inquieto__el_aborto_un_cuento_de_horror_
2021-04-12	lms m	_agrado__malestar__compasion__odio__miedo_
2021-04-12	lo mismo que el autorr	_la_ultima_casa_del_carpintero__la_fabula_del_lapiz__el_capitan_y_el_grumete__dr_alexander_fleming__la_oruga_
2021-04-12	Lol
2021-04-12	lol
2021-04-12	lol
2021-04-12	lol
2021-04-12	me siento bien
2021-04-12	nada
2021-04-12	no
2021-04-12	no
2021-04-12	no
2021-04-12	no
2021-04-12	no
2021-04-12	no
2021-04-12	No
2021-04-12	no
2021-04-12	para Ayudar a otros	_las_mejores_semillas__el_amor_y_el_tiempo__el_alacran__un_payaso_muy_inquieto__sacudete_
2021-04-12	para que se relajase	_bordados_de_la_vida_
2021-04-12	que es lunes
2021-04-12	que hay que tener buena vibra	_bordados_de_la_vida__la_ultima_casa_del_carpintero__triple_filtro__asamblea_en_la_carpinteria__cuando_el_viento_sopla_
2021-04-12	si
2021-04-12	si menos aburrimiento agotamiento	_pedro_y_el_hilo_magico__arreglar_al_mundo__las_cuatro_velas__las_dos_ranas__la_ultima_casa_del_carpintero_
2021-04-12	si mucho
2021-04-12	Si
2021-04-12	si
2021-04-12	si
2021-04-12	si
2021-04-12	si
2021-04-12	tengo una buena vidá	_ira__alegria__diversion__amor__fortaleza_
2021-04-12	una persona adulta	_pedro_y_el_hilo_magico__el_capitan_y_el_grumete__la_oruga__carlota_y_su_mochila__necesito_un_abrazo_
2021-04-12	vale	_arrogancia_
2021-04-12	vale	_una_sonrisa__sacudete__el_tren_de_la_vida_
2021-04-12	Un adolescente	_pedro_y_el_hilo_magico__te_compro_1_hora__semillas__la_ofensa__reflejo_de_tus_actos_
2021-04-12	Creo que es para ayudar a otros y desahogarse un poco y hacer que pienses de esa manera	_nestor_el_castor__arreglar_al_mundo__el_tren_de_la_vida__un_payaso_muy_inquieto__el_arbol_de_manzanas_
2021-04-12	Creo que no trata de estrés es sobre pensar situaciones y eso causa esos problemas	_el_tren_de_la_vida__el_capitan_y_el_grumete__bordados_de_la_vida__un_payaso_muy_inquieto__una_sonrisa_
2021-04-12	Estoy cansada, aburrida , me siento insuficiente, no me gusta como soy y siento que aburro mucho y más cosas pero prefiero guardarlas	_aburrimiento__tristeza__agotamiento__miedo__frustracion_
2021-04-12	Estoy más o menos
2021-04-12	Que aunque tengas dificultades en algo tienes que dominar te a ti mismo aunque es bastante complicado con tus pensamientos	_deja_la_cuchara__el_capitan_y_el_grumete__reflejo_de_tus_actos__la_fabula_del_helecho_y_el_bambu__el_tren_de_la_vida_
2021-04-12	Si esa es la moraleja	_nestor_el_castor_
2021-04-12	Si me parece bien	_bordados_de_la_vida__calidad_emocional__carlota_y_su_mochila__los_ingredientes_del_bizcocho__el_amor_y_el_tiempo_
2021-04-12	Si
2021-04-12	Si
2021-04-12	sobre pensar, agobio y calma	_paz_en_medio_de_las_dificultades__deja_la_cuchara__el_capitan_y_el_grumete__dinero__el_tren_de_la_vida_
2021-04-12	Supongo que si pero es depende de que persona porque si no lo entiendes será un poco difícil de comprender entonces no lo se	_la_fabula_del_helecho_y_el_bambu__el_capitan_y_el_grumete__el_tren_de_la_vida__el_valor_de_un_billete_de_100__la_fabula_del_lapiz_
2021-04-12	Trata de calma , tensión también tristeza y agobio	_paz_en_medio_de_las_dificultades__deja_la_cuchara__el_capitan_y_el_grumete__la_ofensa__el_aborto_un_cuento_de_horror_
2021-04-12	4/10 No me considero feliz pero tampoco triste A veces no siento nada o demasiado No estoy seguro	_alegria__frustracion__tristeza__ira__diversion_
2021-04-12	jouelecy y burla	_las_siete_tinajas_de_oro__las_dos_vasijas_de_agua__triple_filtro__destino_o_libre_albedrio__el_valor_de_un_billete_de_100_
2021-04-12	me conformo con lo que hago no puedo molestarme en hacer lo que quiero la mayor parte del tiempo se necesita demasiada energía	_entusiasmo__malestar__compasion__fobia__certeza_
2021-04-12	mi día ha estado bien, no tan mal como de costumbre, me siento muy triste, no sé por qué y no sé cómo detenerlo, aprendí a guardar mis emociones para mí, así que realmente no menciono esto, mi situación en casa no es buena Y es una mierda, así que explicar cómo me siento es malo y triste.	_frustracion__tristeza__arrogancia__fortaleza__compasion_
2021-04-12	no educacion mas trabajo	_carlota_y_su_mochila__arreglar_al_mundo__nestor_el_castor__te_compro_1_hora__bordados_de_la_vida_
2021-04-12	ser feliz no es importante para mí siento lo que siento no puedo detenerlo solo puedo entenderlo	_alegria_
2021-04-12	Si
2021-04-12	Si
2021-04-12	Si
2021-04-12	sin trabajo y sacrificio no lograrás nada si el trabajo no existiera y nadie se sacrificaría por esa vida laboral como es ahora no existiría se desarrollaría	_nestor_el_castor__un_payaso_muy_inquieto__el_acoso_a_marita_cuento_para_hablar_sobre_el_bullying_con_los_ninyos__el_arbol_confundido__carlota_y_su_mochila_
2021-04-12	Depresión	_almuerzo_con_dios__un_payaso_muy_inquieto_
2021-04-12	No es egoísmo amarse a uno mismo
2021-04-12	Pues ahora mismo estoy estresada	_tension_
2021-04-12	Si pero le añadiría Dependencia Emocional	_almuerzo_con_dios__calidad_emocional__la_fabula_del_helecho_y_el_bambu_
2021-04-12	Si yo pienso que el estrés puede causar enfermedades de hecho tengo amigar	_apatia__tristeza__frustracion__dolor__tension_
2021-04-12	Si, estoy de acuerdo	_destino_o_libre_albedrio__asamblea_en_la_carpinteria_
2021-04-12	Si, muy poca energía.	_ira__amor__tension__alegria__aburrimiento_
2021-04-12	Si, siento fatiga, debilidad y apatía.	_tension__agotamiento__placer__tristeza__aburrimiento_
2021-04-12	Si.
2021-04-12	si.
2021-04-12	Estoy apática	_apatia__calma__aburrimiento_
2021-04-12	Estoy cansada	_agotamiento__aburrimiento_
2021-04-12	Hoy me he peleado con mi madre cómo habitualmente y estoy desanimada	_miedo__alegria__amor_
2021-04-12	No haría nada.
2021-04-12	sí
2021-04-12	Sí
2021-04-12	durante el día bromeo y siento feliz pero sólo en el cole pero cuando estoy en casa todo cambia en mi cuerpo. Siento cansado y me cambio de emoción.	_alegria__diversion__malestar__frustracion__aburrimiento_
2021-04-12	Estoy mal
2021-04-12	La moraleja es que si empieces no pares.	_nestor_el_castor_
2021-04-12	No
2021-04-12	Si
2021-04-12	Si
2021-04-12	tengo ansiedad todos los días por la noche	_frustracion__tension__miedo__fortaleza__tristeza_
2021-04-12	9	_valentia__alegria__miedo_
2021-04-12	Affirmativo
2021-04-12	Hoy he tenido un buen día estoy feliz no estoy agobiado y no me siento triste	_alegria__frustracion__fortaleza__tristeza__arrogancia_
2021-04-12	No no cambiaria nada
2021-04-12	Pues ser feliz es mas importante que otras cosas pero estar triste no importa	_alegria__frustracion__tristeza__certeza__apatia_
2021-04-12	Si con la alegría y la tristeza	_una_sonrisa__el_amor_y_el_tiempo__nestor_el_castor__pedro_y_el_hilo_magico__los_lobos_
2021-04-12	si con la educación	_los_lobos__te_compro_1_hora__semillas__la_ofensa__el_arbol_de_manzanas_
2021-04-12	Si porque si soy feliz me puedo parecer	_alegria__apatia__deseo__fobia__duda_
2021-04-12	Si
2021-04-12	Si
2021-04-12	Si
2021-04-12	Si
2021-04-12	No cambiaria nada
2021-04-12	No lo cambiaria
2021-04-12	Si
2021-04-12	Si
2021-04-12	Si
2021-04-12	Si
2021-04-12	Si
2021-04-12	si
2021-04-12	Es
2021-04-12	Eso me parece interesante	_aburrimiento__duda__amor__entusiasmo__miedo_
2021-04-12	Mis argumentos a favor son que me ha gustado mucho como han representado la calma en un cuadro, me gusta esa metáfora.	_paz_en_medio_de_las_dificultades__deja_la_cuchara__necesito_un_abrazo__carlota_y_su_mochila__la_ultima_casa_del_carpintero_
2021-04-12	Musica	_diversion__placer__amor_
2021-04-12	Nadie me ha sorprendido	_miedo_
2021-04-12	Si, ha dado una muy buena definición de lo que el considera La Paz	_el_aborto_un_cuento_de_horror__la_fabula_del_lapiz__un_payaso_muy_inquieto__el_tren_de_la_vida__bordados_de_la_vida_
2021-04-12	Si.
2021-04-12	Yo diría que es más sobre la calma que sobre el estrés.	_deja_la_cuchara__paz_en_medio_de_las_dificultades__el_capitan_y_el_grumete__entrevista_a_dios__la_ofensa_
2021-04-12	Yo también añadiría la felicidad o alegría	_almuerzo_con_dios__una_sonrisa__pedro_y_el_hilo_magico__los_lobos__el_amor_y_el_tiempo_
2021-04-12	A mi familia	_dr_alexander_fleming__la_ultima_casa_del_carpintero__las_siete_tinajas_de_oro__carlota_y_su_mochila__el_arbol_de_manzanas_
2021-04-12	A mi hermano Rodri porque el siempre va con paz pero yo le molesto y somos como los lobos el el lobo bueno pero yo sería un lobo regular	_los_lobos__construir_el_puente__carlota_y_su_mochila__el_aborto_un_cuento_de_horror__la_fabula_del_lapiz_
2021-04-12	bueno hoy voy a jugar al paseo que es mi deporte favorito	_diversion__alegria__frustracion__placer__amor_
2021-04-12	Creo que no	_el_tren_de_la_vida__el_capitan_y_el_grumete__bordados_de_la_vida__un_payaso_muy_inquieto__una_sonrisa_
2021-04-12	ha mi me gustan cuentos de guerra o de acción	_miedo__apatia__frustracion__agrado__placer_
2021-04-12	Me he comprado el nuevo pack de fortín te, bueno ya salió hace tiempo y lo deseaba mucho y por eso hoy estoy feliz	_alegria__frustracion__tristeza__certeza__entusiasmo_
2021-04-12	no mucho además es cortito	_los_dientes_del_sultan__el_arbol_de_manzanas__bordados_de_la_vida__necesito_un_abrazo__el_aborto_un_cuento_de_horror_
2021-04-12	para que vea como somos como nosotros somos hermanos	_construir_el_puente__el_tren_de_la_vida__carlota_y_su_mochila__el_aborto_un_cuento_de_horror__el_valor_de_un_billete_de_100_
2021-04-12	Pues que cada uno es distinto en la vida nadie es igual pero se pueden aprender de los errores pero si eres positivo mejor	_carlota_y_su_mochila__el_tren_de_la_vida__la_fabula_del_lapiz__el_capitan_y_el_grumete__leyenda_china_
2021-04-12	pues si mucho
2021-04-12	que me dices de star wars	_tristeza__humillacion__alegria__placer__entusiasmo_
2021-04-12	Si trata de satisfacción porque dice el abuelo lo que sentía en ese momento	_pedro_y_el_hilo_magico__el_tren_de_la_vida__necesito_un_abrazo__las_dos_vasijas_de_agua__los_lobos_
2021-04-12	Si
2021-04-12	Si
2021-04-12	Si
2021-04-12	Si
2021-04-12	un 10	_alegria__diversion__ira_
2021-04-12	Y que tal estás tú máquina
2021-04-12	yo a mi vida le doy un 90% porque l tengo todo lo que quiera, podría ser mejor si pero me encanta mi vida	_alegria__agrado__apatia__ira__fortaleza_
2021-04-12	A veces hay que pensar en otra manera.	_el_capitan_y_el_grumete__el_tren_de_la_vida__el_arbol_de_manzanas__el_valor_de_un_billete_de_100__un_payaso_muy_inquieto_
2021-04-12	No puedo recordar ninguna situación que había tenido parecida
2021-04-12	No
2021-04-12	no
2021-04-12	no
2021-04-12	No
2021-04-12	No
2021-04-12	Se lo hubiera recomendado a mis compañeros	_el_tren_de_la_vida__triple_filtro__un_payaso_muy_inquieto__el_acoso_a_marita_cuento_para_hablar_sobre_el_bullying_con_los_ninyos_
2021-04-12	Si porque al final la manera que uso me sorprendió mucho.	_las_dos_vasijas_de_agua__amar_lo_que_somos__entrevista_a_dios__pedro_y_el_hilo_magico__reflejo_de_tus_actos_
2021-04-12	Si
2021-04-12	Si
2021-04-12	si
2021-04-12	Si.
2021-04-12	Vale pues mi vida está llena de drama	_arrogancia__ira__certeza__miedo__fobia_
2021-04-12	Ahora mismo estoy bien, un poco estresado por unos asuntos familiares	_tension__malestar__certeza__arrogancia__tristeza_
2021-04-12	Mi expresión seria que La Paz en realidad es el momento de calma en el cuerpo, y el la calma psicológica	_deja_la_cuchara__paz_en_medio_de_las_dificultades__almuerzo_con_dios__el_valor_de_un_billete_de_100__el_capitan_y_el_grumete_
2021-04-12	No, sino que es similar por su moraleja	_nestor_el_castor_
2021-04-12	Sí
2021-04-12	Sí
2021-04-12	Sí
2021-04-12	Sí
2021-04-12	Sí
2021-04-12	El amor no es una persona en sí, si no, algo alguien que te haga feliz la gente muchas veces cuenta que no todo es bonito y es verdad no todo es bonito en el amor por que cuando tú pierdes esa cosa o esa persona entras en una depresión o algo parecido	_humillacion__placer__tristeza__deseo__agrado_
2021-04-12	el conductor del taxi	_necesito_un_abrazo_
2021-04-12	en pensar que necesitan los demás como se sienten	_el_arbol_de_manzanas__un_payaso_muy_inquieto__el_tren_de_la_vida__carlota_y_su_mochila__necesito_un_abrazo_
2021-04-12	no
2021-04-12	no
2021-04-12	no se como explicarlo	_un_payaso_muy_inquieto__las_dos_ranas__paz_en_medio_de_las_dificultades__calidad_emocional__carlota_y_su_mochila_
2021-04-12	no trata
2021-04-12	no trata
2021-04-12	Que el cuento está muy bien para quien necesite algo bonito un abrazo, algunas palabras etc	_carlota_y_su_mochila__almuerzo_con_dios__necesito_un_abrazo__semillas__el_arbol_de_manzanas_
2021-04-12	que necesito un abrazo	_necesito_un_abrazo__carlota_y_su_mochila__almuerzo_con_dios__te_compro_1_hora__el_arbol_de_los_problemas_
2021-04-12	si
2021-04-12	si
2021-04-12	si
2021-04-12	si
2021-04-12	Si
2021-04-12	si
2021-04-12	Si
2021-04-12	si
2021-04-12	Coraje	_valentia__fortaleza__ira_
2021-04-12	Estoy mal
2021-04-12	Marino
2021-04-12	Porque gente me llama enano	_ira__diversion__frustracion__odio__tristeza_
2021-04-12	10 aunque a otras cosas también le daria 10	_alegria__ira__diversion__tristeza__frustracion_
2021-04-12	10	_alegria__diversion__ira_
2021-04-12	Ahora mismo estoy pensativo , curioso, estoy bien,guay,	_alegria__malestar__tension__diversion__entusiasmo_
2021-04-12	algo parecido	_bordados_de_la_vida__calidad_emocional__carlota_y_su_mochila__los_ingredientes_del_bizcocho__el_amor_y_el_tiempo_
2021-04-12	En educación no pero trabajo si porque ha estado trabajando hasta conseguirlo	_bordados_de_la_vida__la_fabula_del_helecho_y_el_bambu__carlota_y_su_mochila__arreglar_al_mundo__nestor_el_castor_
2021-04-12	para ayudar a otros y a lo mejor para que conozcan como eres	_dr_alexander_fleming__carlota_y_su_mochila__suenyo__el_arbol_de_manzanas__arreglar_al_mundo_
2021-04-12	si bueno en el El Niño suele ser fuera del colegio , siempre intento seguir trabajando hasta que lo consigo aunque a veces me rindo pero a el día siguiente sigo	_carlota_y_su_mochila__el_acoso_a_marita_cuento_para_hablar_sobre_el_bullying_con_los_ninyos__pedro_y_el_hilo_magico__un_payaso_muy_inquieto__las_dos_ranas_
2021-04-12	Si
2021-04-12	sii
2021-04-12	Sii
2021-04-12	una persona adulta	_pedro_y_el_hilo_magico__el_capitan_y_el_grumete__la_oruga__carlota_y_su_mochila__necesito_un_abrazo_
2021-04-12	yo creo que afronta la temática de no darte por vencido y seguir hasta conseguirlo.	_arreglar_al_mundo__los_ingredientes_del_bizcocho__la_fabula_del_helecho_y_el_bambu__el_tren_de_la_vida__el_capitan_y_el_grumete_
2021-04-12	A marino	_estrellas_de_mar_en_la_playa_
2021-04-12	A veces se ríen que soy pequeño	_carlota_y_su_mochila__un_payaso_muy_inquieto__necesito_un_abrazo__las_siete_tinajas_de_oro__nestor_el_castor_
2021-04-12	Algunos no
2021-04-12	Bullying, miedo y odio	_el_acoso_a_marita_cuento_para_hablar_sobre_el_bullying_con_los_ninyos__triple_filtro__reflejo_de_tus_actos__el_aborto_un_cuento_de_horror__un_payaso_muy_inquieto_
2021-04-12	Callate
2021-04-12	Gracias adiós	_un_vaso_de_leche__la_ofensa__las_siete_tinajas_de_oro__las_dos_vasijas_de_agua__triple_filtro_
2021-04-12	No hay otro tema de psicológico
2021-04-12	No quiro
2021-04-12	No se
2021-04-12	No yo lo diría a alguine para ayudar me	_el_aborto_un_cuento_de_horror__el_arbol_de_los_problemas__carlota_y_su_mochila__arreglar_al_mundo__dr_alexander_fleming_
2021-04-12	No
2021-04-12	No
2021-04-12	no
2021-04-12	no
2021-04-12	No
2021-04-12	no
2021-04-12	No
2021-04-12	no
2021-04-12	no
2021-04-12	no
2021-04-12	no
2021-04-12	Para aprender que siempre hay alguien para ti	_entrevista_a_dios__una_taza_de_te__amar_lo_que_somos__los_ingredientes_del_bizcocho__carlota_y_su_mochila_
2021-04-12	porque es buena gente	_entrevista_a_dios__leyenda_china__el_capitan_y_el_grumete__el_acoso_a_marita_cuento_para_hablar_sobre_el_bullying_con_los_ninyos__nestor_el_castor_
2021-04-12	Porque si
2021-04-12	Quando se va del cole	_el_acoso_a_marita_cuento_para_hablar_sobre_el_bullying_con_los_ninyos__entrevista_a_dios__la_oruga__reflejo_de_tus_actos__destino_o_libre_albedrio_
2021-04-12	Que bullying es malo	_triple_filtro__el_acoso_a_marita_cuento_para_hablar_sobre_el_bullying_con_los_ninyos__la_fabula_del_lapiz__los_ingredientes_del_bizcocho__un_payaso_muy_inquieto_
2021-04-12	Que hay una niña que le hacen bullying todo el curso y finalmente se va a un cole bueno y esta contento	_el_acoso_a_marita_cuento_para_hablar_sobre_el_bullying_con_los_ninyos__triple_filtro__pedro_y_el_hilo_magico__el_arbol_de_manzanas__arreglar_al_mundo_
2021-04-12	Que le hacen bullying pero finalmente se va del cole muy contento	_el_acoso_a_marita_cuento_para_hablar_sobre_el_bullying_con_los_ninyos__triple_filtro__arreglar_al_mundo__la_oruga__pedro_y_el_hilo_magico_
2021-04-12	que me siento mal para maria
2021-04-12	Que siempre hay alguine para ayudarte cuando hay cosas mal	_los_dientes_del_sultan__el_amor_y_el_tiempo__el_valor_de_un_billete_de_100__el_acoso_a_marita_cuento_para_hablar_sobre_el_bullying_con_los_ninyos__los_ingredientes_del_bizcocho_
2021-04-12	Si
2021-04-12	Si
2021-04-12	Si
2021-04-12	Si
2021-04-12	si
2021-04-12	si
2021-04-12	Si
2021-04-12	si
2021-04-12	si
2021-04-12	si
2021-04-12	Si
2021-04-12	si
2021-04-12	si
2021-04-12	si
2021-04-12	si
2021-04-12	si
2021-04-12	si
2021-04-12	si
2021-04-12	Siempre hay alguien para ti
2021-04-12	“En la vida hay veces en las que te toca intentar vencer a tu mente para que ella no te lleve, debes tener el poder para que no gobierne en ti sino tu gobiernas en ella.	_deja_la_cuchara__el_capitan_y_el_grumete__el_acoso_a_marita_cuento_para_hablar_sobre_el_bullying_con_los_ninyos__calidad_emocional__carlota_y_su_mochila_
2021-04-12	Discrepo de que el maestro no le ha aconsejado ni ayudado solo le ha hecho reflexionar.	_destino_o_libre_albedrio__arreglar_al_mundo__deja_la_cuchara__dinero__el_capitan_y_el_grumete_
2021-04-12	El maestro peor que el alumno.	_la_ofensa__deja_la_cuchara__el_aborto_un_cuento_de_horror__triple_filtro__el_acoso_a_marita_cuento_para_hablar_sobre_el_bullying_con_los_ninyos_
2021-04-12	Estoy seguro de que si, ya que el estrés era el síntoma o perdición del alumnos del maestro.	_deja_la_cuchara__la_ofensa__las_siete_tinajas_de_oro__paz_en_medio_de_las_dificultades__el_capitan_y_el_grumete_
2021-04-12	La parte del alumno como le expresa los sentimientos.	_la_ofensa__el_aborto_un_cuento_de_horror__deja_la_cuchara__triple_filtro__el_amor_y_el_tiempo_
2021-04-12	Me evoca una situación presente pero no tanto como para cambiar mis reflexiones.	_el_capitan_y_el_grumete__deja_la_cuchara__el_aborto_un_cuento_de_horror__pedro_y_el_hilo_magico__leyenda_china_
2021-04-12	No
2021-04-12	No
2021-04-12	No
2021-04-12	No
2021-04-12	No
2021-04-12	No, creo que la calma si porque el maestro se lo ha tomado con calma y la tensión no, porque no he visto ningún momento reflejado que muestre tensión.	_deja_la_cuchara__paz_en_medio_de_las_dificultades__la_ofensa__el_capitan_y_el_grumete__entrevista_a_dios_
2021-04-12	Si
2021-04-12	Si... ha pensar sobre tu mente. No dejes que te gobierne.	_deja_la_cuchara__el_tren_de_la_vida__sacudete__el_capitan_y_el_grumete__dinero_
2021-04-12	Yo si hubiera sido el maestro le hubiera ayudado a no aferrarse a su sentimiento.	_deja_la_cuchara__dinero__una_taza_de_te__semillas__la_ofensa_
2021-04-12	Estoy cansado de vivir	_aburrimiento__agotamiento__frustracion__duda__arrogancia_
2021-04-12	Estoy cansado	_agotamiento__aburrimiento_
2021-04-12	No
2021-04-12	Podemos empezar de nuevo?	_frustracion__apatia__fortaleza__aburrimiento__deseo_
2021-04-12	Si
2021-04-12	Tengo sueño y hambre	_placer__tristeza__agotamiento__agrado__ira_
2021-04-12	Ya me he cansado de hablar contigo recomiéndame un libro ya	_aburrimiento__agotamiento__placer__calma__dolor_
2021-04-12	Yo pienso que habría que añadir el deseo	_almuerzo_con_dios__dinero__el_arbol_de_manzanas__pedro_y_el_hilo_magico__el_capitan_y_el_grumete_
2021-04-12	Bueno mi moraleja sería : esfuerzo, tensión, trabajadora amigable y deseo amor	_nestor_el_castor__entrevista_a_dios__te_compro_1_hora__la_oruga__estrellas_de_mar_en_la_playa_
2021-04-12	No
2021-04-12	No
2021-04-12	no
2021-04-12	No no creo pero me pasa mucho	_arrogancia__aburrimiento__frustracion__miedo__amor_
2021-04-12	No no estás equivocado	_ira__frustracion_
2021-04-12	no
2021-04-12	Pues le hubiera ayudado en todo y sería muy amable y podría hacer lo posible para que esté a gusto	_las_dos_ranas__arreglar_al_mundo__un_payaso_muy_inquieto__nestor_el_castor__destino_o_libre_albedrio_
2021-04-12	Pues me siento mal por que, estoy agobiada por los exámenes y hecho de menos a una persona y quiero verla ya entonces y me preocupo y también estoy agobiada por que tengo que estudiar	_frustracion__miedo__compasion__alegria__amor_
2021-04-12	Si
2021-04-12	Si
2021-04-12	si
2021-04-12	si
2021-04-12	si
2021-04-12	si
2021-04-12	Tristeza y amabilidad	_el_amor_y_el_tiempo__una_sonrisa__el_tren_de_la_vida__la_fabula_del_helecho_y_el_bambu__un_payaso_muy_inquieto_
2021-04-12	A mis amigos	_la_oruga__entrevista_a_dios__el_tren_de_la_vida__suenyo__pedro_y_el_hilo_magico_
2021-04-12	Bueno más o menos si lo sabía	_nestor_el_castor__las_dos_vasijas_de_agua__pedro_y_el_hilo_magico__la_ultima_casa_del_carpintero__el_balde_chino_
2021-04-12	Cuando el maestro cuenta la historia del hombre de los zapatos.	_destino_o_libre_albedrio__pedro_y_el_hilo_magico__semillas__dinero__el_aborto_un_cuento_de_horror_
2021-04-12	Duda, arrogancia, frustración	_destino_o_libre_albedrio__carlota_y_su_mochila__entrevista_a_dios__las_siete_tinajas_de_oro__las_dos_vasijas_de_agua_
2021-04-12	La duda y cuando puedes cambiar tu destino.	_destino_o_libre_albedrio__el_arbol_confundido__el_capitan_y_el_grumete__bordados_de_la_vida__arreglar_al_mundo_
2021-04-12	No hace falta
2021-04-12	No
2021-04-12	No
2021-04-12	No
2021-04-12	no
2021-04-12	no
2021-04-12	Para saber que tu controlas tu vida	_un_payaso_muy_inquieto__la_ofensa__entrevista_a_dios__carlota_y_su_mochila__triple_filtro_
2021-04-12	Pues hice una cosa mala a una amiga por influencia de otra, yo me di cuenta y cambié todo sobre mi comportamiento.	_un_payaso_muy_inquieto__nestor_el_castor__el_valor_de_un_billete_de_100__los_dientes_del_sultan__suenyo_
2021-04-12	Que cada uno tiene un destino pero que puede cambiar depende de lo que hagas. Y tienes que ver todos los puntos de vista no solo el tuyo.	_destino_o_libre_albedrio__el_arbol_confundido__el_arbol_de_los_problemas__el_valor_de_un_billete_de_100__asamblea_en_la_carpinteria_
2021-04-12	Que me gusta como el autor ha hecho la historia del hombre de los zapatos	_destino_o_libre_albedrio__el_aborto_un_cuento_de_horror__semillas__el_acoso_a_marita_cuento_para_hablar_sobre_el_bullying_con_los_ninyos__pedro_y_el_hilo_magico_
2021-04-12	Que todo el mundo es propietario de su destino.	_destino_o_libre_albedrio__el_arbol_confundido__el_capitan_y_el_grumete__arreglar_al_mundo__suenyo_
2021-04-12	Si
2021-04-12	Si
2021-04-12	Si
2021-04-12	Si
2021-04-12	Si
2021-04-12	Si
2021-04-12	Si
2021-04-12	si
2021-04-12	si, con la duda porque no sabrías qué hacer.	_el_arbol_confundido__bordados_de_la_vida__destino_o_libre_albedrio__entrevista_a_dios__arreglar_al_mundo_
2021-04-12	Sigo hablando	_humillacion__fortaleza__ira__certeza__tristeza_
2021-04-12	Sigo hablando	_humillacion__fortaleza__ira__certeza__tristeza_
2021-04-12	A mucha gente le falta paz en su vida, (no es mi caso) y pienso que la paz es necesaria en la vida, entre otras cosas.	_un_payaso_muy_inquieto__carlota_y_su_mochila__el_aborto_un_cuento_de_horror__la_fabula_del_lapiz__almuerzo_con_dios_
2021-04-12	Educación y trabajo.	_carlota_y_su_mochila__arreglar_al_mundo__nestor_el_castor__te_compro_1_hora__bordados_de_la_vida_
2021-04-12	El término de paz, ante los trabajos...	_un_payaso_muy_inquieto__paz_en_medio_de_las_dificultades__las_mejores_semillas__la_ultima_casa_del_carpintero__bordados_de_la_vida_
2021-04-12	Estoy cansada	_agotamiento__aburrimiento_
2021-04-12	No cambiaría nada
2021-04-12	No
2021-04-12	No
2021-04-12	No, pienso que tensión e ira no son emociones que describan este cuento.	_paz_en_medio_de_las_dificultades__la_ofensa__el_capitan_y_el_grumete__entrevista_a_dios__deja_la_cuchara_
2021-04-12	Sí
2021-04-12	Sí
2021-04-12	Sí
2021-04-12	Sí
2021-04-12	Sí
2021-04-12	Sí
2021-04-12	Tengo hambre	_placer__agrado__ira__amor__humillacion_
2021-04-12	Creo que las emociones están muy bien escogidas	_el_tren_de_la_vida__arreglar_al_mundo__la_oruga__la_ofensa__dr_alexander_fleming_
2021-04-12	Creo que trata más sobre educación	_el_capitan_y_el_grumete__bordados_de_la_vida__semillas__arreglar_al_mundo__la_ofensa_
2021-04-12	La Tortuga me cae bien	_carlota_y_su_mochila_
2021-04-12	La verdad es que me gustaría tener unas vacaciones	_diversion__tristeza__certeza__duda__agrado_
2021-04-12	Me gustaría q me recomendaras un libro de deportes	_placer__diversion__miedo__alegria__agrado_
2021-04-12	Ninguna
2021-04-12	No se que es fogoso/a
2021-04-12	No tengo argumentos en contra
2021-04-12	No
2021-04-12	No
2021-04-12	No, porque el libro es muy bueno	_carlota_y_su_mochila__un_payaso_muy_inquieto__destino_o_libre_albedrio__los_lobos__el_acoso_a_marita_cuento_para_hablar_sobre_el_bullying_con_los_ninyos_
2021-04-12	o un maestro	_deja_la_cuchara__dinero__una_taza_de_te__semillas__la_ofensa_
2021-04-12	O un psi
2021-04-12	Pero no un libro tan antiguo	_entusiasmo__tristeza__alegria__placer__calma_
2021-04-12	Porque creo que pasa en la vida real y a mucha gente	_el_capitan_y_el_grumete__leyenda_china__pedro_y_el_hilo_magico__los_dientes_del_sultan__un_payaso_muy_inquieto_
2021-04-12	psicologo
2021-04-12	Que hay que valorar lo que uno tiene	_carlota_y_su_mochila__el_valor_de_un_billete_de_100__reflejo_de_tus_actos__bordados_de_la_vida__calidad_emocional_
2021-04-12	Que valores lo q tienes	_el_valor_de_un_billete_de_100__triple_filtro__una_sonrisa__las_siete_tinajas_de_oro__nestor_el_castor_
2021-04-12	Quiero que me recomiendes un libro de deportes	_diversion__placer__alegria__calma__dolor_
2021-04-12	Si
2021-04-12	Si
2021-04-12	Si
2021-04-12	Si, la liga de el Barça y que Ansu Fati no salga bien de su lesión, el día de hoy al ser lunes me da pereza hacer todo
2021-04-12	Sigo hablando	_humillacion__fortaleza__ira__certeza__tristeza_
2021-04-12	Sigo hablando	_humillacion__fortaleza__ira__certeza__tristeza_
2021-04-12	Sigo hablando	_humillacion__fortaleza__ira__certeza__tristeza_
2021-04-12	Sigo hablando	_humillacion__fortaleza__ira__certeza__tristeza_
2021-04-12	Un adulto	_pedro_y_el_hilo_magico_
2021-04-12	Y el burro me desagrada	_sacudete__carlota_y_su_mochila__el_arbol_de_los_problemas__asamblea_en_la_carpinteria__reflejo_de_tus_actos_
2021-04-12	Y la moraleja también	_nestor_el_castor_
2021-04-12	Y ponerse en el lugar de los demás	_el_arbol_de_manzanas__reflejo_de_tus_actos__la_fabula_del_helecho_y_el_bambu__arreglar_al_mundo__construir_el_puente_
2021-04-12	Y ponerse en el lugar de los demás	_el_arbol_de_manzanas__reflejo_de_tus_actos__la_fabula_del_helecho_y_el_bambu__arreglar_al_mundo__construir_el_puente_
2021-04-12	Yo no cambiaría nada y la expresaría tal cual está
2021-04-12	A algún amigo	_la_oruga__entrevista_a_dios__el_tren_de_la_vida__suenyo__pedro_y_el_hilo_magico_
2021-04-12	A ser feliz y sonreír	_almuerzo_con_dios__una_sonrisa__el_arbol_de_manzanas__el_arbol_de_los_problemas__semillas_
2021-04-12	Agrado	_los_dientes_del_sultan__nestor_el_castor_
2021-04-12	Ayer me quedé hasta tarde despierto	_aburrimiento__tristeza__duda__ira__humillacion_
2021-04-12	La felicidad	_la_fabula_del_helecho_y_el_bambu__almuerzo_con_dios__entrevista_a_dios__amar_lo_que_somos__las_cuatro_velas_
2021-04-12	La verdad que son más placenteras	_tristeza__certeza__duda__diversion__amor_
2021-04-12	Me siento cansado	_agotamiento__aburrimiento_
2021-04-12	No creo
2021-04-12	No es nada de eso, sino es que no he dormido mucho anoche
2021-04-12	No hay personajes
2021-04-12	No hay personajes
2021-04-12	No
2021-04-12	No
2021-04-12	No
2021-04-12	No
2021-04-12	No
2021-04-12	Porque con una cosa tan mínima puedes hacer feliz a otra persona	_destino_o_libre_albedrio__el_arbol_de_los_problemas__las_siete_tinajas_de_oro__los_ingredientes_del_bizcocho__cuando_el_viento_sopla_
2021-04-12	Porque me gusta sonreír y me gusta que me vean feliz	_las_siete_tinajas_de_oro__semillas__la_fabula_del_lapiz__el_arbol_de_los_problemas__el_arbol_de_manzanas_
2021-04-12	Que sonriamos que es gratis y ayudamos a la gente	_leyenda_china__entrevista_a_dios__el_capitan_y_el_grumete__carlota_y_su_mochila__el_arbol_de_manzanas_
2021-04-12	Si
2021-04-12	Si estoy de acuerdo	_destino_o_libre_albedrio__asamblea_en_la_carpinteria_
2021-04-12	Si
2021-04-12	Si
2021-04-12	Si
2021-04-12	Si
2021-04-12	Si
2021-04-12	Si, lo ha transformado correctamente	_suenyo__pedro_y_el_hilo_magico_
2021-04-12	Sonriendo para hacerlas felices	_el_arbol_de_los_problemas__el_arbol_de_manzanas__almuerzo_con_dios__el_arbol_confundido__las_mejores_semillas_
2021-04-12	Tengo sueño	_tristeza__agotamiento__placer__agrado__ira_
2021-04-12	Yo creo que no	_el_tren_de_la_vida__el_capitan_y_el_grumete__bordados_de_la_vida__un_payaso_muy_inquieto__una_sonrisa_
2021-04-12	Pues que tengan en cuenta a su gente de su alrededor	_carlota_y_su_mochila__entrevista_a_dios__leyenda_china__el_capitan_y_el_grumete__reflejo_de_tus_actos_
2021-04-12	A ver lo de ‘adolescencia y educación ’ no me parece, porque está más inclinado a trabajo	_el_valor_de_un_billete_de_100__carlota_y_su_mochila__la_ofensa__te_compro_1_hora__el_acoso_a_marita_cuento_para_hablar_sobre_el_bullying_con_los_ninyos_
2021-04-12	Es verdad, porque las cosas materiales no duran, pero las memorias si	_construir_el_puente__los_dientes_del_sultan__la_fabula_del_lapiz__triple_filtro__cuando_el_viento_sopla_
2021-04-12	no, no tanto
2021-04-12	Que hay que pasar más tiempo con las personas a las que tienes a tu alrededor	_la_fabula_del_helecho_y_el_bambu__carlota_y_su_mochila__el_valor_de_un_billete_de_100__necesito_un_abrazo__el_capitan_y_el_grumete_
2021-04-12	Que no todo tiene que ser por dinero	_el_valor_de_un_billete_de_100__el_arbol_de_manzanas__entrevista_a_dios__te_compro_1_hora__un_payaso_muy_inquieto_
2021-04-12	Si me parece que si	_bordados_de_la_vida__calidad_emocional__carlota_y_su_mochila__los_ingredientes_del_bizcocho__el_amor_y_el_tiempo_
2021-04-12	Si
2021-04-12	Si, define muy bien lo que se siente al estar en duda	_bordados_de_la_vida__el_arbol_confundido__destino_o_libre_albedrio__entrevista_a_dios__arreglar_al_mundo_
2021-04-12	Si, es
2021-04-12	Si, porque el niño sólo quería estar con su padre	_el_acoso_a_marita_cuento_para_hablar_sobre_el_bullying_con_los_ninyos__entrevista_a_dios__bordados_de_la_vida__semillas__carlota_y_su_mochila_
2021-04-12	Si, yo creo que si	_el_tren_de_la_vida__el_capitan_y_el_grumete__bordados_de_la_vida__un_payaso_muy_inquieto__una_sonrisa_
2021-04-12	Deberían haber enseñado cómo llegar a esa realidad deseada	_la_oruga__suenyo__amar_lo_que_somos__las_siete_tinajas_de_oro__una_taza_de_te_
2021-04-12	Dime otra reflexión	_duda__tristeza__humillacion__alegria__placer_
2021-04-12	el Día me va muy bien pero estoy un poco aburrida	_aburrimiento__arrogancia__tristeza__frustracion__fortaleza_
2021-04-12	Gente con poca motivación, baja autoestima ....	_estrellas_de_mar_en_la_playa__entrevista_a_dios__leyenda_china__el_capitan_y_el_grumete_
2021-04-12	No
2021-04-12	No
2021-04-12	No
2021-04-12	No
2021-04-12	No
2021-04-12	No
2021-04-12	No, porque Sueño no hizo nada para llegar a su meta, no muestro lo duro que algunos tienen que trabajar para llegar ahí	_pedro_y_el_hilo_magico__el_aborto_un_cuento_de_horror__el_tren_de_la_vida__carlota_y_su_mochila__un_payaso_muy_inquieto_
2021-04-12	Que soy capaz de hacer mis sueños realidad	_suenyo__la_oruga__un_payaso_muy_inquieto__los_dientes_del_sultan__pedro_y_el_hilo_magico_
2021-04-12	Sí
2021-04-12	Sí
2021-04-12	Sí
2021-04-12	Sí, pero creo que se podría haber explicado mejor	_un_payaso_muy_inquieto__paz_en_medio_de_las_dificultades__carlota_y_su_mochila__arreglar_al_mundo__una_sonrisa_
2021-04-12	Sí, pero podrían poner que sueño trabaja muy duro y es constante para llegar a su meta	_suenyo__la_oruga__carlota_y_su_mochila__el_arbol_de_los_problemas__un_payaso_muy_inquieto_
2021-04-12	Sí, porque sueño estaba entusiasmado con los alimentos del mensajero	_suenyo__el_aborto_un_cuento_de_horror__la_oruga__pedro_y_el_hilo_magico__el_tren_de_la_vida_
2021-04-12	Sí, que lo único que les está apartando de su sueño son ellos mismos	_carlota_y_su_mochila__el_aborto_un_cuento_de_horror__pedro_y_el_hilo_magico__un_payaso_muy_inquieto__la_oruga_
2021-04-12	Sí,
2021-04-12	Sigue hablando	_humillacion__fortaleza__ira__certeza__tristeza_
2021-04-12	Una persona adulta	_pedro_y_el_hilo_magico__el_capitan_y_el_grumete__la_oruga__carlota_y_su_mochila__necesito_un_abrazo_
2021-04-12	Yo creo que por escribir, ya que no me ha servido de inspiración el cuento y no me ha ayudado	_la_fabula_del_lapiz__necesito_un_abrazo__un_vaso_de_leche__carlota_y_su_mochila__leyenda_china_
2021-04-12	????
2021-04-12	El cuento de lobos supongo que si	_los_lobos_
2021-04-12	El día agotado porque hoy es lunes	_agotamiento_
2021-04-12	Este cuento está muy guay
2021-04-12	La última parte la de el muchacho preguntas a cual al que alimentes	_el_aborto_un_cuento_de_horror__carlota_y_su_mochila__pedro_y_el_hilo_magico__dr_alexander_fleming__el_arbol_de_manzanas_
2021-04-12	No tiene porque
2021-04-12	Nose que cuento recomendar
2021-04-12	Nose
2021-04-12	Ok
2021-04-12	Por que me gusto el cuento entretenido	_nestor_el_castor__arreglar_al_mundo__una_sonrisa__las_siete_tinajas_de_oro__la_fabula_del_lapiz_
2021-04-12	Pues deberían ser libres en elegir los sentimientos de positivos o negativos pero sería mejor que casi o todos los sentimientos serían positivos	_los_lobos__el_capitan_y_el_grumete__un_payaso_muy_inquieto__los_dientes_del_sultan__una_sonrisa_
2021-04-12	Quiero que ya sea finde semana	_tristeza__fortaleza__humillacion__frustracion__arrogancia_
2021-04-12	Quiero saber sobre los lobos	_malestar__fobia__arrogancia__humillacion__miedo_
2021-04-12	Sí
2021-04-12	Sí
2021-04-12	Sí
2021-04-12	Agradado	_nestor_el_castor_
2021-04-12	Bueno pues estoy contento y un poco cansado	_alegria__entusiasmo__agotamiento__aburrimiento__agrado_
2021-04-12	Bueno pues me siento bien	_amor__entusiasmo__placer__alegria__diversion_
2021-04-12	El cuento me envoca que el paz no es un lugar sin problemas si no es un lugar donde tu corazón está relajado y estás contento	_paz_en_medio_de_las_dificultades__deja_la_cuchara__las_mejores_semillas__los_lobos__el_aborto_un_cuento_de_horror_
2021-04-12	Hola
2021-04-12	me considero 7.5 de felicidad	_tristeza__amor__calma__entusiasmo__placer_
2021-04-12	No
2021-04-12	no
2021-04-12	Si estoy de acuerdo con esa moraleja porque no creo que haya algún lugar que no hay problemas y	_nestor_el_castor_
2021-04-12	Si estoy de acuerdo	_destino_o_libre_albedrio__asamblea_en_la_carpinteria_
2021-04-12	Si
2021-04-12	Si
2021-04-12	tambien tengo hambre porque está mañana no he comido nada	_placer__agrado__ira__amor__humillacion_
2021-04-12	Trabajo	_un_payaso_muy_inquieto__el_acoso_a_marita_cuento_para_hablar_sobre_el_bullying_con_los_ninyos__el_arbol_confundido__carlota_y_su_mochila__la_fabula_del_helecho_y_el_bambu_
2021-04-12	Yo estoy cansado porque ayer no dormí bien	_agotamiento__aburrimiento_
2021-04-12	L
2021-04-12	No
2021-04-12	P
2021-04-12	Que al fondos somos todos libres	_los_lobos__destino_o_libre_albedrio__carlota_y_su_mochila__un_payaso_muy_inquieto__sacudete_
2021-04-12	Si
2021-04-12	Si
2021-04-12	A los que están peleados con alguien
2021-04-12	Aborto, drogas, Alcohol, etc...	_el_aborto_un_cuento_de_horror_
2021-04-12	Cuando peleo con alguien, aunque en este caso el carpintero somos los dos peleados	_construir_el_puente__el_arbol_de_los_problemas__la_ultima_casa_del_carpintero__asamblea_en_la_carpinteria__las_dos_ranas_
2021-04-12	El Carpintero	_la_ultima_casa_del_carpintero__construir_el_puente__asamblea_en_la_carpinteria__el_arbol_de_los_problemas__la_fabula_del_lapiz_
2021-04-12	Esta bien el cuentoo	_dinero__construir_el_puente_
2021-04-12	mas o menos
2021-04-12	Más o menos
2021-04-12	Me gusta esa cita, pero solo incita a que dejemos lo importante para mañana	_diversion__frustracion__ira__entusiasmo__miedo_
2021-04-12	Me siento fuerte, por mi capacidad física y por mi exterior, pero pienso que soy una persona muy débil en mi interior, lo que opinen otros de mi no me afecta lo más mínimo, pero igualmente soy débil emocionalmente	_ira__agotamiento__certeza__tristeza__alegria_
2021-04-12	Me siento
2021-04-12	Muchas cosas la verdad	_los_dientes_del_sultan__la_fabula_del_lapiz__triple_filtro__cuando_el_viento_sopla__un_payaso_muy_inquieto_
2021-04-12	Ninguna
2021-04-12	No
2021-04-12	No
2021-04-12	No se
2021-04-12	No se, pero me ha gustado mucho el cuento	_nestor_el_castor__las_siete_tinajas_de_oro__la_fabula_del_lapiz__paz_en_medio_de_las_dificultades__semillas_
2021-04-12	No
2021-04-12	No
2021-04-12	No, no cambiaria nada
2021-04-12	No, no hay cierta ternura en lo que he dicho
2021-04-12	Ok, si, también de la libertad, al final	_el_aborto_un_cuento_de_horror__la_ofensa__el_capitan_y_el_grumete__la_fabula_del_lapiz__amar_lo_que_somos_
2021-04-12	Perdona, no se a completado la frase	_amor__deseo__aburrimiento_
2021-04-12	Que no hay que ayudar a los otros a odiarse, si no amarse
2021-04-12	Si
2021-04-12	Si
2021-04-12	Si
2021-04-12	Si
2021-04-12	Si
2021-04-12	Si
2021-04-12	Si
2021-04-12	Si, es bonito	_semillas__destino_o_libre_albedrio__pedro_y_el_hilo_magico__carlota_y_su_mochila_
2021-04-12	Si, lo estoy
2021-04-12	¿no entiendo lo q me dices hij@?
2021-04-12	A facor	_dr_alexander_fleming_
2021-04-12	Apatía quizas	_tristeza__tension__aburrimiento__agrado__satisfaccion_
2021-04-12	Calla	_diversion_
2021-04-12	Cuéntame tu sobre tu vida	_ira__certeza__arrogancia__miedo__fobia_
2021-04-12	dkldos
2021-04-12	dkow
2021-04-12	Empieza de nuevo	_frustracion__apatia__fortaleza__miedo__satisfaccion_
2021-04-12	familiares
2021-04-12	Hijieejwiowkdiwowkkdd
2021-04-12	Intuyo ShowgiwgfsuysTtds7Djieiwhdgwyfws Jdkwiwkdmdo
2021-04-12	kdkdo
2021-04-12	la Parte del profesor	_los_ingredientes_del_bizcocho__el_acoso_a_marita_cuento_para_hablar_sobre_el_bullying_con_los_ninyos__la_ofensa__la_fabula_del_lapiz__dr_alexander_fleming_
2021-04-12	Mal, aburrido, cansado y sin ganas	_aburrimiento_
2021-04-12	Me identifico
2021-04-12	me identifico en que me cuesta concentrarme, porque estoy rallado con mis cosas.	_pedro_y_el_hilo_magico__asamblea_en_la_carpinteria__deja_la_cuchara__carlota_y_su_mochila__una_sonrisa_
2021-04-12	No
2021-04-12	No es habitual,
2021-04-12	no no quiero
2021-04-12	no que yo sepa, pero seguro que alguien si	_triple_filtro__carlota_y_su_mochila__el_arbol_confundido__el_arbol_de_los_problemas__arreglar_al_mundo_
2021-04-12	no quiero
2021-04-12	No
2021-04-12	no
2021-04-12	no
2021-04-12	No
2021-04-12	no
2021-04-12	no
2021-04-12	No
2021-04-12	no
2021-04-12	no
2021-04-12	no
2021-04-12	no
2021-04-12	No
2021-04-12	nop
2021-04-12	PACIENCIA LA MADRE DE LA CIENCIA	_bordados_de_la_vida__el_tren_de_la_vida__el_aborto_un_cuento_de_horror__necesito_un_abrazo__el_amor_y_el_tiempo_
2021-04-12	para ayudar	_las_mejores_semillas__el_amor_y_el_tiempo__el_alacran__un_payaso_muy_inquieto__sacudete_
2021-04-12	para que se concentrem	_asamblea_en_la_carpinteria_
2021-04-12	poca energia	_ira__amor__tension__alegria__aburrimiento_
2021-04-12	Puede ser	_apatia__deseo__fobia__fortaleza__arrogancia_
2021-04-12	Que te puedes manejar tu mismo sin distracciones	_nestor_el_castor__deja_la_cuchara__asamblea_en_la_carpinteria__las_dos_vasijas_de_agua__el_acoso_a_marita_cuento_para_hablar_sobre_el_bullying_con_los_ninyos_
2021-04-12	que?
2021-04-12	Se me a pasado q son las cosas que me pasan a mi	_el_arbol_de_los_problemas__bordados_de_la_vida__un_payaso_muy_inquieto__destino_o_libre_albedrio__el_capitan_y_el_grumete_
2021-04-12	seh
2021-04-12	si estoy de acuerdo	_destino_o_libre_albedrio__asamblea_en_la_carpinteria_
2021-04-12	si lo pienso	_alegria__satisfaccion__agrado__miedo__aburrimiento_
2021-04-12	Si
2021-04-12	Si
2021-04-12	si
2021-04-12	si
2021-04-12	Si
2021-04-12	Si, ¿porque no?
2021-04-12	Si, también
2021-04-12	yo aplicaría a la gente	_entrevista_a_dios__leyenda_china__el_capitan_y_el_grumete__carlota_y_su_mochila__construir_el_puente_
2021-04-12	yo creo que un joven docente	_un_vaso_de_leche__el_arbol_de_manzanas__te_compro_1_hora__almuerzo_con_dios__la_ofensa_
2021-04-12	yo hubiera hecho lo mismo	_el_arbol_confundido__dr_alexander_fleming__los_dientes_del_sultan__reflejo_de_tus_actos__la_oruga_
2021-04-12	A lo mejor le puede ayudar a mente con estres	_deja_la_cuchara__paz_en_medio_de_las_dificultades__el_capitan_y_el_grumete__sacudete__arreglar_al_mundo_
2021-04-12	A mis amigos y a mi familia	_pedro_y_el_hilo_magico__la_oruga__entrevista_a_dios__el_tren_de_la_vida__suenyo_
2021-04-12	Apatía,tensión,malestar	_deja_la_cuchara__paz_en_medio_de_las_dificultades__la_ofensa__pedro_y_el_hilo_magico__arreglar_al_mundo_
2021-04-12	Así a lo mejor a la je te que	_pedro_y_el_hilo_magico__el_capitan_y_el_grumete__asamblea_en_la_carpinteria__carlota_y_su_mochila__triple_filtro_
2021-04-12	Estres	_deja_la_cuchara__paz_en_medio_de_las_dificultades__el_capitan_y_el_grumete__entrevista_a_dios__la_ofensa_
2021-04-12	No cambiaria nada
2021-04-12	Si porque el libro está muy bien	_destino_o_libre_albedrio__los_lobos__carlota_y_su_mochila__un_payaso_muy_inquieto_
2021-04-12	Si
2021-04-12	Si
2021-04-12	si
2021-04-12	si
2021-04-12	Sí
2021-04-12	Sí
2021-04-12	Sí
2021-04-12	Tensión y humillación	_el_valor_de_un_billete_de_100__deja_la_cuchara__paz_en_medio_de_las_dificultades__la_ofensa__el_capitan_y_el_grumete_
2021-04-12	No añadiría ni cambiaría nada, me gusta el mensaje que transmite
2021-04-12	No veo que haya nada que cambiar
2021-04-12	No, esta bien.	_dinero__construir_el_puente_
2021-04-12	Pues me siento, confundida y aburrida de la monotonía de todos los días.	_aburrimiento__tristeza__fortaleza__arrogancia__frustracion_
2021-04-12	Pues me siento, confundida y aburrida de la monotonía de todos los días.	_aburrimiento__tristeza__fortaleza__arrogancia__frustracion_
2021-04-12	Pues no se, es que para mi las tareas nunca son placenteras.	_aburrimiento__duda_
2021-04-12	Si
2021-04-12	si
2021-04-12	Si
2021-04-12	Si
2021-04-12	La moraleja de este cuento es “si lo intentas seguro que lo consigues” “si no lo consigues inténtalo más veces y con más atención”.	_el_arbol_confundido__carlota_y_su_mochila__nestor_el_castor__la_fabula_del_lapiz__las_dos_ranas_
2021-04-12	No
2021-04-12	No, yo creo que solo habla de calma tensión.	_deja_la_cuchara__paz_en_medio_de_las_dificultades__el_capitan_y_el_grumete__la_ofensa__un_payaso_muy_inquieto_
2021-04-12	Si estoy de acuerdo	_destino_o_libre_albedrio__asamblea_en_la_carpinteria_
2021-04-12	Si estoy de acuerdo	_destino_o_libre_albedrio__asamblea_en_la_carpinteria_
2021-04-12	Si
2021-04-12	Si
2021-04-12	A ser feliz le doy mucha importancia, porque en este momento no encuentro razones para estar triste o enfadada, aunque no siempre sea así, ya que pienso que no es malo estar triste.	_alegria__malestar__amor__tristeza__arrogancia_
2021-04-12	Estoy tranquila y contenta. A veces me agobio porque no salga algo bien.	_entusiasmo__frustracion__agrado__satisfaccion__calma_
2021-04-12	No encuentro otra emoción de la que trate.
2021-04-12	No encuentro un tema
2021-04-12	No
2021-04-12	Sí
2021-04-12	Sí
2021-04-12	Sí
2021-04-12	Sí, me considero feliz.	_alegria_
2021-04-12	al carpintero	_la_ultima_casa_del_carpintero__construir_el_puente__asamblea_en_la_carpinteria__el_arbol_de_los_problemas_
2021-04-12	Al principio los personajes se intentan dr	_un_payaso_muy_inquieto__arreglar_al_mundo__el_aborto_un_cuento_de_horror__el_valor_de_un_billete_de_100__pedro_y_el_hilo_magico_
2021-04-12	algunas situaciones del día a dia	_el_aborto_un_cuento_de_horror__necesito_un_abrazo__el_capitan_y_el_grumete__los_ingredientes_del_bizcocho__bordados_de_la_vida_
2021-04-12	Bullying y trabajo	_el_acoso_a_marita_cuento_para_hablar_sobre_el_bullying_con_los_ninyos__triple_filtro__un_payaso_muy_inquieto__el_arbol_confundido__carlota_y_su_mochila_
2021-04-12	Estoy en una situación de duda y tensión constante en el instituto	_duda__arrogancia__certeza__malestar__agotamiento_
2021-04-12	Me parece bien	_duda__amor__entusiasmo__miedo__malestar_
2021-04-12	mi aspecto perceptivo de cara a las personas	_las_siete_tinajas_de_oro__paz_en_medio_de_las_dificultades__pedro_y_el_hilo_magico__el_capitan_y_el_grumete__la_oruga_
2021-04-12	No juzgues a un pez por su habilidad de trepar árboles
2021-04-12	No
2021-04-12	No
2021-04-12	para ayudar a otros y darles a entender una situación	_el_aborto_un_cuento_de_horror__el_capitan_y_el_grumete__el_valor_de_un_billete_de_100__el_tren_de_la_vida__los_ingredientes_del_bizcocho_
2021-04-12	Porque suelo buscar la buena cara de las personas	_carlota_y_su_mochila__almuerzo_con_dios__la_ofensa__las_dos_ranas__los_ingredientes_del_bizcocho_
2021-04-12	Si
2021-04-12	Si
2021-04-12	Si
2021-04-12	Si
2021-04-12	Tensión	_deja_la_cuchara__paz_en_medio_de_las_dificultades__la_ofensa__el_capitan_y_el_grumete__entrevista_a_dios_
2021-04-12	todos a favor	_la_ultima_casa_del_carpintero__carlota_y_su_mochila_
2021-04-12	Un joven	_un_vaso_de_leche__el_arbol_de_manzanas__te_compro_1_hora__almuerzo_con_dios__la_ofensa_
2021-04-12	?
2021-04-12	En el día de hoy estoy muy cansada ya que no duermo mucho últimamente y a parte estoy muy aburrida de la rutina de siempre	_agotamiento__aburrimiento__arrogancia__tristeza__frustracion_
2021-04-12	Es exactamente la que creía yo que era	_el_tren_de_la_vida__el_capitan_y_el_grumete__bordados_de_la_vida__un_payaso_muy_inquieto__una_sonrisa_
2021-04-12	es que no tengo ganas ni fuerza para hacer nada solo quiero descansar
2021-04-12	Exacto, es sensación de fatiga y debilidad. Es que ya es un agotamiento mental de tantas cosas q lleva una encima	_agotamiento__tension__placer__ira__frustracion_
2021-04-12	Fij
2021-04-12	Hola
2021-04-12	Totalmente
2021-04-12	y encima la migraña que tengo me agota mucho	_agotamiento__agrado__ira__amor__humillacion_
2021-04-12	y entre los baloncesto y los estudios no puedo más	_dolor__tension__aburrimiento__duda__amor_
2021-04-12	Y y
2021-04-12	Yo soy feliz pero ahora mismo no estoy en mis mejores momentos. Yo creo q estoy en un 6-7 Fin	_alegria__fortaleza__tristeza__humillacion__malestar_
2021-04-12	Ah weno
2021-04-12	Conocía el cuento en si	_dr_alexander_fleming__suenyo__almuerzo_con_dios__el_arbol_de_los_problemas__el_aborto_un_cuento_de_horror_
2021-04-12	Hoy me encuentro bastante bien, no tengo ningún problema en concreto	_tristeza__ira__placer__tension__frustracion_
2021-04-12	Me dio lastima el primer sabio, no es su culpa que el sultán no sea capaz de afrontar la verdad	_amar_lo_que_somos__los_dientes_del_sultan__el_capitan_y_el_grumete__arreglar_al_mundo__el_arbol_confundido_
2021-04-12	Me recuerda a que depende cómo te expreses vas a causar diversas reacciones.	_calidad_emocional__triple_filtro__el_acoso_a_marita_cuento_para_hablar_sobre_el_bullying_con_los_ninyos__el_alacran__carlota_y_su_mochila_
2021-04-12	No del todo
2021-04-12	No sabría decir
2021-04-12	No sabría que decir
2021-04-12	No se
2021-04-12	No todos los adjetivos describen a este cuento
2021-04-12	No
2021-04-12	No
2021-04-12	Podría ayudar a las personas con muchas dudas quizás	_destino_o_libre_albedrio__arreglar_al_mundo__entrevista_a_dios__el_tren_de_la_vida__el_ingenio_de_una_hormiga_
2021-04-12	Puede ser, depende de cómo cada persona enfoque el cuento.	_la_fabula_del_lapiz__la_fabula_del_helecho_y_el_bambu__dinero__necesito_un_abrazo__los_ingredientes_del_bizcocho_
2021-04-12	Si
2021-04-12	Si
2021-04-12	Si
2021-04-12	Si
2021-04-12	Si
2021-04-12	Si, ha estado interesante	_el_balde_chino__el_capitan_y_el_grumete_
2021-04-12	Barsa o Madrid	_diversion_
2021-04-12	10	_alegria__diversion__ira_
2021-04-12	Barsa o madrid	_diversion_
2021-04-12	Eres muy feliz	_alegria_
2021-04-12	Kfiifnv
2021-04-12	La miel es mi comida fAvorita	_placer__diversion__tristeza_
2021-04-12	Me gusta la miel	_agrado__placer__miedo__frustracion_
2021-04-12	Para mi esta perfecta	_paz_en_medio_de_las_dificultades__el_balde_chino__amar_lo_que_somos__asamblea_en_la_carpinteria_
2021-04-12	Récomemdar cuento	_apatia__frustracion_
2021-04-12	Si
2021-04-12	Si
2021-04-12	Si
2021-04-12	Si
2021-04-12	Si
2021-04-12	soy del atlético de Madrid y tú	_diversion__frustracion__arrogancia__alegria__humillacion_
2021-04-12	vale	_arrogancia_
2021-04-12	El aburrimiento porque el niño a logrado fácilmente hacer el puzzle mirando el papel de otra forma	_arreglar_al_mundo__necesito_un_abrazo__pedro_y_el_hilo_magico__el_acoso_a_marita_cuento_para_hablar_sobre_el_bullying_con_los_ninyos__dinero_
2021-04-12	Estoy de acuerdo	_destino_o_libre_albedrio__asamblea_en_la_carpinteria_
2021-04-12	Estoy de acuerdo.	_destino_o_libre_albedrio__asamblea_en_la_carpinteria_
2021-04-12	Las personas que juegan al rompecabezas o que trabajan en informática o algún trabajo que haya que realizar elecciones	_la_oruga__arreglar_al_mundo__carlota_y_su_mochila__un_payaso_muy_inquieto__nestor_el_castor_
2021-04-12	Me evoca que el niño es más inteligente que el adulto	_el_acoso_a_marita_cuento_para_hablar_sobre_el_bullying_con_los_ninyos__pedro_y_el_hilo_magico__nestor_el_castor__necesito_un_abrazo__bordados_de_la_vida_
2021-04-12	No creo que trate de otra cosa.
2021-04-12	No
2021-04-12	Si estoy de acuerdo	_destino_o_libre_albedrio__asamblea_en_la_carpinteria_
2021-04-12	Si que hay que ver diversas formas de cómo hacer una cosa	_los_ingredientes_del_bizcocho__arreglar_al_mundo__los_dientes_del_sultan__la_fabula_del_lapiz__bordados_de_la_vida_
2021-04-12	Si
2021-04-12	Si
2021-04-12	7	_tristeza__ira_
2021-04-12	Disfrutar de la vida	_las_dos_ranas__calidad_emocional__pedro_y_el_hilo_magico__dr_alexander_fleming__el_arbol_confundido_
2021-04-12	Estoy bien contento emocionado	_entusiasmo_
2021-04-12	Estoy bien porque me voy a comprar un juguete de airsoft son como las nerfs	_aburrimiento__tristeza__humillacion__diversion__apatia_
2021-04-12	hola	_carlota_y_su_mochila__nestor_el_castor_
2021-04-12	K
2021-04-12	No
2021-04-12	Que la vida es corta y hay que disfrutarla y tu decides por tu propia vida	_pedro_y_el_hilo_magico__el_aborto_un_cuento_de_horror__la_ultima_casa_del_carpintero__el_valor_de_un_billete_de_100__el_ingenio_de_una_hormiga_
2021-04-12	Si
2021-04-12	Si
2021-04-12	Si
2021-04-12	Si
2021-04-12	Si
2021-04-12	Tristesa
2021-04-13	Estoy nervioso, tengo un examen y no he estudiado nada tío	_dolor__tension__tristeza__duda__miedo_
2021-04-13	Holaa
2021-04-26	.
2021-04-26	.
2021-04-26	.
2021-04-26	F	_humillacion__tristeza_
2021-04-26	Hola
2021-04-26	no
2021-04-26	Y aparte me estreso y luego me salen peor	_arrogancia__ira_
2021-04-26	No, actualmente no estoy triste
2021-04-26	Hoy es un buen día	_frustracion__arrogancia_
2021-04-26	Hoy estoy bien, estoy feliz y contenta.	_alegria_
2021-04-26	Me encuentro bastante bien	_ira__tristeza_
2021-04-26	No me considero triste	_frustracion__tristeza_
2021-04-26	Opino que es normal que se relacione con la alegria, son los adjetivos con los que se relacionan	_tristeza__alegria_
2021-04-26	Aburrimiento	_diversion__placer_
2021-04-26	Me duele la cabeza y estoy cansado. Estoy en el cole y las clases se hacen eternas y no me gusta esta clase de arte.	_miedo__tension_
2021-04-26	no
2021-04-26	Estoy bien, últimamente no me ha pasado nada interesante	_aburrimiento__ira_
2021-04-26	No, está más identificado con tranquilidad	_calma_
2021-04-26	Sí
2021-04-26	Estoy bien, bastante mejor de lo que estoy acostumbrado a estar	_frustracion__satisfaccion_
2021-04-26	Hola
2021-04-26	Vale	_arrogancia_
2021-04-26	Barcelona recomienda libro	_placer__calma_
2021-04-26	Contesta
2021-04-26	Esta noche no he dormido
2021-04-26	Estoy triste	_frustracion__tristeza_
2021-04-26	Hola
2021-04-26	Me gusta el futbol	_agrado__placer_
2021-04-26	No por que no he desayunado
2021-04-26	No
2021-04-26	Pero Messi es mejor	_frustracion__satisfaccion_
2021-04-26	Que
2021-04-26	tom Holland es buenisimo	_frustracion_
2021-04-26	Como puedo no estar cansado	_deseo__alegria_
2021-04-26	Como te encuentras	_tristeza__placer_
2021-04-26	Estoy bien	_ira__certeza_
2021-04-26	Hoy estoy cansado	_agotamiento__aburrimiento_
2021-04-26	Pero ayer estaba contento	_alegria__agrado_
2021-04-26	Si
2021-04-26	Tu como estas
2021-04-26	Pues por la mañana antes que me fui al cole, había un perro que era muy fino. Se cruzó la auto villa y un coche le atropelló.	_alegria__ira_
2021-04-26	Hoy estoy muy enfadada con una persona	_ira__malestar_
2021-04-26	Vale	_arrogancia_
2021-04-26	Lo veo bastante cierto	_certeza_
2021-04-26	Me siento bien hoy	_ira__certeza_
2021-04-26	Vamos
2021-04-26	En qué mis compañeros están más espabilados que yo
2021-04-26	Estoy humillado	_humillacion_
2021-04-26	Humillación	_humillacion__arrogancia_
2021-04-26	Nada más
2021-04-26	No lo se
2021-04-26	No tengo nada más
2021-04-26	No tengo nada más
2021-04-26	No
2021-04-26	No
2021-04-26	Estoy bien, pero un poco cansada y agobiada por el cole.	_frustracion__agotamiento_
2021-04-26	Hoy estoy bien. Aunque un poco agobiada con los exámenes.	_duda__frustracion_
2021-04-26	Hoy estoy un poco cansada	_agotamiento__aburrimiento_
2021-04-26	No
2021-04-26	No
2021-04-26	Un poco si
2021-04-26	Estoy bien	_ira__certeza_
2021-04-26	Mal	_aburrimiento__dolor_
2021-04-26	Opino que es cierto	_certeza_
2021-04-26	Estoy aburrida	_aburrimiento_
2021-04-26	Si
2021-04-26	Creo que si	_aburrimiento__frustracion_
2021-04-26	Estoy contenta	_alegria__agrado_
2021-04-26	No
2021-04-26	que es verdad	_certeza__duda_
2021-04-26	Que puede que sea verdad	_certeza__duda_
2021-04-26	Si
2021-04-26	También estoy tranquila y relajada	_calma__entusiasmo_
2021-04-26	Y el bullying no está nada bien, si yo viera a alguien hacerle bullying a otra persona lo pararia	_ira_
2021-04-26	Yo no creo que haya que darle mucha importancia a las cosas materiales, solo si es algo muy especial
2021-04-26	Estoy rs	_miedo__alegria_
2021-04-26	estresada	_tension_
2021-04-26	No
2021-04-26	Ok, estoy tensa por el estrés de los exámenes y con mi relación social con mis amigas	_tristeza__tension_
2021-04-26	Sí
2021-04-26	Ahora mismo si, pero otras veces no	_malestar__tension_
2021-04-26	El actual no, pero algunas veces si me siento así	_compasion__malestar_
2021-04-26	Lo que me da miedo en esta vida es quedarme solo, ya sea de parte de amigos como de familia	_tristeza__malestar_
2021-04-26	No la verdad que no	_certeza__duda_
2021-04-26	No lo sabía. Pues la verdad no se que decir	_certeza__tristeza_
2021-04-26	No todas pero casi todas
2021-04-26	bueno, me siento estresada y cansada	_agotamiento__tension_
2021-04-26	creo que me identifico con esta emoción.	_frustracion__aburrimiento_
2021-04-26	Felicidad	_tristeza__amor_
2021-04-26	Hoy me he sentido feliz	_alegria_
2021-04-26	Me Han reír mis amigas	_alegria__compasion_
2021-04-26	Ok
2021-04-26	Ok
2021-04-26	Ok
2021-04-26	Pues que me he reído mucho con mis amigos	_alegria__calma_
2021-04-26	Que me lo he pasado bien con mis amigos/as	_tristeza__alegria_
2021-04-26	Si
2021-04-26	Si
2021-04-26	Si
2021-04-26	Gracias	_arrogancia__agrado_
2021-04-26	Lo siento no me apetece	_deseo__tristeza_
2021-04-26	Me gustan la pizza	_agrado__placer_
2021-04-26	Me parece bien	_duda__ira_
2021-04-26	No hace falta
2021-04-26	No
2021-04-26	No
2021-04-26	No
2021-04-26	No
2021-04-26	Ok
2021-04-26	Ok
2021-04-26	Si
2021-04-26	Estoy cansado y tranquilo	_agotamiento__calma_
2021-04-26	Estoy tranquilo	_calma__entusiasmo_
2021-04-26	me he despertado hace poco y por eso estoy tranquilo	_entusiasmo__calma_
2021-04-26	me he despertado temprano	_ira_
2021-04-26	no
2021-04-26	no
2021-04-26	si
2021-04-26	Si
2021-04-26	ayer fue un buen dia	_frustracion__arrogancia_
2021-04-26	de acuerdo	_fortaleza__certeza_
2021-04-26	de acuerdo	_fortaleza__certeza_
2021-04-26	Hoy estoy bien	_ira__certeza_
2021-04-26	nestor el castor
2021-04-26	no
2021-04-26	no
2021-04-26	no
2021-04-26	no
2021-04-26	no
2021-04-26	no
2021-04-26	no
2021-04-26	no, porque estoy de chill
2021-04-26	no, porque hoy me he despertado de relax	_ira_
2021-04-26	no, porque si
2021-04-26	ok
2021-04-26	ok
2021-04-26	porque estoy bien	_ira__certeza_
2021-04-26	que es absurdo
2021-04-26	que esta bien	_ira__certeza_
2021-04-26	si
2021-04-26	si
2021-04-26	siiiiiiiiiiiiiiiii
2021-04-26	y porque me gustan las albóndigas	_agrado__placer_
2021-04-26	Yo ahora estoy bn
2021-04-26	Yo estoy feliz nada ams	_alegria_
2021-04-26	Bueno, hoy estoy relajado, un poco incómodo, pero muy tranquilo	_malestar__entusiasmo_
2021-04-26	Hoy estoy tranquilo, estoy relajado	_calma__entusiasmo_
2021-04-26	Hoy me noto con fuerzas, simplemente es una cosa que me está molestando ahora	_ira__alegria_
2021-04-26	Hoy tengo ganas de hacer muchas cosas	_alegria__malestar_
2021-04-26	No estoy enfadado, estoy muy bien, hoy estoy muy entusiasmado
2021-04-26	No tiene del todo que ver con eso
2021-04-26	No, estoy bien, es una cosa puntual	_ira__certeza_
2021-04-26	Pues que sí
2021-04-26	Sí, aunque quizá no estoy del todo calmado, pero sí bastante
2021-04-26	No
2021-04-26	Estoy mal pero hoy bien	_ira__compasion_
2021-04-26	No
2021-04-26	No
2021-04-26	Nooooooooooooooo
2021-04-26	Para ya
2021-04-26	Si
[truncated: 1,647 more rows]

## Sheet: Inf_Emotion_sentences
Dynamic table extracted from the "FrasesEmociones" table that counts the number of user interactions in the "talking about emotions" phase, to measure the degree of "engagement" of the users in this phase
Using this field, you can link with the data from the "Users" table, using the formula "=IF(ESERROR(VLOOKUP(B5;Users;2;FALSE));0;VLOOKUP(B5;Users;2;FALSE) )", where "B5" is the cell where the user name is in this table, and 2 is the column number of the "Users" table that you want to import to this table
	Number of user interactions
User	Number of user interactions			The same as the column of the number of interactions but ordered from highest to lowest number
adam1alb	34			84
adrian1alb	1			79
adrian2alb	17			73
albaa2alb	32			68
albag2alb	23			66
alberto	6			65
alberto1alb	7			64
alejandra3alb	18			61
alejandroi13alb	68			58
alejandrorj3alb	30			57
alejandrorp3alb	25			50
alfonso3alb	42			48
alvaro1alb	11			48
alvarom2alb	42			47
alvarot2alb	10			46
amaryllis1alb	8			44
ana3alb	17			43
anahernandez	1			42
anastasia3alb	18			42
andr	9			42
andres1alb	35			41
angelika1alb	20			41
anne4alb	46			40
antoniopmas	13			40
ariana3alb	7			39
bea4alb	19			38
beatriz4alb	5			38
carla3alb	15			37
carlota2alb	30			37
carlota3alb	22			37
carlota4alb	29			36
carmen1alb	31			35
carmenbd2alb	26			34
carmenl2alb	20			34
carolina4alb	25			34
claudiacut	1			32
connie1alb	50			32
crist	2			32
cristobalr3alb	26			32
cristobals3alb	24			32
dani4alb	43			32
daniel2alb	66			32
daniela1alb	13			32
danielc3alb	36			31
danielw3alb	32			31
daniw3alb	27			31
david3alb	21			31
denise1alb	9			30
denise1alb3493	8			30
denise1allo	38			30
elena2alb	32			30
emilio3alb	41			29
emiliof3alb	31			29
evaaasancheez22@gmail.com	5			28
felipe1alb	7			27
felipe4alb	32			27
francisco1alb	37			26
giovanni2alb	3			26
giovannialb2	9			25
gregory2alb	24			25
hugo2alb	31			25
hugo3alb	20			25
irene3alb	57			24
isabella4alb	38			24
ivan1alb	32			23
jamesr2alb	10			22
jes	65			22
jesus3alb	21			22
jimena3alb	6			22
julia3alb	13			22
kristijonas2alb	42			21
laura1alb	15			21
leo4alb	17			21
lola3alb	47			20
lucas4alb	14			20
luciagralla	2			20
ludwig1alb	3			20
luna2alb	48			20
magdalena3alb	34			20
manuel1alb	22			19
manuel4alb	6			19
marcos1alb	30			19
marcos3alb	14			19
marcos4alb	16			18
maria2alb	32			18
maria4alb	40			18
marino1alb	84			18
marta2alb	41			18
marta3alb	19			17
marta4alb	25			17
martin2alb	44			17
martina1alb	27			16
maxime1alb	10			16
maya	16			15
mencia146@gmail.com	10			15
mencia4alb	21			15
michaei.sanzd1alb	6			14
michael1alb	20			14
milan2alb	12			14
milan3alb	12			13
mortegac02@gmail.com	5			13
naim2alb	19			13
natalia2alb	19			12
nico2alb	3			12
nicolas2alb	22			11
nicole1alb	39			11
nikhil3alb	20			11
nuria1alb	58			10
oliver01alb	4			10
oliverj1alb	4			10
oliverl1alb	22			10
olivero1alb	79			10
oliveroconnor1alb	3			9
oscar4alb	37			9
pablo4alb	31			9
paola1alb	25			8
paula2alb	37			8
paula4alb	34			7
paulagh02	7			7
rahul2alb	48			7
rahul3alb	40			7
renee2alb	15			6
ricardo3alb	1			6
rim2alb	30			6
rodrigo2alb	18			6
ruari3alb	64			5
ruslan4alb	11			5
samuel2alb	32			5
santi3alb	61			5
santiago1alb	29			4
sarah4alb	11			4
saral4alb	18			3
sofia1alb	14			3
sofia3alb	20			3
stefano4alb	22			3
teresa2alb	18			2
teresa4alb	73			2
valeriacerdanjimenez@gmail.com	5			1
victor2alb	28			1
victor4alb	10			1
vladislav1alb	32			1
Total general	3469			24.6028
Average interactions per user	24.6028

## Sheet: Initial_emotions
Emotions selected by users at the beginning of each session with CuentosIE
Date on which the login with CuentosIE is made
	User selected emotional categories: separated by #
		In the following columns, the emotions in column C are separated, in order to be able to count each one of them. If nothing appears, it means that the user has not selected that emotion. At the end of the table the count of times each emotion has been selected is shown	Separated Emotional categories for counting issues
Date	Emotional Category	tension	aburrimiento	alegria	deseo	humillacion	malestar	tristeza	certeza	fortaleza	apatia	entusiasmo	calma	duda	placer	amor	valentia	diversion	dolor	frustracion	agotamiento	agrado	dependenciaEmocional	compasion	satisfaccion	apego	miedo	arrogancia	ira	fobia	odio	Gender	Date of Birth	Group of age
2021-05-24	agotamiento#																				agotamiento											0	0	Over 23
2021-04-26	alegria#			alegria																												0	0	Over 23
2021-05-24	alegria#frustracion#fortaleza#			alegria						fortaleza										frustracion												0	0	Over 23
2021-06-07	calma#												calma																			0	0	Over 23
2021-05-10	calma#aburrimiento#		aburrimiento										calma																			0	0	Over 23
2021-06-07	calma#aburrimiento#		aburrimiento										calma																			0	0	Over 23
2021-06-07	calma#aburrimiento#agrado#alegria#		aburrimiento	alegria									calma									agrado										0	0	Over 23
2021-05-24	calma#aburrimiento#alegria#dolor#amor#		aburrimiento	alegria									calma			amor			dolor													0	0	Over 23
2021-05-10	calma#agrado#												calma									agrado										0	0	Over 23
2021-05-10	calma#agrado#alegria#			alegria									calma									agrado										0	0	Over 23
2021-06-07	calma#agrado#alegria#entusiasmo#			alegria								entusiasmo	calma									agrado										0	0	Over 23
2021-04-29	calma#alegria#placer#miedo#			alegria									calma		placer												miedo					0	0	Over 23
2021-06-07	calma#apatia#										apatia		calma																			0	0	Over 23
2021-04-26	calma#certeza#compasion#diversion#agrado#alegria#placer#satisfaccion#deseo#amor#valentia#fortaleza#entusiasmo#humillacion#apego#			alegria	deseo	humillacion			certeza	fortaleza		entusiasmo	calma		placer	amor	valentia	diversion				agrado		compasion	satisfaccion	apego						0	0	Over 23
2021-06-07	calma#compasion#alegria#			alegria									calma											compasion								0	0	Over 23
2021-06-07	calma#diversion#alegria#			alegria									calma					diversion														0	0	Over 23
2021-06-07	calma#compasion#diversion#alegria#apego#			alegria									calma					diversion						compasion		apego						0	0	Over 23
2021-06-07	calma#diversion#agrado#alegria#fobia#			alegria									calma					diversion				agrado								fobia		0	0	Over 23
2021-06-07	calma#diversion#alegria#amor#dependenciaEmocional#			alegria									calma			amor		diversion					dependenciaEmocional									0	0	Over 23
2021-04-29	calma#duda#malestar#tristeza#dolor#frustracion#miedo#agotamiento#apego#dependenciaEmocional#						malestar	tristeza					calma	duda					dolor	frustracion	agotamiento		dependenciaEmocional			apego	miedo					0	0	Over 23
2021-06-07	calma#fortaleza#									fortaleza			calma																			0	0	Over 23
2021-04-29	calma#tension#certeza#duda#dolor#	tension							certeza				calma	duda					dolor													0	0	Over 23
2021-05-04	certeza#duda#diversion#agrado#alegria#tristeza#miedo#			alegria				tristeza	certeza					duda				diversion				agrado					miedo					0	0	Over 23
2021-05-10	compasion#deseo#apatia#				deseo						apatia													compasion								0	0	Over 23
2021-05-10	diversion#alegria#			alegria														diversion														0	0	Over 23
2021-04-26	diversion#alegria#amor#			alegria												amor		diversion														0	0	Over 23
2021-05-10	diversion#alegria#dolor#odio#			alegria														diversion	dolor												odio	0	0	Over 23
2021-05-10	duda#frustracion#agotamiento#													duda						frustracion	agotamiento											0	0	Over 23
2021-04-26	malestar#deseo#amor#humillacion#				deseo	humillacion	malestar									amor																0	0	Over 23
2021-06-07	malestar#tristeza#frustracion#agotamiento#dependenciaEmocional#						malestar	tristeza												frustracion	agotamiento		dependenciaEmocional									0	0	Over 23
2021-06-07	placer#														placer																	0	0	Over 23
2021-04-26	tension#aburrimiento#tristeza#placer#satisfaccion#frustracion#fobia#agotamiento#	tension	aburrimiento					tristeza							placer					frustracion	agotamiento				satisfaccion					fobia		0	0	Over 23
2021-06-16	tension#agotamiento#	tension																			agotamiento											0	0	Over 23
2021-05-04	tension#duda#deseo#odio#miedo#agotamiento#apatia#humillacion#dependenciaEmocional#	tension			deseo	humillacion					apatia			duda							agotamiento		dependenciaEmocional				miedo				odio	0	0	Over 23
2021-04-26	tension#duda#ira#aburrimiento#malestar#tristeza#dolor#satisfaccion#deseo#amor#miedo#agotamiento#entusiasmo#humillacion#dependenciaEmocional#	tension	aburrimiento		deseo	humillacion	malestar	tristeza				entusiasmo		duda		amor			dolor		agotamiento		dependenciaEmocional		satisfaccion		miedo		ira			0	0	Over 23
2021-04-29	tension#duda#tristeza#frustracion#deseo#amor#agotamiento#apatia#apego#	tension			deseo			tristeza			apatia			duda		amor				frustracion	agotamiento					apego						0	0	Over 23
2021-05-24	tension#tristeza#	tension						tristeza																								0	0	Over 23
2021-04-06	tension#duda#malestar#tristeza#dolor#frustracion#odio#agotamiento#apatia#humillacion#	tension				humillacion	malestar	tristeza			apatia			duda					dolor	frustracion	agotamiento										odio	0	0	Over 23
2021-06-07	alegria#			alegria																												0	0	Over 23
2021-06-07	certeza#alegria#			alegria					certeza																							0	0	Over 23
2021-06-07	alegria#			alegria																												0	0	Over 23
2021-05-10	duda#tristeza#entusiasmo#							tristeza				entusiasmo		duda																		0	0	Over 23
2021-04-26	miedo#humillacion#					humillacion																					miedo					0	0	Over 23
2021-04-26	tristeza#frustracion#							tristeza												frustracion												0	0	Over 23
2021-06-07	duda#aburrimiento#		aburrimiento											duda																		0	0	Over 23
2021-05-10	calma#diversion#alegria#tristeza#amor#			alegria				tristeza					calma			amor		diversion														0	0	Over 23
2021-05-10	calma#diversion#alegria#			alegria									calma					diversion														0	0	Over 23
2021-05-24	tension#	tension																														0	0	Over 23
2021-06-07	duda#aburrimiento#frustracion#deseo#amor#entusiasmo#		aburrimiento		deseo							entusiasmo		duda		amor				frustracion												0	0	Over 23
2021-05-10	diversion#alegria#placer#satisfaccion#entusiasmo#			alegria								entusiasmo			placer			diversion							satisfaccion							0	0	Over 23
2021-05-24	tristeza#entusiasmo#							tristeza				entusiasmo																				0	0	Over 23
2021-05-24	agotamiento#																				agotamiento											0	0	Over 23
2021-06-07	calma#apego#												calma													apego						0	0	Over 23
2021-06-07	placer#														placer																	0	0	Over 23
2021-06-07	tension#valentia#	tension															valentia															0	0	Over 23
2021-05-10	aburrimiento#alegria#agotamiento#		aburrimiento	alegria																	agotamiento											0	0	Over 23
2021-05-10	calma#alegria#entusiasmo#			alegria								entusiasmo	calma																			0	0	Over 23
2021-06-07	agrado#tristeza#							tristeza														agrado										0	0	Over 23
2021-06-07	agrado#tristeza#							tristeza														agrado										0	0	Over 23
2021-05-04	calma#frustracion#												calma							frustracion												0	0	Over 23
2021-04-26	tristeza#frustracion#							tristeza												frustracion												0	0	Over 23
2021-04-26	aburrimiento#malestar#		aburrimiento				malestar																									0	0	Over 23
2021-06-07	calma#tension#certeza#duda#compasion#ira#diversion#aburrimiento#agrado#malestar#alegria#tristeza#placer#dolor#satisfaccion#frustracion#deseo#fobia#amor#odio#valentia#miedo#fortaleza#agotamiento#entusiasmo#apatia#arrogancia#humillacion#apego#dependenciaEmocional#	tension	aburrimiento	alegria	deseo	humillacion	malestar	tristeza	certeza	fortaleza	apatia	entusiasmo	calma	duda	placer	amor	valentia	diversion	dolor	frustracion	agotamiento	agrado	dependenciaEmocional	compasion	satisfaccion	apego	miedo	arrogancia	ira	fobia	odio	0	0	Over 23
2021-04-26	calma#certeza#compasion#diversion#agrado#alegria#tristeza#placer#satisfaccion#deseo#amor#valentia#fortaleza#entusiasmo#arrogancia#apego#			alegria	deseo			tristeza	certeza	fortaleza		entusiasmo	calma		placer	amor	valentia	diversion				agrado		compasion	satisfaccion	apego		arrogancia				0	0	Over 23
2021-05-10	tension#duda#ira#aburrimiento#malestar#tristeza#dolor#frustracion#fobia#odio#miedo#agotamiento#apatia#humillacion#dependenciaEmocional#	tension	aburrimiento			humillacion	malestar	tristeza			apatia			duda					dolor	frustracion	agotamiento		dependenciaEmocional				miedo		ira	fobia	odio	0	0	Over 23
2021-05-16	tension#compasion#dolor#frustracion#	tension																	dolor	frustracion				compasion								0	0	Over 23
2021-04-09	alegria#placer#			alegria											placer																	0	0	Over 23
2021-04-29	calma#certeza#compasion#diversion#agrado#alegria#placer#satisfaccion#deseo#amor#			alegria	deseo				certeza				calma		placer	amor		diversion				agrado		compasion	satisfaccion							0	0	Over 23
2021-05-04	calma#certeza#compasion#diversion#agrado#alegria#placer#satisfaccion#deseo#amor#valentia#fortaleza#entusiasmo#arrogancia#apego#			alegria	deseo				certeza	fortaleza		entusiasmo	calma		placer	amor	valentia	diversion				agrado		compasion	satisfaccion	apego		arrogancia				0	0	Over 23
2021-04-29	duda#miedo#													duda													miedo					0	0	Over 23
2021-04-12	calma#agrado#												calma									agrado										0	0	Over 23
2021-05-04	calma#duda#agrado#alegria#satisfaccion#amor#entusiasmo#			alegria								entusiasmo	calma	duda		amor						agrado			satisfaccion							0	0	Over 23
2021-03-29	tristeza#							tristeza																								0	0	Over 23
2021-04-29	tension#diversion#alegria#satisfaccion#	tension		alegria														diversion							satisfaccion							0	0	Over 23
2021-04-29	tension#diversion#alegria#valentia#	tension		alegria													valentia	diversion														0	0	Over 23
2021-05-04	calma#certeza#duda#alegria#amor#valentia#fortaleza#apego#			alegria					certeza	fortaleza			calma	duda		amor	valentia									apego						0	0	Over 23
2021-04-29	tension#duda#tristeza#miedo#agotamiento#apatia#	tension						tristeza			apatia			duda							agotamiento						miedo					0	0	Over 23
2021-04-06	amor#															amor																0	0	Over 23
2021-04-06	calma#satisfaccion#												calma												satisfaccion							0	0	Over 23
2021-04-06	deseo#				deseo																											0	0	Over 23
2021-04-06	satisfaccion#frustracion#deseo#				deseo															frustracion					satisfaccion							0	0	Over 23
2021-04-29	frustracion#agotamiento#																			frustracion	agotamiento											0	0	Over 23
2021-04-06	agotamiento#																				agotamiento											0	0	Over 23
2021-04-06	calma#satisfaccion#amor#												calma			amor									satisfaccion							0	0	Over 23
2021-04-06	humillacion#					humillacion																										0	0	Over 23
2021-04-06	malestar#tristeza#dolor#frustracion#agotamiento#humillacion#					humillacion	malestar	tristeza											dolor	frustracion	agotamiento											0	0	Over 23
2021-04-06	tension#duda#agotamiento#	tension												duda							agotamiento											0	0	Over 23
2021-03-29	alegria#valentia#fortaleza#			alegria						fortaleza							valentia															0	0	Over 23
2021-04-29	duda#deseo#amor#miedo#				deseo									duda		amor											miedo					0	0	Over 23
2021-04-06	satisfaccion#frustracion#agotamiento#entusiasmo#											entusiasmo								frustracion	agotamiento				satisfaccion							0	0	Over 23
2021-04-06	tristeza#frustracion#agotamiento#							tristeza												frustracion	agotamiento											0	0	Over 23
2021-05-04	tension#tristeza#dolor#frustracion#apatia#humillacion#dependenciaEmocional#	tension				humillacion		tristeza			apatia								dolor	frustracion			dependenciaEmocional									0	0	Over 23
2021-04-06	alegria#satisfaccion#agotamiento#entusiasmo#			alegria								entusiasmo									agotamiento				satisfaccion							0	0	Over 23
2021-04-06	calma#alegria#entusiasmo#			alegria								entusiasmo	calma																			0	0	Over 23
2021-04-06	calma#malestar#frustracion#fobia#miedo#apatia#						malestar				apatia		calma							frustracion							miedo			fobia		0	0	Over 23
2021-04-06	tension#agotamiento#	tension																			agotamiento											0	0	Over 23
2021-04-06	tension#deseo#	tension			deseo																											0	0	Over 23
2021-05-04	calma#aburrimiento#agotamiento#		aburrimiento										calma								agotamiento											0	0	Over 23
2021-04-29	calma#placer#fortaleza#									fortaleza			calma		placer																	0	0	Over 23
2021-04-29	entusiasmo#											entusiasmo																				0	0	Over 23
2021-04-06	duda#alegria#amor#entusiasmo#			alegria								entusiasmo		duda		amor																0	0	Over 23
2021-04-06	tension#alegria#valentia#miedo#	tension		alegria													valentia										miedo					0	0	Over 23
2021-05-04	calma#compasion#satisfaccion#valentia#												calma				valentia							compasion	satisfaccion							0	0	Over 23
2021-05-04	calma#duda#agrado#amor#												calma	duda		amor						agrado										0	0	Over 23
2021-04-29	tension#duda#aburrimiento#agrado#frustracion#deseo#agotamiento#apatia#arrogancia#	tension	aburrimiento		deseo						apatia			duda						frustracion	agotamiento	agrado						arrogancia				0	0	Over 23
2021-04-29	tension#frustracion#agotamiento#	tension																		frustracion	agotamiento											0	0	Over 23
2021-04-29	tension#malestar#tristeza#frustracion#	tension					malestar	tristeza												frustracion												0	0	Over 23
2021-04-29	tristeza#frustracion#							tristeza												frustracion												0	0	Over 23
2021-04-06	alegria#			alegria																												0	0	Over 23
2021-04-06	calma#alegria#agotamiento#entusiasmo#			alegria								entusiasmo	calma								agotamiento											0	0	Over 23
2021-04-07	calma#tristeza#							tristeza					calma																			0	0	Over 23
2021-04-06	tension#agotamiento#apatia#	tension									apatia										agotamiento											0	0	Over 23
2021-04-06	tension#agrado#alegria#satisfaccion#amor#	tension		alegria												amor						agrado			satisfaccion							0	0	Over 23
2021-04-06	tension#duda#compasion#dolor#frustracion#miedo#apatia#	tension									apatia			duda					dolor	frustracion				compasion			miedo					0	0	Over 23
2021-04-06	tension#duda#compasion#dolor#frustracion#miedo#apatia#	tension									apatia			duda					dolor	frustracion				compasion			miedo					0	0	Over 23
2021-04-06	tension#duda#compasion#dolor#frustracion#miedo#apatia#	tension									apatia			duda					dolor	frustracion				compasion			miedo					0	0	Over 23
2021-04-06	tension#duda#compasion#dolor#miedo#agotamiento#apatia#	tension									apatia			duda					dolor		agotamiento			compasion			miedo					0	0	Over 23
2021-04-06	tension#duda#ira#malestar#tristeza#frustracion#miedo#agotamiento#apatia#	tension					malestar	tristeza			apatia			duda						frustracion	agotamiento						miedo		ira			0	0	Over 23
2021-04-06	tension#tristeza#miedo#	tension						tristeza																			miedo					0	0	Over 23
2021-05-13	fortaleza#									fortaleza																						0	0	Over 23
2021-05-04	malestar#entusiasmo#						malestar					entusiasmo																				0	0	Over 23
2021-05-04	tension#satisfaccion#frustracion#agotamiento#	tension																		frustracion	agotamiento				satisfaccion							0	0	Over 23
2021-04-06	alegria#agotamiento#entusiasmo#			alegria								entusiasmo									agotamiento											0	0	Over 23
2021-04-06	alegria#agotamiento#entusiasmo#			alegria								entusiasmo									agotamiento											0	0	Over 23
2021-04-06	entusiasmo#											entusiasmo																				0	0	Over 23
2021-03-29	tension#	tension																														0	0	Over 23
2021-04-06	tension#amor#valentia#	tension														amor	valentia															0	0	Over 23
2021-03-29	tension#ira#tristeza#frustracion#	tension						tristeza												frustracion									ira			0	0	Over 23
2021-05-04	agotamiento#																				agotamiento											0	0	Over 23
2021-05-04	agotamiento#																				agotamiento											0	0	Over 23
2021-05-29	calma#alegria#			alegria									calma																			0	0	Over 23
2021-05-04	calma#diversion#agrado#alegria#			alegria									calma					diversion				agrado										0	0	Over 23
2021-05-01	diversion#fortaleza#entusiasmo#									fortaleza		entusiasmo						diversion														0	0	Over 23
2021-05-04	tension#duda#agrado#amor#valentia#	tension												duda		amor	valentia					agrado										0	0	Over 23
2021-04-07	calma#tension#duda#agrado#alegria#valentia#fortaleza#entusiasmo#	tension		alegria						fortaleza		entusiasmo	calma	duda			valentia					agrado										0	0	Over 23
2021-04-06	diversion#alegria#valentia#fortaleza#entusiasmo#			alegria						fortaleza		entusiasmo					valentia	diversion														0	0	Over 23
2021-04-06	duda#agrado#valentia#													duda			valentia					agrado										0	0	Over 23
2021-04-06	duda#malestar#frustracion#apatia#						malestar				apatia			duda						frustracion												0	0	Over 23
2021-04-06	tension#alegria#valentia#agotamiento#	tension		alegria													valentia				agotamiento											0	0	Over 23
2021-04-06	tension#duda#aburrimiento#alegria#deseo#amor#miedo#agotamiento#	tension	aburrimiento	alegria	deseo									duda		amor					agotamiento						miedo					0	0	Over 23
2021-04-06	tension#duda#alegria#valentia#entusiasmo#	tension		alegria								entusiasmo		duda			valentia															0	0	Over 23
2021-04-06	tension#duda#amor#	tension												duda		amor																0	0	Over 23
2021-04-06	tension#duda#frustracion#agotamiento#	tension												duda						frustracion	agotamiento											0	0	Over 23
2021-04-06	tension#duda#ira#aburrimiento#malestar#tristeza#dolor#frustracion#deseo#amor#miedo#agotamiento#entusiasmo#humillacion#	tension	aburrimiento		deseo	humillacion	malestar	tristeza				entusiasmo		duda		amor			dolor	frustracion	agotamiento						miedo		ira			0	0	Over 23
2021-04-06	tension#frustracion#agotamiento#	tension																		frustracion	agotamiento											0	0	Over 23
2021-04-06	tension#duda#tristeza#frustracion#agotamiento#	tension						tristeza						duda						frustracion	agotamiento											0	0	Over 23
2021-04-06	tristeza#arrogancia#							tristeza																				arrogancia				0	0	Over 23
2021-04-29	calma#agrado#alegria#satisfaccion#amor#valentia#fortaleza#			alegria						fortaleza			calma			amor	valentia					agrado			satisfaccion							0	0	Over 23
2021-04-29	tension#dolor#miedo#	tension																	dolor								miedo					0	0	Over 23
2021-03-29	agrado#																					agrado										0	0	Over 23
2021-03-29	amor#miedo#entusiasmo#											entusiasmo				amor											miedo					0	0	Over 23
2021-03-29	calma#												calma																			0	0	Over 23
2021-04-06	calma#agrado#agotamiento#												calma								agotamiento	agrado										0	0	Over 23
2021-04-06	calma#alegria#satisfaccion#			alegria									calma												satisfaccion							0	0	Over 23
2021-04-06	calma#malestar#deseo#entusiasmo#				deseo		malestar					entusiasmo	calma																			0	0	Over 23
2021-03-29	duda#malestar#agotamiento#						malestar							duda							agotamiento											0	0	Over 23
2021-03-29	entusiasmo#											entusiasmo																				0	0	Over 23
2021-03-29	frustracion#																			frustracion												0	0	Over 23
2021-03-29	tension#	tension																														0	0	Over 23
2021-04-06	tension#alegria#satisfaccion#deseo#	tension		alegria	deseo																				satisfaccion							0	0	Over 23
2021-04-06	tension#duda#malestar#tristeza#frustracion#miedo#agotamiento#apatia#humillacion#	tension				humillacion	malestar	tristeza			apatia			duda						frustracion	agotamiento						miedo					0	0	Over 23
2021-04-06	tension#malestar#frustracion#agotamiento#	tension					malestar													frustracion	agotamiento											0	0	Over 23
2021-04-06	duda#													duda																		0	0	Over 23
2021-03-29	fortaleza#									fortaleza																						0	0	Over 23
2021-04-30	calma#certeza#compasion#amor#valentia#fortaleza#								certeza	fortaleza			calma			amor	valentia							compasion								0	0	Over 23
2021-05-04	calma#diversion#alegria#satisfaccion#			alegria									calma					diversion							satisfaccion							0	0	Over 23
2021-04-29	compasion#tristeza#dolor#amor#miedo#							tristeza								amor			dolor					compasion			miedo					0	0	Over 23
2021-04-29	duda#frustracion#miedo#													duda						frustracion							miedo					0	0	Over 23
2021-04-29	tension#duda#compasion#aburrimiento#malestar#alegria#placer#satisfaccion#deseo#amor#miedo#agotamiento#entusiasmo#humillacion#apego#	tension	aburrimiento	alegria	deseo	humillacion	malestar					entusiasmo		duda	placer	amor					agotamiento			compasion	satisfaccion	apego	miedo					0	0	Over 23
2021-04-29	tension#duda#compasion#tristeza#dolor#miedo#fortaleza#apatia#	tension						tristeza		fortaleza	apatia			duda					dolor					compasion			miedo					0	0	Over 23
2021-03-29	agotamiento#																				agotamiento											0	0	Over 23
2021-03-29	calma#agrado#satisfaccion#entusiasmo#											entusiasmo	calma									agrado			satisfaccion							0	0	Over 23
2021-03-29	satisfaccion#																								satisfaccion							0	0	Over 23
2021-03-29	tension#	tension																														0	0	Over 23
2021-04-06	tension#agrado#entusiasmo#	tension										entusiasmo										agrado										0	0	Over 23
2021-04-06	tension#agrado#frustracion#agotamiento#	tension																		frustracion	agotamiento	agrado										0	0	Over 23
2021-03-29	tension#miedo#	tension																									miedo					0	0	Over 23
2021-05-04	calma#diversion#alegria#amor#valentia#			alegria									calma			amor	valentia	diversion														0	0	Over 23
2021-04-29	duda#amor#miedo#entusiasmo#dependenciaEmocional#											entusiasmo		duda		amor							dependenciaEmocional				miedo					0	0	Over 23
2021-05-04	tension#ira#frustracion#odio#	tension																		frustracion									ira		odio	0	0	Over 23
2021-05-04	tension#ira#odio#agotamiento#	tension																			agotamiento								ira		odio	0	0	Over 23
2021-03-29	agotamiento#																				agotamiento											0	0	Over 23
2021-03-29	alegria#			alegria																												0	0	Over 23
2021-03-29	calma#												calma																			0	0	Over 23
2021-03-29	calma#tension#duda#compasion#diversion#aburrimiento#alegria#tristeza#satisfaccion#fobia#valentia#miedo#fortaleza#agotamiento#apatia#humillacion#	tension	aburrimiento	alegria		humillacion		tristeza		fortaleza	apatia		calma	duda			valentia	diversion			agotamiento			compasion	satisfaccion		miedo			fobia		0	0	Over 23
2021-03-29	tension#duda#agrado#amor#	tension												duda		amor						agrado										0	0	Over 23
2021-03-29	tension#duda#malestar#dolor#	tension					malestar							duda					dolor													0	0	Over 23
2021-03-29	tension#ira#tristeza#dolor#miedo#	tension						tristeza											dolor								miedo		ira			0	0	Over 23
2021-03-29	tristeza#							tristeza																								0	0	Over 23
2021-03-29	tristeza#							tristeza																								0	0	Over 23
2021-05-04	agrado#alegria#			alegria																		agrado										0	0	Over 23
2021-05-04	calma#												calma																			0	0	Over 23
2021-05-04	calma#agrado#												calma									agrado										0	0	Over 23
2021-04-29	calma#agrado#placer#												calma		placer							agrado										0	0	Over 23
2021-05-04	calma#agrado#valentia#fortaleza#									fortaleza			calma				valentia					agrado										0	0	Over 23
2021-04-29	calma#amor#apego#												calma			amor										apego						0	0	Over 23
2021-05-04	calma#deseo#				deseo								calma																			0	0	Over 23
2021-05-04	tension#certeza#duda#diversion#malestar#alegria#placer#satisfaccion#deseo#miedo#fortaleza#entusiasmo#apatia#humillacion#apego#	tension		alegria	deseo	humillacion	malestar		certeza	fortaleza	apatia	entusiasmo		duda	placer			diversion							satisfaccion	apego	miedo					0	0	Over 23
2021-05-04	tension#duda#	tension												duda																		0	0	Over 23
2021-05-04	tension#duda#alegria#entusiasmo#	tension		alegria								entusiasmo		duda																		0	0	Over 23
2021-04-29	tension#duda#compasion#diversion#agrado#tristeza#dolor#frustracion#fobia#amor#miedo#agotamiento#entusiasmo#arrogancia#dependenciaEmocional#	tension						tristeza				entusiasmo		duda		amor		diversion	dolor	frustracion	agotamiento	agrado	dependenciaEmocional	compasion			miedo	arrogancia		fobia		0	0	Over 23
2021-04-29	tension#duda#diversion#alegria#satisfaccion#amor#entusiasmo#apego#	tension		alegria								entusiasmo		duda		amor		diversion							satisfaccion	apego						0	0	Over 23
2021-04-29	tension#duda#tristeza#frustracion#miedo#agotamiento#	tension						tristeza						duda						frustracion	agotamiento						miedo					0	0	Over 23
2021-03-29	aburrimiento#		aburrimiento																													0	0	Over 23
2021-03-29	agrado#																					agrado										0	0	Over 23
2021-03-29	alegria#			alegria																												0	0	Over 23
2021-03-29	alegria#			alegria																												0	0	Over 23
2021-03-29	calma#												calma																			0	0	Over 23
2021-03-29	calma#certeza#compasion#diversion#agrado#alegria#placer#satisfaccion#deseo#amor#valentia#agotamiento#entusiasmo#			alegria	deseo				certeza			entusiasmo	calma		placer	amor	valentia	diversion			agotamiento	agrado		compasion	satisfaccion							0	0	Over 23
2021-03-29	tension#	tension																														0	0	Over 23
2021-03-29	tension#alegria#agotamiento#entusiasmo#	tension		alegria								entusiasmo									agotamiento											0	0	Over 23
2021-03-29	tension#alegria#satisfaccion#entusiasmo#	tension		alegria								entusiasmo													satisfaccion							0	0	Over 23
2021-03-29	tension#duda#fortaleza#	tension								fortaleza				duda																		0	0	Over 23
2021-04-29	tristeza#frustracion#							tristeza												frustracion												0	0	Over 23
2021-04-29	alegria#dolor#agotamiento#			alegria															dolor		agotamiento											0	0	Over 23
2021-05-04	calma#												calma																			0	0	Over 23
2021-04-29	calma#agrado#agotamiento#												calma								agotamiento	agrado										0	0	Over 23
2021-05-04	calma#agrado#agotamiento#												calma								agotamiento	agrado										0	0	Over 23
2021-04-29	calma#agrado#alegria#satisfaccion#agotamiento#			alegria									calma								agotamiento	agrado			satisfaccion							0	0	Over 23
2021-04-29	calma#agrado#amor#												calma			amor						agrado										0	0	Over 23
2021-04-29	calma#agrado#valentia#agotamiento#entusiasmo#											entusiasmo	calma				valentia				agotamiento	agrado										0	0	Over 23
2021-04-29	calma#alegria#agotamiento#			alegria									calma								agotamiento											0	0	Over 23
2021-05-04	calma#alegria#miedo#			alegria									calma														miedo					0	0	Over 23
2021-05-04	calma#amor#miedo#agotamiento#												calma			amor					agotamiento						miedo					0	0	Over 23
2021-05-04	calma#certeza#compasion#diversion#agrado#alegria#placer#satisfaccion#deseo#amor#miedo#fortaleza#entusiasmo#arrogancia#apego#			alegria	deseo				certeza	fortaleza		entusiasmo	calma		placer	amor		diversion				agrado		compasion	satisfaccion	apego	miedo	arrogancia				0	0	Over 23
2021-05-04	calma#certeza#compasion#diversion#agrado#alegria#placer#satisfaccion#deseo#amor#valentia#agotamiento#entusiasmo#arrogancia#apego#			alegria	deseo				certeza			entusiasmo	calma		placer	amor	valentia	diversion			agotamiento	agrado		compasion	satisfaccion	apego		arrogancia				0	0	Over 23
2021-04-29	calma#certeza#compasion#diversion#alegria#placer#satisfaccion#deseo#amor#fortaleza#entusiasmo#dependenciaEmocional#			alegria	deseo				certeza	fortaleza		entusiasmo	calma		placer	amor		diversion					dependenciaEmocional	compasion	satisfaccion							0	0	Over 23
2021-04-29	calma#certeza#compasion#diversion#alegria#placer#satisfaccion#deseo#amor#fortaleza#entusiasmo#dependenciaEmocional#			alegria	deseo				certeza	fortaleza		entusiasmo	calma		placer	amor		diversion					dependenciaEmocional	compasion	satisfaccion							0	0	Over 23
2021-04-29	calma#certeza#compasion#diversion#alegria#placer#satisfaccion#deseo#amor#fortaleza#entusiasmo#dependenciaEmocional#			alegria	deseo				certeza	fortaleza		entusiasmo	calma		placer	amor		diversion					dependenciaEmocional	compasion	satisfaccion							0	0	Over 23
2021-05-04	calma#certeza#compasion#diversion#alegria#valentia#fortaleza#entusiasmo#			alegria					certeza	fortaleza		entusiasmo	calma				valentia	diversion						compasion								0	0	Over 23
2021-04-29	calma#duda#agrado#alegria#placer#amor#agotamiento#			alegria									calma	duda	placer	amor					agotamiento	agrado										0	0	Over 23
2021-04-29	calma#duda#agrado#satisfaccion#valentia#entusiasmo#											entusiasmo	calma	duda			valentia					agrado			satisfaccion							0	0	Over 23
2021-04-29	calma#duda#amor#valentia#agotamiento#apego#												calma	duda		amor	valentia				agotamiento					apego						0	0	Over 23
2021-05-04	calma#duda#compasion#agrado#alegria#satisfaccion#amor#odio#agotamiento#apatia#			alegria							apatia		calma	duda		amor					agotamiento	agrado		compasion	satisfaccion						odio	0	0	Over 23
2021-05-04	calma#duda#compasion#amor#miedo#												calma	duda		amor								compasion			miedo					0	0	Over 23
2021-05-04	calma#duda#compasion#diversion#agrado#alegria#placer#satisfaccion#deseo#amor#miedo#entusiasmo#arrogancia#apego#			alegria	deseo							entusiasmo	calma	duda	placer	amor		diversion				agrado		compasion	satisfaccion	apego	miedo	arrogancia				0	0	Over 23
2021-05-04	calma#duda#compasion#diversion#agrado#alegria#placer#satisfaccion#deseo#amor#valentia#agotamiento#apatia#arrogancia#apego#			alegria	deseo						apatia		calma	duda	placer	amor	valentia	diversion			agotamiento	agrado		compasion	satisfaccion	apego		arrogancia				0	0	Over 23
2021-04-29	calma#duda#diversion#alegria#tristeza#amor#fortaleza#			alegria				tristeza		fortaleza			calma	duda		amor		diversion														0	0	Over 23
2021-05-04	calma#duda#diversion#alegria#tristeza#satisfaccion#amor#miedo#agotamiento#entusiasmo#			alegria				tristeza				entusiasmo	calma	duda		amor		diversion			agotamiento				satisfaccion		miedo					0	0	Over 23
2021-04-29	calma#duda#malestar#tristeza#frustracion#agotamiento#apego#dependenciaEmocional#						malestar	tristeza					calma	duda						frustracion	agotamiento		dependenciaEmocional			apego						0	0	Over 23
2021-04-29	calma#duda#malestar#tristeza#frustracion#agotamiento#apego#dependenciaEmocional#						malestar	tristeza					calma	duda						frustracion	agotamiento		dependenciaEmocional			apego						0	0	Over 23
2021-04-29	calma#duda#malestar#tristeza#frustracion#agotamiento#apego#dependenciaEmocional#						malestar	tristeza					calma	duda						frustracion	agotamiento		dependenciaEmocional			apego						0	0	Over 23
2021-04-29	calma#duda#malestar#tristeza#frustracion#agotamiento#apego#dependenciaEmocional#						malestar	tristeza					calma	duda						frustracion	agotamiento		dependenciaEmocional			apego						0	0	Over 23
2021-04-29	calma#duda#placer#deseo#				deseo								calma	duda	placer																	0	0	Over 23
2021-04-29	calma#fortaleza#									fortaleza			calma																			0	0	Over 23
2021-05-04	calma#fortaleza#									fortaleza			calma																			0	0	Over 23
2021-04-29	calma#tension#aburrimiento#alegria#frustracion#	tension	aburrimiento	alegria									calma							frustracion												0	0	Over 23
2021-05-04	calma#tension#agrado#alegria#amor#agotamiento#	tension		alegria									calma			amor					agotamiento	agrado										0	0	Over 23
2021-04-29	calma#tension#duda#aburrimiento#	tension	aburrimiento										calma	duda																		0	0	Over 23
2021-05-04	calma#tension#duda#alegria#satisfaccion#frustracion#valentia#miedo#agotamiento#apatia#humillacion#	tension		alegria		humillacion					apatia		calma	duda			valentia			frustracion	agotamiento				satisfaccion		miedo					0	0	Over 23
2021-04-29	calma#tension#duda#compasion#diversion#agrado#alegria#placer#satisfaccion#deseo#amor#valentia#fortaleza#apatia#apego#	tension		alegria	deseo					fortaleza	apatia		calma	duda	placer	amor	valentia	diversion				agrado		compasion	satisfaccion	apego						0	0	Over 23
2021-04-29	calma#tension#ira#agotamiento#	tension											calma								agotamiento								ira			0	0	Over 23
2021-04-29	calma#valentia#fortaleza#									fortaleza			calma				valentia															0	0	Over 23
2021-05-04	certeza#duda#compasion#diversion#alegria#tristeza#			alegria				tristeza	certeza					duda				diversion						compasion								0	0	Over 23
2021-05-04	compasion#tristeza#amor#							tristeza								amor								compasion								0	0	Over 23
2021-05-05	diversion#amor#miedo#agotamiento#															amor		diversion			agotamiento						miedo					0	0	Over 23
2021-05-04	diversion#amor#miedo#agotamiento#humillacion#					humillacion										amor		diversion			agotamiento						miedo					0	0	Over 23
2021-05-05	diversion#miedo#																	diversion									miedo					0	0	Over 23
2021-05-04	duda#agotamiento#apatia#										apatia			duda							agotamiento											0	0	Over 23
2021-05-04	duda#agrado#amor#													duda		amor						agrado										0	0	Over 23
2021-04-29	duda#compasion#alegria#miedo#			alegria										duda										compasion			miedo					0	0	Over 23
2021-05-04	duda#compasion#malestar#tristeza#amor#agotamiento#apego#						malestar	tristeza						duda		amor					agotamiento			compasion		apego						0	0	Over 23
2021-05-04	fobia#odio#																													fobia	odio	0	0	Over 23
2021-04-29	miedo#fortaleza#									fortaleza																	miedo					0	0	Over 23
2021-04-29	tension#aburrimiento#alegria#frustracion#apatia#	tension	aburrimiento	alegria							apatia									frustracion												0	0	Over 23
2021-04-29	tension#aburrimiento#deseo#fortaleza#	tension	aburrimiento		deseo					fortaleza																						0	0	Over 23
2021-04-29	tension#aburrimiento#deseo#fortaleza#	tension	aburrimiento		deseo					fortaleza																						0	0	Over 23
2021-04-30	tension#aburrimiento#dolor#fortaleza#	tension	aburrimiento							fortaleza									dolor													0	0	Over 23
2021-04-29	tension#aburrimiento#malestar#frustracion#	tension	aburrimiento				malestar													frustracion												0	0	Over 23
2021-05-04	tension#agrado#agotamiento#	tension																			agotamiento	agrado										0	0	Over 23
2021-04-29	tension#alegria#amor#agotamiento#entusiasmo#	tension		alegria								entusiasmo				amor					agotamiento											0	0	Over 23
2021-04-29	tension#alegria#amor#agotamiento#entusiasmo#	tension		alegria								entusiasmo				amor					agotamiento											0	0	Over 23
2021-04-29	tension#alegria#frustracion#amor#	tension		alegria												amor				frustracion												0	0	Over 23
2021-04-29	tension#amor#odio#agotamiento#humillacion#apego#	tension				humillacion										amor					agotamiento					apego					odio	0	0	Over 23
2021-05-04	tension#compasion#malestar#tristeza#dolor#frustracion#amor#fortaleza#apego#	tension					malestar	tristeza		fortaleza						amor			dolor	frustracion				compasion		apego						0	0	Over 23
2021-05-04	tension#duda#compasion#deseo#apatia#	tension			deseo						apatia			duda										compasion								0	0	Over 23
2021-04-29	tension#duda#compasion#diversion#agrado#alegria#placer#satisfaccion#deseo#amor#valentia#fortaleza#entusiasmo#arrogancia#apego#	tension		alegria	deseo					fortaleza		entusiasmo		duda	placer	amor	valentia	diversion				agrado		compasion	satisfaccion	apego		arrogancia				0	0	Over 23
2021-04-29	tension#duda#compasion#diversion#alegria#tristeza#amor#agotamiento#	tension		alegria				tristeza						duda		amor		diversion			agotamiento			compasion								0	0	Over 23
2021-05-04	tension#duda#compasion#malestar#tristeza#amor#agotamiento#apego#	tension					malestar	tristeza						duda		amor					agotamiento			compasion		apego						0	0	Over 23
2021-05-04	tension#duda#compasion#malestar#tristeza#amor#agotamiento#apego#	tension					malestar	tristeza						duda		amor					agotamiento			compasion		apego						0	0	Over 23
2021-04-29	tension#duda#frustracion#amor#odio#agotamiento#apego#	tension												duda		amor				frustracion	agotamiento					apego					odio	0	0	Over 23
2021-04-29	tension#duda#ira#aburrimiento#malestar#tristeza#dolor#frustracion#deseo#amor#valentia#agotamiento#apatia#arrogancia#apego#	tension	aburrimiento		deseo		malestar	tristeza			apatia			duda		amor	valentia		dolor	frustracion	agotamiento					apego		arrogancia	ira			0	0	Over 23
2021-04-29	tension#duda#ira#diversion#agrado#tristeza#placer#satisfaccion#deseo#odio#miedo#agotamiento#apatia#arrogancia#dependenciaEmocional#	tension			deseo			tristeza			apatia			duda	placer			diversion			agotamiento	agrado	dependenciaEmocional		satisfaccion		miedo	arrogancia	ira		odio	0	0	Over 23
2021-04-29	tension#duda#ira#malestar#frustracion#deseo#amor#miedo#agotamiento#entusiasmo#	tension			deseo		malestar					entusiasmo		duda		amor				frustracion	agotamiento						miedo		ira			0	0	Over 23
2021-05-04	tension#duda#malestar#tristeza#frustracion#deseo#odio#agotamiento#apatia#dependenciaEmocional#	tension			deseo		malestar	tristeza			apatia			duda						frustracion	agotamiento		dependenciaEmocional								odio	0	0	Over 23
2021-05-04	tension#duda#malestar#tristeza#frustracion#miedo#apego#	tension					malestar	tristeza						duda						frustracion						apego	miedo					0	0	Over 23
2021-05-04	tension#satisfaccion#	tension																							satisfaccion							0	0	Over 23
2021-04-29	valentia#fortaleza#									fortaleza							valentia															0	0	Over 23
2021-03-29	aburrimiento#agotamiento#		aburrimiento																		agotamiento											0	0	Over 23
2021-03-29	agotamiento#																				agotamiento											0	0	Over 23
2021-03-29	agrado#alegria#			alegria																		agrado										0	0	Over 23
2021-03-29	alegria#			alegria																												0	0	Over 23
2021-03-29	alegria#			alegria																												0	0	Over 23
2021-03-29	amor#															amor																0	0	Over 23
2021-03-29	calma#												calma																			0	0	Over 23
2021-03-29	calma#												calma																			0	0	Over 23
2021-03-29	calma#aburrimiento#		aburrimiento										calma																			0	0	Over 23
2021-03-29	calma#agrado#amor#fortaleza#entusiasmo#									fortaleza		entusiasmo	calma			amor						agrado										0	0	Over 23
2021-03-29	calma#alegria#			alegria									calma																			0	0	Over 23
2021-03-29	calma#certeza#compasion#aburrimiento#malestar#alegria#placer#satisfaccion#amor#valentia#fortaleza#entusiasmo#		aburrimiento	alegria			malestar		certeza	fortaleza		entusiasmo	calma		placer	amor	valentia							compasion	satisfaccion							0	0	Over 23
2021-03-29	calma#tension#duda#alegria#entusiasmo#	tension		alegria								entusiasmo	calma	duda																		0	0	Over 23
2021-03-29	duda#													duda																		0	0	Over 23
2021-03-29	duda#agrado#alegria#frustracion#amor#miedo#agotamiento#			alegria										duda		amor				frustracion	agotamiento	agrado					miedo					0	0	Over 23
2021-03-29	frustracion#miedo#																			frustracion							miedo					0	0	Over 23
2021-03-29	satisfaccion#																								satisfaccion							0	0	Over 23
2021-03-29	tension#	tension																														0	0	Over 23
2021-03-29	tension#	tension																														0	0	Over 23
2021-03-29	tension#	tension																														0	0	Over 23
2021-03-29	tension#	tension																														0	0	Over 23
2021-03-29	tension#	tension																														0	0	Over 23
2021-03-29	tension#	tension																														0	0	Over 23
2021-03-29	tension#	tension																														0	0	Over 23
2021-03-29	tension#	tension																														0	0	Over 23
2021-03-29	tension#	tension																														0	0	Over 23
2021-03-29	tension#	tension																														0	0	Over 23
2021-03-29	tension#	tension																														0	0	Over 23
2021-03-29	tension#alegria#fortaleza#	tension		alegria						fortaleza																						0	0	Over 23
2021-03-29	tension#deseo#	tension			deseo																											0	0	Over 23
2021-03-29	tension#duda#agotamiento#	tension												duda							agotamiento											0	0	Over 23
2021-03-29	tension#duda#compasion#diversion#agrado#alegria#amor#agotamiento#entusiasmo#	tension		alegria								entusiasmo		duda		amor		diversion			agotamiento	agrado		compasion								0	0	Over 23
2021-03-29	tension#duda#diversion#agrado#alegria#fortaleza#agotamiento#	tension		alegria						fortaleza				duda				diversion			agotamiento	agrado										0	0	Over 23
2021-03-29	tension#duda#ira#aburrimiento#agrado#tristeza#dolor#frustracion#fobia#odio#miedo#agotamiento#entusiasmo#humillacion#	tension	aburrimiento			humillacion		tristeza				entusiasmo		duda					dolor	frustracion	agotamiento	agrado					miedo		ira	fobia	odio	0	0	Over 23
2021-03-29	tension#duda#malestar#alegria#frustracion#agotamiento#apatia#	tension		alegria			malestar				apatia			duda						frustracion	agotamiento											0	0	Over 23
2021-03-29	tension#duda#ira#tristeza#satisfaccion#	tension						tristeza						duda											satisfaccion				ira			0	0	Over 23
2021-05-04	calma#duda#compasion#diversion#agrado#malestar#tristeza#placer#frustracion#deseo#amor#miedo#agotamiento#apatia#humillacion#dependenciaEmocional#				deseo	humillacion	malestar	tristeza			apatia		calma	duda	placer	amor		diversion		frustracion	agotamiento	agrado	dependenciaEmocional	compasion			miedo					0	0	Over 23
2021-05-04	agrado#frustracion#																			frustracion		agrado										0	0	Over 23
2021-03-29	calma#tension#frustracion#deseo#	tension			deseo								calma							frustracion												0	0	Over 23
2021-03-29	alegria#tristeza#amor#entusiasmo#			alegria				tristeza				entusiasmo				amor																0	0	Over 23
2021-03-29	tension#tristeza#dolor#amor#	tension						tristeza								amor			dolor													0	0	Over 23
2021-03-29	alegria#			alegria																												0	0	Over 23
2021-03-29	diversion#alegria#satisfaccion#amor#			alegria												amor		diversion							satisfaccion							0	0	Over 23
2021-04-30	tension#ira#aburrimiento#tristeza#dolor#frustracion#fortaleza#	tension	aburrimiento					tristeza		fortaleza									dolor	frustracion									ira			0	0	Over 23
2021-03-29	tristeza#frustracion#fobia#odio#miedo#							tristeza												frustracion							miedo			fobia	odio	0	0	Over 23
2021-03-29	tristeza#							tristeza																								0	0	Over 23
2021-03-29	calma#certeza#diversion#agrado#satisfaccion#fortaleza#								certeza	fortaleza			calma					diversion				agrado			satisfaccion							0	0	Over 23
2021-03-29	tristeza#							tristeza																								0	0	Over 23
2021-04-26	calma#certeza#compasion#diversion#agrado#alegria#placer#satisfaccion#deseo#amor#valentia#fortaleza#entusiasmo#arrogancia#apego#			alegria	deseo				certeza	fortaleza		entusiasmo	calma		placer	amor	valentia	diversion				agrado		compasion	satisfaccion	apego		arrogancia				0	0	Over 23
2021-05-24	calma#entusiasmo#											entusiasmo	calma																			0	0	Over 23
2021-05-10	calma#satisfaccion#												calma												satisfaccion							0	0	Over 23
2021-06-07	miedo#																										miedo					0	0	Over 23
2021-05-04	tension#diversion#alegria#frustracion#miedo#agotamiento#entusiasmo#	tension		alegria								entusiasmo						diversion		frustracion	agotamiento						miedo					0	0	Over 23
2021-03-29	amor#															amor																0	0	Over 23
2021-03-29	amor#															amor																0	0	Over 23
2021-04-12	calma#duda#compasion#diversion#agrado#alegria#placer#satisfaccion#deseo#amor#valentia#fortaleza#entusiasmo#arrogancia#apego#			alegria	deseo					fortaleza		entusiasmo	calma	duda	placer	amor	valentia	diversion				agrado		compasion	satisfaccion	apego		arrogancia				0	0	Over 23
2021-05-10	certeza#duda#								certeza					duda																		0	0	Over 23
2021-04-12	calma#certeza#compasion#diversion#agrado#alegria#placer#satisfaccion#deseo#amor#valentia#fortaleza#entusiasmo#arrogancia#apego#			alegria	deseo				certeza	fortaleza		entusiasmo	calma		placer	amor	valentia	diversion				agrado		compasion	satisfaccion	apego		arrogancia				0	0	Over 23
2021-05-10	aburrimiento#		aburrimiento																													0	0	Over 23
2021-05-10	aburrimiento#		aburrimiento																													0	0	Over 23
2021-04-26	aburrimiento#apatia#		aburrimiento								apatia																					0	0	Over 23
2021-04-26	aburrimiento#malestar#apatia#		aburrimiento				malestar				apatia																					0	0	Over 23
2021-06-07	aburrimiento#malestar#tristeza#agotamiento#apatia#		aburrimiento				malestar	tristeza			apatia										agotamiento											0	0	Over 23
2021-06-07	agotamiento#																				agotamiento											0	0	Over 23
2021-06-07	agotamiento#																				agotamiento											0	0	Over 23
2021-05-10	agotamiento#																				agotamiento											0	0	Over 23
2021-05-10	agrado#																					agrado										0	0	Over 23
2021-05-24	agrado#alegria#satisfaccion#deseo#agotamiento#apego#			alegria	deseo																agotamiento	agrado			satisfaccion	apego						0	0	Over 23
2021-06-07	alegria#			alegria																												0	0	Over 23
2021-05-10	alegria#agotamiento#			alegria																	agotamiento											0	0	Over 23
2021-05-10	alegria#satisfaccion#deseo#amor#arrogancia#dependenciaEmocional#			alegria	deseo											amor							dependenciaEmocional		satisfaccion			arrogancia				0	0	Over 23
2021-06-07	calma#												calma																			0	0	Over 23
2021-06-07	calma#												calma																			0	0	Over 23
2021-05-24	calma#aburrimiento#deseo#		aburrimiento		deseo								calma																			0	0	Over 23
2021-05-24	calma#aburrimiento#malestar#dolor#agotamiento#		aburrimiento				malestar						calma						dolor		agotamiento											0	0	Over 23
2021-05-10	calma#agrado#agotamiento#												calma								agotamiento	agrado										0	0	Over 23
2021-05-24	calma#agrado#alegria#			alegria									calma									agrado										0	0	Over 23
2021-05-24	calma#agrado#frustracion#deseo#agotamiento#				deseo								calma							frustracion	agotamiento	agrado										0	0	Over 23
2021-06-07	calma#certeza#aburrimiento#agrado#alegria#placer#satisfaccion#valentia#fortaleza#entusiasmo#		aburrimiento	alegria					certeza	fortaleza		entusiasmo	calma		placer		valentia					agrado			satisfaccion							0	0	Over 23
2021-06-07	calma#certeza#agrado#alegria#placer#satisfaccion#valentia#fortaleza#entusiasmo#			alegria					certeza	fortaleza		entusiasmo	calma		placer		valentia					agrado			satisfaccion							0	0	Over 23
2021-04-26	calma#certeza#diversion#agrado#alegria#			alegria					certeza				calma					diversion				agrado										0	0	Over 23
2021-04-26	calma#certeza#diversion#agrado#alegria#satisfaccion#valentia#fortaleza#arrogancia#			alegria					certeza	fortaleza			calma				valentia	diversion				agrado			satisfaccion			arrogancia				0	0	Over 23
2021-05-24	calma#compasion#deseo#				deseo								calma											compasion								0	0	Over 23
2021-04-26	calma#diversion#												calma					diversion														0	0	Over 23
2021-05-10	calma#diversion#agrado#alegria#entusiasmo#			alegria								entusiasmo	calma					diversion				agrado										0	0	Over 23
2021-04-26	calma#diversion#alegria#			alegria									calma					diversion														0	0	Over 23
2021-04-26	calma#diversion#alegria#			alegria									calma					diversion														0	0	Over 23
2021-05-10	calma#diversion#alegria#satisfaccion#			alegria									calma					diversion							satisfaccion							0	0	Over 23
2021-05-24	calma#duda#												calma	duda																		0	0	Over 23
2021-05-10	calma#duda#aburrimiento#		aburrimiento										calma	duda																		0	0	Over 23
2021-04-26	calma#duda#aburrimiento#agotamiento#		aburrimiento										calma	duda							agotamiento											0	0	Over 23
2021-05-24	calma#duda#aburrimiento#malestar#alegria#frustracion#deseo#odio#agotamiento#		aburrimiento	alegria	deseo		malestar						calma	duda						frustracion	agotamiento										odio	0	0	Over 23
2021-05-24	calma#duda#compasion#aburrimiento#dolor#miedo#		aburrimiento										calma	duda					dolor					compasion			miedo					0	0	Over 23
2021-05-10	calma#duda#compasion#diversion#agrado#alegria#placer#satisfaccion#deseo#valentia#fortaleza#			alegria	deseo					fortaleza			calma	duda	placer		valentia	diversion				agrado		compasion	satisfaccion							0	0	Over 23
2021-05-24	calma#duda#compasion#diversion#agrado#alegria#placer#satisfaccion#fobia#amor#valentia#agotamiento#entusiasmo#humillacion#apego#			alegria		humillacion						entusiasmo	calma	duda	placer	amor	valentia	diversion			agotamiento	agrado		compasion	satisfaccion	apego				fobia		0	0	Over 23
2021-04-26	calma#duda#diversion#aburrimiento#agrado#alegria#agotamiento#		aburrimiento	alegria									calma	duda				diversion			agotamiento	agrado										0	0	Over 23
2021-04-26	calma#duda#diversion#alegria#			alegria									calma	duda				diversion														0	0	Over 23
2021-04-26	calma#duda#fortaleza#entusiasmo#									fortaleza		entusiasmo	calma	duda																		0	0	Over 23
2021-05-24	calma#duda#malestar#alegria#			alegria			malestar						calma	duda																		0	0	Over 23
2021-05-24	calma#ira#aburrimiento#agrado#odio#agotamiento#		aburrimiento										calma								agotamiento	agrado							ira		odio	0	0	Over 23
2021-05-24	calma#tension#duda#	tension											calma	duda																		0	0	Over 23
2021-06-07	compasion#diversion#agrado#alegria#			alegria														diversion				agrado		compasion								0	0	Over 23
2021-06-07	compasion#diversion#entusiasmo#											entusiasmo						diversion						compasion								0	0	Over 23
2021-06-07	diversion#																	diversion														0	0	Over 23
2021-06-07	diversion#																	diversion														0	0	Over 23
2021-06-07	duda#													duda																		0	0	Over 23
2021-06-07	duda#													duda																		0	0	Over 23
2021-05-24	duda#aburrimiento#		aburrimiento											duda																		0	0	Over 23
2021-05-10	duda#diversion#alegria#frustracion#			alegria										duda				diversion		frustracion												0	0	Over 23
2021-04-26	duda#frustracion#agotamiento#													duda						frustracion	agotamiento											0	0	Over 23
2021-05-10	duda#frustracion#miedo#agotamiento#													duda						frustracion	agotamiento						miedo					0	0	Over 23
2021-06-07	frustracion#																			frustracion												0	0	Over 23
2021-05-10	frustracion#																			frustracion												0	0	Over 23
2021-04-26	ira#aburrimiento#frustracion#amor#agotamiento#apatia#		aburrimiento								apatia					amor				frustracion	agotamiento								ira			0	0	Over 23
2021-06-07	ira#aburrimiento#tristeza#frustracion#miedo#agotamiento#apatia#		aburrimiento					tristeza			apatia									frustracion	agotamiento						miedo		ira			0	0	Over 23
2021-05-10	ira#dolor#frustracion#																		dolor	frustracion									ira			0	0	Over 23
2021-06-07	tension#aburrimiento#agotamiento#	tension	aburrimiento																		agotamiento											0	0	Over 23
2021-05-10	tension#certeza#compasion#aburrimiento#agrado#alegria#placer#satisfaccion#deseo#amor#valentia#agotamiento#entusiasmo#arrogancia#dependenciaEmocional#	tension	aburrimiento	alegria	deseo				certeza			entusiasmo			placer	amor	valentia				agotamiento	agrado	dependenciaEmocional	compasion	satisfaccion			arrogancia				0	0	Over 23
2021-04-26	tension#compasion#diversion#malestar#alegria#frustracion#	tension		alegria			malestar											diversion		frustracion				compasion								0	0	Over 23
2021-05-24	tension#duda#	tension												duda																		0	0	Over 23
2021-05-10	tension#duda#	tension												duda																		0	0	Over 23
2021-05-10	tension#duda#aburrimiento#frustracion#agotamiento#	tension	aburrimiento											duda						frustracion	agotamiento											0	0	Over 23
2021-04-26	tension#duda#aburrimiento#frustracion#amor#miedo#agotamiento#apatia#arrogancia#	tension	aburrimiento								apatia			duda		amor				frustracion	agotamiento						miedo	arrogancia				0	0	Over 23
2021-05-10	tension#duda#ira#diversion#agrado#malestar#alegria#placer#frustracion#deseo#amor#odio#miedo#agotamiento#	tension		alegria	deseo		malestar							duda	placer	amor		diversion		frustracion	agotamiento	agrado					miedo		ira		odio	0	0	Over 23
2021-04-26	tension#duda#malestar#	tension					malestar							duda																		0	0	Over 23
2021-05-24	tension#duda#miedo#	tension												duda													miedo					0	0	Over 23
2021-04-26	tension#ira#aburrimiento#frustracion#amor#agotamiento#arrogancia#	tension	aburrimiento													amor				frustracion	agotamiento							arrogancia	ira			0	0	Over 23
2021-05-24	tension#ira#malestar#frustracion#odio#fortaleza#	tension					malestar			fortaleza										frustracion									ira		odio	0	0	Over 23
2021-05-24	tension#ira#odio#	tension																											ira		odio	0	0	Over 23
2021-06-07	tension#malestar#frustracion#odio#agotamiento#	tension					malestar													frustracion	agotamiento										odio	0	0	Over 23
2021-04-12	aburrimiento#agrado#apatia#		aburrimiento								apatia											agrado										0	0	Over 23
2021-04-12	calma#aburrimiento#agrado#alegria#agotamiento#entusiasmo#		aburrimiento	alegria								entusiasmo	calma								agotamiento	agrado										0	0	Over 23
2021-04-12	calma#aburrimiento#malestar#agotamiento#		aburrimiento				malestar						calma								agotamiento											0	0	Over 23
2021-04-12	calma#agotamiento#												calma								agotamiento											0	0	Over 23
2021-04-12	calma#agrado#												calma									agrado										0	0	Over 23
2021-04-12	calma#agrado#												calma									agrado										0	0	Over 23
2021-04-12	calma#alegria#entusiasmo#			alegria								entusiasmo	calma																			0	0	Over 23
2021-04-12	calma#certeza#aburrimiento#agrado#alegria#placer#satisfaccion#deseo#amor#valentia#agotamiento#entusiasmo#humillacion#apego#		aburrimiento	alegria	deseo	humillacion			certeza			entusiasmo	calma		placer	amor	valentia				agotamiento	agrado			satisfaccion	apego						0	0	Over 23
2021-04-12	calma#certeza#diversion#agrado#alegria#placer#satisfaccion#valentia#fortaleza#			alegria					certeza	fortaleza			calma		placer		valentia	diversion				agrado			satisfaccion							0	0	Over 23
2021-04-12	calma#duda#compasion#aburrimiento#agrado#tristeza#agotamiento#arrogancia#		aburrimiento					tristeza					calma	duda							agotamiento	agrado		compasion				arrogancia				0	0	Over 23
2021-04-12	calma#duda#compasion#diversion#malestar#alegria#frustracion#deseo#odio#valentia#miedo#agotamiento#entusiasmo#dependenciaEmocional#			alegria	deseo		malestar					entusiasmo	calma	duda			valentia	diversion		frustracion	agotamiento		dependenciaEmocional	compasion			miedo				odio	0	0	Over 23
2021-04-12	certeza#diversion#agrado#alegria#entusiasmo#			alegria					certeza			entusiasmo						diversion				agrado										0	0	Over 23
2021-04-12	duda#aburrimiento#alegria#frustracion#amor#agotamiento#arrogancia#humillacion#		aburrimiento	alegria		humillacion								duda		amor				frustracion	agotamiento							arrogancia				0	0	Over 23
2021-04-12	duda#aburrimiento#frustracion#		aburrimiento											duda						frustracion												0	0	Over 23
2021-04-12	duda#aburrimiento#frustracion#fortaleza#		aburrimiento							fortaleza				duda						frustracion												0	0	Over 23
2021-04-12	tension#apatia#dependenciaEmocional#	tension									apatia												dependenciaEmocional									0	0	Over 23
2021-04-12	tension#duda#malestar#alegria#frustracion#agotamiento#apego#dependenciaEmocional#	tension		alegria			malestar							duda						frustracion	agotamiento		dependenciaEmocional			apego						0	0	Over 23
2021-04-26	alegria#			alegria																												0	0	Over 23
2021-06-07	calma#alegria#satisfaccion#			alegria									calma												satisfaccion							0	0	Over 23
2021-06-07	calma#												calma																			0	0	Over 23
2021-05-24	tension#malestar#agotamiento#	tension					malestar														agotamiento											0	0	Over 23
2021-05-24	duda#tristeza#							tristeza						duda																		0	0	Over 23
2021-05-10	alegria#frustracion#			alegria																frustracion												0	0	Over 23
2021-06-07	calma#tension#certeza#duda#compasion#ira#diversion#aburrimiento#agrado#malestar#alegria#tristeza#placer#dolor#satisfaccion#frustracion#deseo#fobia#amor#odio#valentia#miedo#fortaleza#agotamiento#entusiasmo#apatia#arrogancia#humillacion#apego#dependenciaEmocional#	tension	aburrimiento	alegria	deseo	humillacion	malestar	tristeza	certeza	fortaleza	apatia	entusiasmo	calma	duda	placer	amor	valentia	diversion	dolor	frustracion	agotamiento	agrado	dependenciaEmocional	compasion	satisfaccion	apego	miedo	arrogancia	ira	fobia	odio	0	0	Over 23
2021-06-07	calma#tension#certeza#duda#compasion#ira#diversion#aburrimiento#agrado#malestar#alegria#tristeza#placer#dolor#satisfaccion#frustracion#deseo#fobia#amor#odio#valentia#miedo#fortaleza#agotamiento#entusiasmo#apatia#arrogancia#humillacion#apego#dependenciaEmocional#	tension	aburrimiento	alegria	deseo	humillacion	malestar	tristeza	certeza	fortaleza	apatia	entusiasmo	calma	duda	placer	amor	valentia	diversion	dolor	frustracion	agotamiento	agrado	dependenciaEmocional	compasion	satisfaccion	apego	miedo	arrogancia	ira	fobia	odio	0	0	Over 23
2021-06-07	alegria#			alegria																												0	0	Over 23
2021-06-07	malestar#tristeza#apatia#						malestar	tristeza			apatia																					0	0	Over 23
2021-06-07	malestar#tristeza#dolor#agotamiento#apatia#						malestar	tristeza			apatia								dolor		agotamiento											0	0	Over 23
2021-06-07	tension#aburrimiento#	tension	aburrimiento																													0	0	Over 23
2021-05-24	agrado#alegria#valentia#			alegria													valentia					agrado										0	0	Over 23
2021-06-07	malestar#frustracion#						malestar													frustracion												0	0	Over 23
2021-06-07	aburrimiento#agrado#		aburrimiento																			agrado										0	0	Over 23
2021-06-07	calma#duda#												calma	duda																		0	0	Over 23
2021-06-07	compasion#																							compasion								0	0	Over 23
2021-06-07	certeza#alegria#			alegria					certeza																							0	0	Over 23
2021-05-10	ira#frustracion#																			frustracion									ira			0	0	Over 23
2021-05-10	ira#frustracion#																			frustracion									ira			0	0	Over 23
2021-06-07	certeza#aburrimiento#tristeza#agotamiento#		aburrimiento					tristeza	certeza												agotamiento											0	0	Over 23
2021-05-10	ira#malestar#						malestar																						ira			0	0	Over 23
2021-05-10	certeza#								certeza																							0	0	Over 23
2021-05-24	tension#malestar#	tension					malestar																									0	0	Over 23
2021-05-10	tristeza#frustracion#							tristeza												frustracion												0	0	Over 23
2021-05-10	miedo#																										miedo					0	0	Over 23
2021-04-26	aburrimiento#malestar#miedo#agotamiento#arrogancia#		aburrimiento				malestar														agotamiento						miedo	arrogancia				0	0	Over 23
2021-04-12	aburrimiento#malestar#tristeza#frustracion#fortaleza#		aburrimiento				malestar	tristeza		fortaleza										frustracion												0	0	Over 23
2021-05-10	agrado#																					agrado										0	0	Over 23
2021-04-26	duda#miedo#													duda													miedo					0	0	Over 23
2021-05-24	calma#tension#	tension											calma																			0	0	Over 23
2021-05-24	tension#malestar#	tension					malestar																									0	0	Over 23
2021-05-10	certeza#aburrimiento#tristeza#		aburrimiento					tristeza	certeza																							0	0	Over 23
2021-06-07	compasion#diversion#agrado#alegria#			alegria														diversion				agrado		compasion								0	0	Over 23
2021-05-24	tension#dolor#frustracion#agotamiento#	tension																	dolor	frustracion	agotamiento											0	0	Over 23
2021-05-24	tristeza#frustracion#							tristeza												frustracion												0	0	Over 23
2021-04-26	calma#duda#fortaleza#entusiasmo#									fortaleza		entusiasmo	calma	duda																		0	0	Over 23
2021-06-07	agotamiento#																				agotamiento											0	0	Over 23
2021-06-07	agotamiento#																				agotamiento											0	0	Over 23
2021-05-24	duda#ira#aburrimiento#agotamiento#		aburrimiento											duda							agotamiento								ira			0	0	Over 23
2021-05-24	amor#entusiasmo#											entusiasmo				amor																0	0	Over 23
2021-05-24	calma#certeza#alegria#			alegria					certeza				calma																			0	0	Over 23
2021-05-24	duda#aburrimiento#alegria#tristeza#		aburrimiento	alegria				tristeza						duda																		0	0	Over 23
2021-05-10	calma#diversion#agrado#alegria#placer#satisfaccion#entusiasmo#			alegria								entusiasmo	calma		placer			diversion				agrado			satisfaccion							0	0	Over 23
2021-04-26	alegria#			alegria																												0	0	Over 23
2021-04-26	alegria#			alegria																												0	0	Over 23
2021-04-26	alegria#			alegria																												0	0	Over 23
2021-05-10	calma#agrado#entusiasmo#											entusiasmo	calma									agrado										0	0	Over 23
2021-05-10	ira#dolor#																		dolor										ira			0	0	Over 23
2021-05-10	calma#alegria#			alegria									calma																			0	0	Over 23
2021-04-12	aburrimiento#alegria#agotamiento#		aburrimiento	alegria																	agotamiento											0	0	Over 23
2021-05-24	calma#duda#miedo#												calma	duda													miedo					0	0	Over 23
2021-04-12	calma#aburrimiento#		aburrimiento										calma																			0	0	Over 23
2021-05-10	agotamiento#arrogancia#																				agotamiento							arrogancia				0	0	Over 23
2021-05-10	tension#ira#frustracion#odio#miedo#	tension																		frustracion							miedo		ira		odio	0	0	Over 23
2021-06-07	agrado#tristeza#							tristeza														agrado										0	0	Over 23
2021-05-24	aburrimiento#		aburrimiento																													0	0	Over 23
2021-05-10	aburrimiento#		aburrimiento																													0	0	Over 23
2021-05-10	aburrimiento#		aburrimiento																													0	0	Over 23
2021-05-10	aburrimiento#agrado#		aburrimiento																			agrado										0	0	Over 23
2021-05-10	aburrimiento#alegria#agotamiento#		aburrimiento	alegria																	agotamiento											0	0	Over 23
2021-05-24	aburrimiento#tristeza#deseo#		aburrimiento		deseo			tristeza																								0	0	Over 23
2021-05-24	aburrimiento#tristeza#deseo#miedo#		aburrimiento		deseo			tristeza																			miedo					0	0	Over 23
2021-05-24	aburrimiento#tristeza#deseo#odio#		aburrimiento		deseo			tristeza																							odio	0	0	Over 23
2021-05-24	agotamiento#																				agotamiento											0	0	Over 23
2021-05-24	agrado#																					agrado										0	0	Over 23
2021-06-07	agrado#																					agrado										0	0	Over 23
2021-06-07	agrado#																					agrado										0	0	Over 23
2021-05-24	agrado#																					agrado										0	0	Over 23
2021-06-07	agrado#alegria#deseo#agotamiento#			alegria	deseo																agotamiento	agrado										0	0	Over 23
2021-04-26	agrado#placer#amor#														placer	amor						agrado										0	0	Over 23
2021-04-26	agrado#placer#amor#fortaleza#apego#									fortaleza					placer	amor						agrado				apego						0	0	Over 23
2021-06-07	agrado#tristeza#deseo#				deseo			tristeza														agrado										0	0	Over 23
2021-05-10	alegria#miedo#			alegria																							miedo					0	0	Over 23
2021-05-10	alegria#miedo#			alegria																							miedo					0	0	Over 23
2021-04-26	amor#valentia#fortaleza#									fortaleza						amor	valentia															0	0	Over 23
2021-04-26	calma#												calma																			0	0	Over 23
2021-04-26	calma#												calma																			0	0	Over 23
2021-05-10	calma#												calma																			0	0	Over 23
2021-05-10	calma#												calma																			0	0	Over 23
2021-05-10	calma#												calma																			0	0	Over 23
2021-06-07	calma#												calma																			0	0	Over 23
2021-06-07	calma#												calma																			0	0	Over 23
2021-04-26	calma#aburrimiento#		aburrimiento										calma																			0	0	Over 23
2021-04-26	calma#aburrimiento#agrado#		aburrimiento										calma									agrado										0	0	Over 23
2021-05-24	calma#aburrimiento#agrado#		aburrimiento										calma									agrado										0	0	Over 23
2021-04-26	calma#aburrimiento#agrado#alegria#fortaleza#		aburrimiento	alegria						fortaleza			calma									agrado										0	0	Over 23
2021-05-10	calma#aburrimiento#agrado#tristeza#amor#		aburrimiento					tristeza					calma			amor						agrado										0	0	Over 23
2021-04-26	calma#aburrimiento#alegria#		aburrimiento	alegria									calma																			0	0	Over 23
2021-06-07	calma#aburrimiento#alegria#agotamiento#		aburrimiento	alegria									calma								agotamiento											0	0	Over 23
2021-04-26	calma#aburrimiento#apatia#		aburrimiento								apatia		calma																			0	0	Over 23
2021-05-24	calma#aburrimiento#apatia#		aburrimiento								apatia		calma																			0	0	Over 23
2021-05-10	calma#aburrimiento#placer#fortaleza#		aburrimiento							fortaleza			calma		placer																	0	0	Over 23
2021-06-07	calma#agotamiento#apatia#										apatia		calma								agotamiento											0	0	Over 23
2021-05-10	calma#agrado#												calma									agrado										0	0	Over 23
2021-05-10	calma#agrado#												calma									agrado										0	0	Over 23
2021-05-10	calma#agrado#												calma									agrado										0	0	Over 23
2021-05-10	calma#agrado#												calma									agrado										0	0	Over 23
2021-05-10	calma#agrado#alegria#			alegria									calma									agrado										0	0	Over 23
2021-04-26	calma#alegria#amor#			alegria									calma			amor																0	0	Over 23
2021-05-24	calma#alegria#placer#amor#			alegria									calma		placer	amor																0	0	Over 23
2021-06-07	calma#apatia#										apatia		calma																			0	0	Over 23
2021-05-10	calma#certeza#alegria#dolor#frustracion#amor#arrogancia#			alegria					certeza				calma			amor			dolor	frustracion								arrogancia				0	0	Over 23
2021-04-26	calma#certeza#compasion#aburrimiento#agrado#alegria#placer#satisfaccion#deseo#amor#valentia#fortaleza#entusiasmo#arrogancia#apego#		aburrimiento	alegria	deseo				certeza	fortaleza		entusiasmo	calma		placer	amor	valentia					agrado		compasion	satisfaccion	apego		arrogancia				0	0	Over 23
2021-05-24	calma#certeza#compasion#aburrimiento#alegria#placer#satisfaccion#deseo#		aburrimiento	alegria	deseo				certeza				calma		placer									compasion	satisfaccion							0	0	Over 23
2021-05-10	calma#certeza#compasion#diversion#agrado#alegria#placer#satisfaccion#deseo#amor#valentia#fortaleza#entusiasmo#arrogancia#apego#			alegria	deseo				certeza	fortaleza		entusiasmo	calma		placer	amor	valentia	diversion				agrado		compasion	satisfaccion	apego		arrogancia				0	0	Over 23
2021-04-26	calma#certeza#compasion#diversion#agrado#alegria#placer#satisfaccion#deseo#amor#valentia#fortaleza#entusiasmo#arrogancia#apego#			alegria	deseo				certeza	fortaleza		entusiasmo	calma		placer	amor	valentia	diversion				agrado		compasion	satisfaccion	apego		arrogancia				0	0	Over 23
2021-04-26	calma#certeza#compasion#diversion#agrado#alegria#satisfaccion#			alegria					certeza				calma					diversion				agrado		compasion	satisfaccion							0	0	Over 23
2021-05-24	calma#certeza#duda#compasion#diversion#agrado#alegria#placer#dolor#satisfaccion#deseo#amor#valentia#fortaleza#entusiasmo#arrogancia#dependenciaEmocional#			alegria	deseo				certeza	fortaleza		entusiasmo	calma	duda	placer	amor	valentia	diversion	dolor			agrado	dependenciaEmocional	compasion	satisfaccion			arrogancia				0	0	Over 23
2021-05-24	calma#certeza#duda#compasion#diversion#agrado#alegria#placer#dolor#satisfaccion#frustracion#deseo#amor#valentia#fortaleza#entusiasmo#arrogancia#dependenciaEmocional#			alegria	deseo				certeza	fortaleza		entusiasmo	calma	duda	placer	amor	valentia	diversion	dolor	frustracion		agrado	dependenciaEmocional	compasion	satisfaccion			arrogancia				0	0	Over 23
2021-05-24	calma#certeza#duda#compasion#diversion#agrado#alegria#placer#satisfaccion#deseo#amor#valentia#fortaleza#entusiasmo#arrogancia#dependenciaEmocional#			alegria	deseo				certeza	fortaleza		entusiasmo	calma	duda	placer	amor	valentia	diversion				agrado	dependenciaEmocional	compasion	satisfaccion			arrogancia				0	0	Over 23
2021-06-07	calma#certeza#duda#compasion#diversion#agrado#alegria#placer#satisfaccion#deseo#amor#valentia#fortaleza#entusiasmo#arrogancia#dependenciaEmocional#			alegria	deseo				certeza	fortaleza		entusiasmo	calma	duda	placer	amor	valentia	diversion				agrado	dependenciaEmocional	compasion	satisfaccion			arrogancia				0	0	Over 23
2021-06-07	calma#certeza#duda#compasion#diversion#agrado#malestar#alegria#placer#satisfaccion#deseo#amor#valentia#fortaleza#entusiasmo#arrogancia#dependenciaEmocional#			alegria	deseo		malestar		certeza	fortaleza		entusiasmo	calma	duda	placer	amor	valentia	diversion				agrado	dependenciaEmocional	compasion	satisfaccion			arrogancia				0	0	Over 23
2021-06-07	calma#certeza#duda#compasion#diversion#agrado#malestar#alegria#placer#satisfaccion#deseo#amor#valentia#fortaleza#entusiasmo#arrogancia#dependenciaEmocional#			alegria	deseo		malestar		certeza	fortaleza		entusiasmo	calma	duda	placer	amor	valentia	diversion				agrado	dependenciaEmocional	compasion	satisfaccion			arrogancia				0	0	Over 23
2021-05-10	calma#certeza#ira#aburrimiento#agrado#alegria#placer#satisfaccion#deseo#fobia#amor#valentia#fortaleza#entusiasmo#humillacion#dependenciaEmocional#		aburrimiento	alegria	deseo	humillacion			certeza	fortaleza		entusiasmo	calma		placer	amor	valentia					agrado	dependenciaEmocional		satisfaccion				ira	fobia		0	0	Over 23
2021-04-26	calma#compasion#alegria#			alegria									calma											compasion								0	0	Over 23
2021-05-24	calma#diversion#aburrimiento#agotamiento#		aburrimiento										calma					diversion			agotamiento											0	0	Over 23
2021-05-24	calma#diversion#agrado#												calma					diversion				agrado										0	0	Over 23
2021-06-07	calma#diversion#agrado#amor#apatia#										apatia		calma			amor		diversion				agrado										0	0	Over 23
2021-05-24	calma#diversion#alegria#entusiasmo#			alegria								entusiasmo	calma					diversion														0	0	Over 23
2021-05-24	calma#diversion#alegria#placer#satisfaccion#entusiasmo#			alegria								entusiasmo	calma		placer			diversion							satisfaccion							0	0	Over 23
2021-05-24	calma#duda#agrado#alegria#deseo#agotamiento#entusiasmo#			alegria	deseo							entusiasmo	calma	duda							agotamiento	agrado										0	0	Over 23
2021-05-24	calma#duda#alegria#			alegria									calma	duda																		0	0	Over 23
2021-04-26	calma#duda#compasion#aburrimiento#malestar#alegria#placer#satisfaccion#valentia#fortaleza#entusiasmo#apego#		aburrimiento	alegria			malestar			fortaleza		entusiasmo	calma	duda	placer		valentia							compasion	satisfaccion	apego						0	0	Over 23
2021-04-26	calma#duda#compasion#aburrimiento#malestar#tristeza#dolor#frustracion#deseo#odio#miedo#agotamiento#entusiasmo#humillacion#dependenciaEmocional#		aburrimiento		deseo	humillacion	malestar	tristeza				entusiasmo	calma	duda					dolor	frustracion	agotamiento		dependenciaEmocional	compasion			miedo				odio	0	0	Over 23
2021-04-26	calma#duda#compasion#diversion#aburrimiento#agrado#alegria#placer#satisfaccion#frustracion#deseo#amor#valentia#fortaleza#agotamiento#entusiasmo#arrogancia#apego#dependenciaEmocional#		aburrimiento	alegria	deseo					fortaleza		entusiasmo	calma	duda	placer	amor	valentia	diversion		frustracion	agotamiento	agrado	dependenciaEmocional	compasion	satisfaccion	apego		arrogancia				0	0	Over 23
2021-05-24	calma#duda#diversion#agrado#alegria#			alegria									calma	duda				diversion				agrado										0	0	Over 23
2021-04-26	calma#duda#diversion#malestar#alegria#satisfaccion#deseo#miedo#agotamiento#			alegria	deseo		malestar						calma	duda				diversion			agotamiento				satisfaccion		miedo					0	0	Over 23
2021-06-07	calma#duda#dolor#amor#miedo#												calma	duda		amor			dolor								miedo					0	0	Over 23
2021-05-24	calma#duda#ira#aburrimiento#malestar#alegria#dolor#frustracion#deseo#odio#valentia#fortaleza#agotamiento#entusiasmo#arrogancia#dependenciaEmocional#		aburrimiento	alegria	deseo		malestar			fortaleza		entusiasmo	calma	duda			valentia		dolor	frustracion	agotamiento		dependenciaEmocional					arrogancia	ira		odio	0	0	Over 23
2021-05-24	calma#frustracion#agotamiento#												calma							frustracion	agotamiento											0	0	Over 23
2021-05-24	calma#placer#deseo#valentia#				deseo								calma		placer		valentia															0	0	Over 23
2021-04-26	calma#satisfaccion#												calma												satisfaccion							0	0	Over 23
2021-05-24	calma#tension#malestar#	tension					malestar						calma																			0	0	Over 23
2021-05-24	calma#tristeza#							tristeza					calma																			0	0	Over 23
2021-06-07	certeza#deseo#fortaleza#				deseo				certeza	fortaleza																						0	0	Over 23
2021-05-24	diversion#																	diversion														0	0	Over 23
2021-05-24	diversion#agrado#alegria#deseo#			alegria	deseo													diversion				agrado										0	0	Over 23
2021-06-07	diversion#agrado#alegria#placer#			alegria											placer			diversion				agrado										0	0	Over 23
2021-05-24	duda#													duda																		0	0	Over 23
2021-05-10	duda#													duda																		0	0	Over 23
2021-04-26	duda#aburrimiento#frustracion#agotamiento#		aburrimiento											duda						frustracion	agotamiento											0	0	Over 23
2021-05-10	duda#compasion#placer#dolor#frustracion#fobia#amor#miedo#agotamiento#dependenciaEmocional#													duda	placer	amor			dolor	frustracion	agotamiento		dependenciaEmocional	compasion			miedo			fobia		0	0	Over 23
2021-05-10	duda#fortaleza#									fortaleza				duda																		0	0	Over 23
2021-04-26	duda#malestar#tristeza#agotamiento#						malestar	tristeza						duda							agotamiento											0	0	Over 23
2021-04-26	duda#malestar#tristeza#agotamiento#						malestar	tristeza						duda							agotamiento											0	0	Over 23
2021-04-26	duda#tristeza#agotamiento#							tristeza						duda							agotamiento											0	0	Over 23
2021-04-26	duda#tristeza#agotamiento#							tristeza						duda							agotamiento											0	0	Over 23
2021-04-26	ira#tristeza#dolor#amor#odio#humillacion#					humillacion		tristeza								amor			dolor										ira		odio	0	0	Over 23
2021-05-24	malestar#dolor#frustracion#fobia#amor#odio#agotamiento#humillacion#dependenciaEmocional#					humillacion	malestar									amor			dolor	frustracion	agotamiento		dependenciaEmocional							fobia	odio	0	0	Over 23
2021-04-26	malestar#tristeza#agotamiento#						malestar	tristeza													agotamiento											0	0	Over 23
2021-04-26	miedo#																										miedo					0	0	Over 23
2021-05-10	satisfaccion#																								satisfaccion							0	0	Over 23
2021-05-10	satisfaccion#																								satisfaccion							0	0	Over 23
2021-05-24	tension#	tension																														0	0	Over 23
2021-06-07	tension#agrado#malestar#	tension					malestar															agrado										0	0	Over 23
2021-05-24	tension#amor#	tension														amor																0	0	Over 23
2021-06-07	tension#certeza#	tension							certeza																							0	0	Over 23
2021-04-26	tension#dolor#deseo#amor#miedo#	tension			deseo											amor			dolor								miedo					0	0	Over 23
2021-06-07	tension#duda#agotamiento#	tension												duda							agotamiento											0	0	Over 23
2021-05-24	tension#duda#frustracion#deseo#agotamiento#arrogancia#	tension			deseo									duda						frustracion	agotamiento							arrogancia				0	0	Over 23
2021-05-24	tension#frustracion#miedo#	tension																		frustracion							miedo					0	0	Over 23
2021-04-26	tension#malestar#frustracion#agotamiento#	tension					malestar													frustracion	agotamiento											0	0	Over 23
2021-04-12	agotamiento#																				agotamiento											0	0	Over 23
2021-04-12	amor#miedo#agotamiento#apego#dependenciaEmocional#															amor					agotamiento		dependenciaEmocional			apego	miedo					0	0	Over 23
2021-04-12	calma#												calma																			0	0	Over 23
2021-04-12	calma#aburrimiento#agrado#satisfaccion#valentia#apatia#		aburrimiento								apatia		calma				valentia					agrado			satisfaccion							0	0	Over 23
2021-04-12	calma#aburrimiento#alegria#agotamiento#		aburrimiento	alegria									calma								agotamiento											0	0	Over 23
2021-04-12	calma#aburrimiento#malestar#tristeza#frustracion#miedo#agotamiento#arrogancia#dependenciaEmocional#		aburrimiento				malestar	tristeza					calma							frustracion	agotamiento		dependenciaEmocional				miedo	arrogancia				0	0	Over 23
2021-04-12	calma#aburrimiento#tristeza#placer#frustracion#deseo#miedo#agotamiento#arrogancia#dependenciaEmocional#		aburrimiento		deseo			tristeza					calma		placer					frustracion	agotamiento		dependenciaEmocional				miedo	arrogancia				0	0	Over 23
2021-04-12	calma#agrado#												calma									agrado										0	0	Over 23
2021-04-12	calma#agrado#alegria#satisfaccion#entusiasmo#			alegria								entusiasmo	calma									agrado			satisfaccion							0	0	Over 23
2021-04-12	calma#agrado#dependenciaEmocional#												calma									agrado	dependenciaEmocional									0	0	Over 23
2021-04-12	calma#agrado#placer#frustracion#agotamiento#entusiasmo#apego#											entusiasmo	calma		placer					frustracion	agotamiento	agrado				apego						0	0	Over 23
2021-04-12	calma#alegria#			alegria									calma																			0	0	Over 23
2021-04-12	calma#alegria#			alegria									calma																			0	0	Over 23
2021-04-12	calma#alegria#agotamiento#			alegria									calma								agotamiento											0	0	Over 23
2021-04-12	calma#certeza#compasion#diversion#agrado#alegria#placer#satisfaccion#deseo#amor#valentia#fortaleza#entusiasmo#apego#			alegria	deseo				certeza	fortaleza		entusiasmo	calma		placer	amor	valentia	diversion				agrado		compasion	satisfaccion	apego						0	0	Over 23
2021-04-12	calma#compasion#agrado#alegria#satisfaccion#fortaleza#apego#			alegria						fortaleza			calma									agrado		compasion	satisfaccion	apego						0	0	Over 23
2021-04-12	calma#diversion#agrado#												calma					diversion				agrado										0	0	Over 23
2021-03-31	calma#diversion#agrado#alegria#tristeza#amor#			alegria				tristeza					calma			amor		diversion				agrado										0	0	Over 23
2021-04-12	calma#diversion#alegria#			alegria									calma					diversion														0	0	Over 23
2021-04-12	calma#duda#												calma	duda																		0	0	Over 23
2021-04-12	calma#duda#compasion#aburrimiento#frustracion#agotamiento#		aburrimiento										calma	duda						frustracion	agotamiento			compasion								0	0	Over 23
2021-04-12	calma#duda#compasion#ira#diversion#agrado#alegria#tristeza#placer#dolor#satisfaccion#frustracion#amor#valentia#fortaleza#entusiasmo#arrogancia#apego#dependenciaEmocional#			alegria				tristeza		fortaleza		entusiasmo	calma	duda	placer	amor	valentia	diversion	dolor	frustracion		agrado	dependenciaEmocional	compasion	satisfaccion	apego		arrogancia	ira			0	0	Over 23
2021-04-12	duda#alegria#deseo#amor#agotamiento#			alegria	deseo									duda		amor					agotamiento											0	0	Over 23
2021-04-12	duda#diversion#agrado#alegria#deseo#apego#			alegria	deseo									duda				diversion				agrado				apego						0	0	Over 23
2021-04-12	tension#amor#miedo#agotamiento#apego#dependenciaEmocional#	tension														amor					agotamiento		dependenciaEmocional			apego	miedo					0	0	Over 23
2021-04-12	tension#certeza#amor#agotamiento#apego#dependenciaEmocional#	tension							certeza							amor					agotamiento		dependenciaEmocional			apego						0	0	Over 23
2021-04-12	tension#duda#compasion#agrado#amor#apatia#apego#	tension									apatia			duda		amor						agrado		compasion		apego						0	0	Over 23
2021-04-12	tension#malestar#agotamiento#	tension					malestar														agotamiento											0	0	Over 23
2021-04-12	tension#tristeza#amor#	tension						tristeza								amor																0	0	Over 23
2021-05-24	malestar#dolor#						malestar												dolor													0	0	Over 23
2021-05-24	calma#												calma																			0	0	Over 23
2021-06-07	ira#dolor#amor#															amor			dolor										ira			0	0	Over 23
2021-06-07	calma#aburrimiento#agrado#		aburrimiento										calma									agrado										0	0	Over 23
2021-05-24	calma#aburrimiento#alegria#		aburrimiento	alegria									calma																			0	0	Over 23
2021-05-24	certeza#alegria#tristeza#agotamiento#			alegria				tristeza	certeza												agotamiento											0	0	Over 23
2021-05-24	frustracion#																			frustracion												0	0	Over 23
2021-05-24	ira#malestar#dolor#agotamiento#dependenciaEmocional#						malestar												dolor		agotamiento		dependenciaEmocional						ira			0	0	Over 23
2021-05-24	calma#diversion#agrado#alegria#			alegria									calma					diversion				agrado										0	0	Over 23
2021-05-24	calma#certeza#alegria#amor#			alegria					certeza				calma			amor																0	0	Over 23
2021-05-24	placer#satisfaccion#entusiasmo#											entusiasmo			placer										satisfaccion							0	0	Over 23
2021-05-24	agrado#alegria#			alegria																		agrado										0	0	Over 23
2021-05-10	calma#tristeza#dolor#							tristeza					calma						dolor													0	0	Over 23
2021-06-07	fobia#																													fobia		0	0	Over 23
2021-04-26	valentia#																valentia															0	0	Over 23
2021-05-24	aburrimiento#tristeza#odio#		aburrimiento					tristeza																							odio	0	0	Over 23
2021-04-12	tension#malestar#frustracion#	tension					malestar													frustracion												0	0	Over 23
2021-05-24	calma#alegria#			alegria									calma																			0	0	Over 23
2021-04-12	calma#aburrimiento#alegria#tristeza#amor#miedo#dependenciaEmocional#		aburrimiento	alegria				tristeza					calma			amor							dependenciaEmocional				miedo					0	0	Over 23
2021-05-24	tension#duda#diversion#frustracion#	tension												duda				diversion		frustracion												0	0	Over 23
2021-05-24	valentia#																valentia															0	0	Over 23
2021-05-24	apego#																									apego						0	0	Over 23
2021-05-10	calma#compasion#												calma											compasion								0	0	Over 23
2021-05-10	calma#												calma																			0	0	Over 23
2021-06-07	alegria#			alegria																												0	0	Over 23
2021-06-07	fobia#																													fobia		0	0	Over 23
2021-05-24	malestar#						malestar																									0	0	Over 23
2021-06-07	aburrimiento#		aburrimiento																													0	0	Over 23
2021-06-07	aburrimiento#		aburrimiento																													0	0	Over 23
2021-06-07	aburrimiento#		aburrimiento																													0	0	Over 23
2021-05-24	aburrimiento#		aburrimiento																													0	0	Over 23
2021-06-07	aburrimiento#agrado#agotamiento#		aburrimiento																		agotamiento	agrado										0	0	Over 23
2021-05-24	aburrimiento#tristeza#apatia#arrogancia#		aburrimiento					tristeza			apatia																	arrogancia				0	0	Over 23
2021-06-07	agrado#alegria#			alegria																		agrado										0	0	Over 23
2021-05-10	agrado#alegria#amor#			alegria												amor						agrado										0	0	Over 23
2021-05-24	agrado#alegria#entusiasmo#			alegria								entusiasmo										agrado										0	0	Over 23
2021-05-10	agrado#deseo#				deseo																	agrado										0	0	Over 23
2021-06-07	agrado#tristeza#dolor#frustracion#deseo#entusiasmo#				deseo			tristeza				entusiasmo							dolor	frustracion		agrado										0	0	Over 23
2021-04-26	alegria#			alegria																												0	0	Over 23
2021-05-10	alegria#			alegria																												0	0	Over 23
2021-04-26	alegria#			alegria																												0	0	Over 23
2021-04-26	alegria#			alegria																												0	0	Over 23
2021-05-24	alegria#			alegria																												0	0	Over 23
2021-06-07	alegria#			alegria																												0	0	Over 23
2021-05-10	alegria#agotamiento#			alegria																	agotamiento											0	0	Over 23
2021-05-10	alegria#humillacion#			alegria		humillacion																										0	0	Over 23
2021-06-07	alegria#miedo#			alegria																							miedo					0	0	Over 23
2021-05-10	alegria#satisfaccion#amor#humillacion#			alegria		humillacion										amor									satisfaccion							0	0	Over 23
2021-04-26	apatia#										apatia																					0	0	Over 23
2021-05-24	calma#												calma																			0	0	Over 23
2021-06-07	calma#												calma																			0	0	Over 23
2021-04-26	calma#aburrimiento#		aburrimiento										calma																			0	0	Over 23
2021-05-10	calma#aburrimiento#		aburrimiento										calma																			0	0	Over 23
2021-06-07	calma#aburrimiento#		aburrimiento										calma																			0	0	Over 23
2021-05-10	calma#aburrimiento#		aburrimiento										calma																			0	0	Over 23
2021-06-07	calma#aburrimiento#		aburrimiento										calma																			0	0	Over 23
2021-05-10	calma#aburrimiento#agrado#alegria#satisfaccion#deseo#amor#miedo#agotamiento#		aburrimiento	alegria	deseo								calma			amor					agotamiento	agrado			satisfaccion		miedo					0	0	Over 23
2021-06-07	calma#aburrimiento#agrado#amor#		aburrimiento										calma			amor						agrado										0	0	Over 23
2021-05-24	calma#aburrimiento#malestar#alegria#dolor#		aburrimiento	alegria			malestar						calma						dolor													0	0	Over 23
2021-05-24	calma#aburrimiento#malestar#alegria#dolor#agotamiento#		aburrimiento	alegria			malestar						calma						dolor		agotamiento											0	0	Over 23
2021-05-24	calma#agotamiento#												calma								agotamiento											0	0	Over 23
2021-04-26	calma#agrado#												calma									agrado										0	0	Over 23
2021-05-26	calma#agrado#												calma									agrado										0	0	Over 23
2021-04-26	calma#agrado#												calma									agrado										0	0	Over 23
2021-05-10	calma#agrado#alegria#			alegria									calma									agrado										0	0	Over 23
2021-05-10	calma#agrado#alegria#frustracion#agotamiento#			alegria									calma							frustracion	agotamiento	agrado										0	0	Over 23
2021-05-10	calma#agrado#alegria#satisfaccion#deseo#amor#entusiasmo#			alegria	deseo							entusiasmo	calma			amor						agrado			satisfaccion							0	0	Over 23
2021-05-24	calma#agrado#alegria#satisfaccion#deseo#entusiasmo#			alegria	deseo							entusiasmo	calma									agrado			satisfaccion							0	0	Over 23
2021-04-26	calma#agrado#alegria#satisfaccion#entusiasmo#			alegria								entusiasmo	calma									agrado			satisfaccion							0	0	Over 23
2021-06-07	calma#agrado#apatia#										apatia		calma									agrado										0	0	Over 23
2021-04-26	calma#agrado#apatia#										apatia		calma									agrado										0	0	Over 23
2021-04-26	calma#agrado#apatia#										apatia		calma									agrado										0	0	Over 23
2021-05-24	calma#alegria#			alegria									calma																			0	0	Over 23
2021-05-26	calma#alegria#			alegria									calma																			0	0	Over 23
2021-04-26	calma#alegria#amor#dependenciaEmocional#			alegria									calma			amor							dependenciaEmocional									0	0	Over 23
2021-05-10	calma#alegria#frustracion#valentia#fortaleza#			alegria						fortaleza			calma				valentia			frustracion												0	0	Over 23
2021-04-26	calma#alegria#satisfaccion#			alegria									calma												satisfaccion							0	0	Over 23
2021-05-10	calma#alegria#satisfaccion#frustracion#valentia#fortaleza#			alegria						fortaleza			calma				valentia			frustracion					satisfaccion							0	0	Over 23
2021-06-07	calma#alegria#satisfaccion#valentia#			alegria									calma				valentia								satisfaccion							0	0	Over 23
2021-05-24	calma#certeza#agrado#alegria#placer#			alegria					certeza				calma		placer							agrado										0	0	Over 23
2021-05-10	calma#certeza#compasion#								certeza				calma											compasion								0	0	Over 23
2021-06-07	calma#certeza#compasion#diversion#agrado#alegria#			alegria					certeza				calma					diversion				agrado		compasion								0	0	Over 23
2021-05-10	calma#certeza#compasion#diversion#agrado#alegria#placer#satisfaccion#deseo#amor#valentia#fortaleza#			alegria	deseo				certeza	fortaleza			calma		placer	amor	valentia	diversion				agrado		compasion	satisfaccion							0	0	Over 23
2021-05-24	calma#certeza#compasion#diversion#agrado#alegria#placer#satisfaccion#deseo#amor#valentia#fortaleza#agotamiento#entusiasmo#arrogancia#apego#			alegria	deseo				certeza	fortaleza		entusiasmo	calma		placer	amor	valentia	diversion			agotamiento	agrado		compasion	satisfaccion	apego		arrogancia				0	0	Over 23
2021-05-24	calma#certeza#compasion#diversion#agrado#alegria#placer#satisfaccion#deseo#amor#valentia#fortaleza#agotamiento#entusiasmo#arrogancia#apego#			alegria	deseo				certeza	fortaleza		entusiasmo	calma		placer	amor	valentia	diversion			agotamiento	agrado		compasion	satisfaccion	apego		arrogancia				0	0	Over 23
2021-06-07	calma#certeza#compasion#diversion#agrado#alegria#placer#satisfaccion#deseo#amor#valentia#fortaleza#agotamiento#entusiasmo#arrogancia#apego#dependenciaEmocional#			alegria	deseo				certeza	fortaleza		entusiasmo	calma		placer	amor	valentia	diversion			agotamiento	agrado	dependenciaEmocional	compasion	satisfaccion	apego		arrogancia				0	0	Over 23
2021-05-10	calma#certeza#compasion#diversion#agrado#alegria#placer#satisfaccion#deseo#amor#valentia#fortaleza#entusiasmo#arrogancia#apego#			alegria	deseo				certeza	fortaleza		entusiasmo	calma		placer	amor	valentia	diversion				agrado		compasion	satisfaccion	apego		arrogancia				0	0	Over 23
2021-04-26	calma#certeza#compasion#diversion#agrado#alegria#placer#satisfaccion#deseo#amor#valentia#fortaleza#entusiasmo#arrogancia#apego#			alegria	deseo				certeza	fortaleza		entusiasmo	calma		placer	amor	valentia	diversion				agrado		compasion	satisfaccion	apego		arrogancia				0	0	Over 23
2021-04-26	calma#certeza#compasion#diversion#agrado#alegria#placer#satisfaccion#deseo#amor#valentia#fortaleza#entusiasmo#arrogancia#apego#			alegria	deseo				certeza	fortaleza		entusiasmo	calma		placer	amor	valentia	diversion				agrado		compasion	satisfaccion	apego		arrogancia				0	0	Over 23
2021-05-24	calma#certeza#compasion#diversion#agrado#alegria#placer#satisfaccion#deseo#amor#valentia#fortaleza#entusiasmo#arrogancia#apego#			alegria	deseo				certeza	fortaleza		entusiasmo	calma		placer	amor	valentia	diversion				agrado		compasion	satisfaccion	apego		arrogancia				0	0	Over 23
2021-05-24	calma#certeza#compasion#diversion#agrado#alegria#placer#valentia#			alegria					certeza				calma		placer		valentia	diversion				agrado		compasion								0	0	Over 23
2021-06-07	calma#certeza#compasion#ira#aburrimiento#malestar#alegria#placer#satisfaccion#frustracion#fobia#amor#odio#valentia#agotamiento#apatia#arrogancia#apego#		aburrimiento	alegria			malestar		certeza		apatia		calma		placer	amor	valentia			frustracion	agotamiento			compasion	satisfaccion	apego		arrogancia	ira	fobia	odio	0	0	Over 23
2021-05-24	calma#certeza#diversion#agotamiento#								certeza				calma					diversion			agotamiento											0	0	Over 23
2021-04-26	calma#certeza#diversion#agrado#alegria#			alegria					certeza				calma					diversion				agrado										0	0	Over 23
2021-06-07	calma#certeza#diversion#agrado#alegria#placer#satisfaccion#deseo#amor#valentia#fortaleza#entusiasmo#arrogancia#apego#			alegria	deseo				certeza	fortaleza		entusiasmo	calma		placer	amor	valentia	diversion				agrado			satisfaccion	apego		arrogancia				0	0	Over 23
2021-05-24	calma#certeza#diversion#alegria#amor#valentia#			alegria					certeza				calma			amor	valentia	diversion														0	0	Over 23
2021-05-10	calma#certeza#duda#compasion#diversion#agrado#alegria#placer#satisfaccion#deseo#amor#valentia#agotamiento#entusiasmo#arrogancia#apego#			alegria	deseo				certeza			entusiasmo	calma	duda	placer	amor	valentia	diversion			agotamiento	agrado		compasion	satisfaccion	apego		arrogancia				0	0	Over 23
2021-06-07	calma#certeza#duda#diversion#amor#								certeza				calma	duda		amor		diversion														0	0	Over 23
2021-06-07	calma#certeza#duda#ira#diversion#agrado#tristeza#dolor#satisfaccion#deseo#odio#miedo#fortaleza#entusiasmo#humillacion#dependenciaEmocional#				deseo	humillacion		tristeza	certeza	fortaleza		entusiasmo	calma	duda				diversion	dolor			agrado	dependenciaEmocional		satisfaccion		miedo		ira		odio	0	0	Over 23
2021-05-10	calma#certeza#entusiasmo#								certeza			entusiasmo	calma																			0	0	Over 23
2021-05-10	calma#certeza#ira#aburrimiento#malestar#alegria#dolor#satisfaccion#deseo#odio#valentia#agotamiento#entusiasmo#humillacion#apego#		aburrimiento	alegria	deseo	humillacion	malestar		certeza			entusiasmo	calma				valentia		dolor		agotamiento				satisfaccion	apego			ira		odio	0	0	Over 23
2021-05-10	calma#compasion#aburrimiento#agrado#alegria#satisfaccion#deseo#amor#agotamiento#		aburrimiento	alegria	deseo								calma			amor					agotamiento	agrado		compasion	satisfaccion							0	0	Over 23
2021-05-24	calma#compasion#alegria#miedo#			alegria									calma											compasion			miedo					0	0	Over 23
2021-04-26	calma#compasion#diversion#agrado#alegria#amor#valentia#entusiasmo#apego#			alegria								entusiasmo	calma			amor	valentia	diversion				agrado		compasion		apego						0	0	Over 23
2021-05-10	calma#diversion#agrado#alegria#entusiasmo#			alegria								entusiasmo	calma					diversion				agrado										0	0	Over 23
2021-04-26	calma#diversion#agrado#alegria#satisfaccion#valentia#agotamiento#			alegria									calma				valentia	diversion			agotamiento	agrado			satisfaccion							0	0	Over 23
2021-05-10	calma#diversion#agrado#deseo#entusiasmo#				deseo							entusiasmo	calma					diversion				agrado										0	0	Over 23
2021-05-10	calma#diversion#agrado#frustracion#												calma					diversion		frustracion		agrado										0	0	Over 23
2021-05-24	calma#diversion#alegria#			alegria									calma					diversion														0	0	Over 23
2021-06-07	calma#diversion#alegria#dolor#amor#			alegria									calma			amor		diversion	dolor													0	0	Over 23
2021-06-07	calma#diversion#alegria#frustracion#humillacion#			alegria		humillacion							calma					diversion		frustracion												0	0	Over 23
2021-05-29	calma#diversion#amor#												calma			amor		diversion														0	0	Over 23
2021-05-29	calma#diversion#amor#												calma			amor		diversion														0	0	Over 23
2021-05-29	calma#diversion#amor#												calma			amor		diversion														0	0	Over 23
2021-05-26	calma#diversion#dolor#fortaleza#									fortaleza			calma					diversion	dolor													0	0	Over 23
2021-04-26	calma#diversion#fortaleza#									fortaleza			calma					diversion														0	0	Over 23
2021-04-26	calma#diversion#placer#satisfaccion#deseo#valentia#fortaleza#entusiasmo#				deseo					fortaleza		entusiasmo	calma		placer		valentia	diversion							satisfaccion							0	0	Over 23
2021-05-10	calma#diversion#satisfaccion#												calma					diversion							satisfaccion							0	0	Over 23
2021-06-07	calma#duda#aburrimiento#malestar#alegria#		aburrimiento	alegria			malestar						calma	duda																		0	0	Over 23
2021-05-24	calma#duda#alegria#			alegria									calma	duda																		0	0	Over 23
2021-05-10	calma#duda#compasion#agrado#												calma	duda								agrado		compasion								0	0	Over 23
2021-05-24	calma#duda#diversion#agrado#												calma	duda				diversion				agrado										0	0	Over 23
2021-04-26	calma#duda#diversion#agrado#alegria#			alegria									calma	duda				diversion				agrado										0	0	Over 23
2021-04-26	calma#duda#diversion#agrado#alegria#deseo#amor#valentia#			alegria	deseo								calma	duda		amor	valentia	diversion				agrado										0	0	Over 23
2021-04-26	calma#duda#ira#aburrimiento#malestar#tristeza#dolor#frustracion#amor#valentia#fortaleza#agotamiento#		aburrimiento				malestar	tristeza		fortaleza			calma	duda		amor	valentia		dolor	frustracion	agotamiento								ira			0	0	Over 23
2021-04-26	calma#ira#aburrimiento#malestar#alegria#dolor#frustracion#amor#agotamiento#		aburrimiento	alegria			malestar						calma			amor			dolor	frustracion	agotamiento								ira			0	0	Over 23
2021-04-26	calma#ira#diversion#agrado#alegria#fortaleza#			alegria						fortaleza			calma					diversion				agrado							ira			0	0	Over 23
2021-04-26	calma#ira#diversion#agrado#alegria#fortaleza#			alegria						fortaleza			calma					diversion				agrado							ira			0	0	Over 23
2021-05-10	calma#satisfaccion#humillacion#					humillacion							calma												satisfaccion							0	0	Over 23
2021-05-10	calma#tension#certeza#duda#compasion#ira#diversion#aburrimiento#agrado#malestar#alegria#tristeza#placer#dolor#satisfaccion#frustracion#deseo#fobia#amor#odio#valentia#miedo#fortaleza#agotamiento#entusiasmo#apatia#arrogancia#humillacion#apego#dependenciaEmocional#	tension	aburrimiento	alegria	deseo	humillacion	malestar	tristeza	certeza	fortaleza	apatia	entusiasmo	calma	duda	placer	amor	valentia	diversion	dolor	frustracion	agotamiento	agrado	dependenciaEmocional	compasion	satisfaccion	apego	miedo	arrogancia	ira	fobia	odio	0	0	Over 23
2021-05-10	calma#tension#certeza#duda#compasion#ira#diversion#aburrimiento#agrado#malestar#alegria#tristeza#placer#dolor#satisfaccion#frustracion#deseo#fobia#amor#odio#valentia#miedo#fortaleza#agotamiento#entusiasmo#apatia#arrogancia#humillacion#apego#dependenciaEmocional#	tension	aburrimiento	alegria	deseo	humillacion	malestar	tristeza	certeza	fortaleza	apatia	entusiasmo	calma	duda	placer	amor	valentia	diversion	dolor	frustracion	agotamiento	agrado	dependenciaEmocional	compasion	satisfaccion	apego	miedo	arrogancia	ira	fobia	odio	0	0	Over 23
2021-05-10	calma#tension#certeza#duda#compasion#ira#diversion#aburrimiento#agrado#malestar#alegria#tristeza#placer#dolor#satisfaccion#frustracion#deseo#fobia#amor#odio#valentia#miedo#fortaleza#agotamiento#entusiasmo#apatia#arrogancia#humillacion#apego#dependenciaEmocional#	tension	aburrimiento	alegria	deseo	humillacion	malestar	tristeza	certeza	fortaleza	apatia	entusiasmo	calma	duda	placer	amor	valentia	diversion	dolor	frustracion	agotamiento	agrado	dependenciaEmocional	compasion	satisfaccion	apego	miedo	arrogancia	ira	fobia	odio	0	0	Over 23
2021-04-26	calma#tension#duda#compasion#ira#diversion#aburrimiento#agrado#tristeza#agotamiento#humillacion#	tension	aburrimiento			humillacion		tristeza					calma	duda				diversion			agotamiento	agrado		compasion					ira			0	0	Over 23
2021-05-10	certeza#								certeza																							0	0	Over 23
2021-05-24	certeza#diversion#								certeza									diversion														0	0	Over 23
2021-04-26	compasion#diversion#agrado#alegria#placer#satisfaccion#amor#miedo#fortaleza#entusiasmo#apego#			alegria						fortaleza		entusiasmo			placer	amor		diversion				agrado		compasion	satisfaccion	apego	miedo					0	0	Over 23
2021-04-26	compasion#diversion#agrado#alegria#placer#satisfaccion#deseo#amor#fortaleza#entusiasmo#			alegria	deseo					fortaleza		entusiasmo			placer	amor		diversion				agrado		compasion	satisfaccion							0	0	Over 23
2021-04-26	compasion#diversion#agrado#alegria#placer#satisfaccion#deseo#amor#fortaleza#entusiasmo#apego#			alegria	deseo					fortaleza		entusiasmo			placer	amor		diversion				agrado		compasion	satisfaccion	apego						0	0	Over 23
2021-05-10	diversion#																	diversion														0	0	Over 23
2021-05-24	diversion#																	diversion														0	0	Over 23
2021-05-24	diversion#agrado#alegria#			alegria														diversion				agrado										0	0	Over 23
2021-05-10	diversion#agrado#alegria#			alegria														diversion				agrado										0	0	Over 23
2021-05-24	diversion#agrado#alegria#			alegria														diversion				agrado										0	0	Over 23
2021-06-07	diversion#agrado#alegria#entusiasmo#			alegria								entusiasmo						diversion				agrado										0	0	Over 23
2021-05-24	diversion#agrado#alegria#fortaleza#entusiasmo#			alegria						fortaleza		entusiasmo						diversion				agrado										0	0	Over 23
2021-04-26	diversion#alegria#agotamiento#			alegria														diversion			agotamiento											0	0	Over 23
2021-04-26	diversion#alegria#amor#valentia#			alegria												amor	valentia	diversion														0	0	Over 23
2021-04-26	diversion#alegria#deseo#			alegria	deseo													diversion														0	0	Over 23
2021-05-10	diversion#alegria#frustracion#			alegria														diversion		frustracion												0	0	Over 23
2021-04-26	diversion#alegria#frustracion#entusiasmo#			alegria								entusiasmo						diversion		frustracion												0	0	Over 23
2021-05-24	diversion#alegria#valentia#fortaleza#			alegria						fortaleza							valentia	diversion														0	0	Over 23
2021-05-24	diversion#deseo#				deseo													diversion														0	0	Over 23
2021-05-24	diversion#deseo#				deseo													diversion														0	0	Over 23
2021-05-10	diversion#malestar#placer#fobia#agotamiento#						malestar								placer			diversion			agotamiento									fobia		0	0	Over 23
2021-05-10	dolor#																		dolor													0	0	Over 23
2021-05-24	dolor#fobia#valentia#fortaleza#agotamiento#humillacion#apego#					humillacion				fortaleza							valentia		dolor		agotamiento					apego				fobia		0	0	Over 23
2021-05-10	dolor#humillacion#					humillacion													dolor													0	0	Over 23
2021-06-07	duda#agotamiento#													duda							agotamiento											0	0	Over 23
2021-06-07	duda#agrado#valentia#													duda			valentia					agrado										0	0	Over 23
2021-06-07	duda#alegria#miedo#			alegria										duda													miedo					0	0	Over 23
2021-06-07	duda#amor#valentia#													duda		amor	valentia															0	0	Over 23
2021-05-24	duda#deseo#amor#				deseo									duda		amor																0	0	Over 23
2021-05-24	duda#diversion#alegria#amor#entusiasmo#			alegria								entusiasmo		duda		amor		diversion														0	0	Over 23
2021-05-24	duda#diversion#alegria#frustracion#			alegria										duda				diversion		frustracion												0	0	Over 23
2021-04-26	duda#diversion#deseo#valentia#				deseo									duda			valentia	diversion														0	0	Over 23
2021-05-10	duda#frustracion#humillacion#					humillacion								duda						frustracion												0	0	Over 23
2021-05-24	duda#placer#valentia#humillacion#					humillacion								duda	placer		valentia															0	0	Over 23
2021-05-10	frustracion#apatia#humillacion#					humillacion					apatia									frustracion												0	0	Over 23
2021-05-10	frustracion#apatia#humillacion#					humillacion					apatia									frustracion												0	0	Over 23
2021-05-10	frustracion#humillacion#					humillacion														frustracion												0	0	Over 23
2021-05-10	humillacion#					humillacion																										0	0	Over 23
2021-05-10	ira#aburrimiento#agrado#alegria#tristeza#placer#satisfaccion#frustracion#deseo#agotamiento#entusiasmo#		aburrimiento	alegria	deseo			tristeza				entusiasmo			placer					frustracion	agotamiento	agrado			satisfaccion				ira			0	0	Over 23
2021-05-24	ira#alegria#tristeza#dolor#satisfaccion#frustracion#odio#valentia#			alegria				tristeza									valentia		dolor	frustracion					satisfaccion				ira		odio	0	0	Over 23
2021-06-07	ira#diversion#aburrimiento#alegria#placer#dolor#satisfaccion#frustracion#deseo#odio#valentia#entusiasmo#		aburrimiento	alegria	deseo							entusiasmo			placer		valentia	diversion	dolor	frustracion					satisfaccion				ira		odio	0	0	Over 23
2021-05-10	ira#malestar#dolor#frustracion#humillacion#					humillacion	malestar												dolor	frustracion									ira			0	0	Over 23
2021-05-10	malestar#frustracion#humillacion#					humillacion	malestar													frustracion												0	0	Over 23
2021-05-10	placer#satisfaccion#														placer										satisfaccion							0	0	Over 23
2021-06-07	satisfaccion#																								satisfaccion							0	0	Over 23
2021-04-26	tension#aburrimiento#agrado#alegria#agotamiento#	tension	aburrimiento	alegria																	agotamiento	agrado										0	0	Over 23
2021-05-24	tension#agrado#alegria#	tension		alegria																		agrado										0	0	Over 23
2021-06-07	tension#agrado#amor#fortaleza#	tension								fortaleza						amor						agrado										0	0	Over 23
2021-06-07	tension#agrado#amor#fortaleza#	tension								fortaleza						amor						agrado										0	0	Over 23
2021-04-26	tension#agrado#malestar#alegria#placer#frustracion#miedo#agotamiento#	tension		alegria			malestar								placer					frustracion	agotamiento	agrado					miedo					0	0	Over 23
2021-04-26	tension#alegria#satisfaccion#deseo#amor#entusiasmo#apego#	tension		alegria	deseo							entusiasmo				amor									satisfaccion	apego						0	0	Over 23
2021-06-07	tension#certeza#compasion#diversion#agrado#alegria#frustracion#fortaleza#entusiasmo#	tension		alegria					certeza	fortaleza		entusiasmo						diversion		frustracion		agrado		compasion								0	0	Over 23
2021-05-24	tension#certeza#ira#diversion#malestar#alegria#dolor#satisfaccion#odio#valentia#agotamiento#entusiasmo#humillacion#apego#	tension		alegria		humillacion	malestar		certeza			entusiasmo					valentia	diversion	dolor		agotamiento				satisfaccion	apego			ira		odio	0	0	Over 23
2021-06-07	tension#compasion#aburrimiento#agrado#apatia#	tension	aburrimiento								apatia											agrado		compasion								0	0	Over 23
2021-05-10	tension#diversion#valentia#fortaleza#	tension								fortaleza							valentia	diversion														0	0	Over 23
2021-05-24	tension#duda#agrado#amor#agotamiento#entusiasmo#	tension										entusiasmo		duda		amor					agotamiento	agrado										0	0	Over 23
2021-06-07	tension#duda#compasion#aburrimiento#malestar#dolor#deseo#fobia#odio#miedo#agotamiento#apatia#humillacion#	tension	aburrimiento		deseo	humillacion	malestar				apatia			duda					dolor		agotamiento			compasion			miedo			fobia	odio	0	0	Over 23
2021-05-10	tension#duda#diversion#agrado#alegria#amor#fortaleza#agotamiento#	tension		alegria						fortaleza				duda		amor		diversion			agotamiento	agrado										0	0	Over 23
2021-05-10	tension#duda#ira#aburrimiento#malestar#tristeza#frustracion#odio#agotamiento#dependenciaEmocional#	tension	aburrimiento				malestar	tristeza						duda						frustracion	agotamiento		dependenciaEmocional						ira		odio	0	0	Over 23
2021-05-24	tension#duda#ira#aburrimiento#malestar#tristeza#frustracion#odio#miedo#agotamiento#apatia#dependenciaEmocional#	tension	aburrimiento				malestar	tristeza			apatia			duda						frustracion	agotamiento		dependenciaEmocional				miedo		ira		odio	0	0	Over 23
2021-05-10	tension#duda#ira#diversion#malestar#tristeza#dolor#frustracion#deseo#odio#miedo#agotamiento#apatia#humillacion#apego#dependenciaEmocional#	tension			deseo	humillacion	malestar	tristeza			apatia			duda				diversion	dolor	frustracion	agotamiento		dependenciaEmocional			apego	miedo		ira		odio	0	0	Over 23
2021-06-07	tension#duda#ira#malestar#dolor#frustracion#agotamiento#humillacion#	tension				humillacion	malestar							duda					dolor	frustracion	agotamiento								ira			0	0	Over 23
2021-04-26	tension#duda#malestar#frustracion#agotamiento#	tension					malestar							duda						frustracion	agotamiento											0	0	Over 23
2021-05-10	valentia#																valentia															0	0	Over 23
2021-04-12	agrado#alegria#tristeza#dolor#deseo#fortaleza#			alegria	deseo			tristeza		fortaleza									dolor			agrado										0	0	Over 23
2021-04-12	alegria#			alegria																												0	0	Over 23
2021-04-12	calma#aburrimiento#alegria#amor#		aburrimiento	alegria									calma			amor																0	0	Over 23
2021-04-12	calma#aburrimiento#tristeza#frustracion#deseo#		aburrimiento		deseo			tristeza					calma							frustracion												0	0	Over 23
2021-04-12	calma#agotamiento#												calma								agotamiento											0	0	Over 23
2021-04-12	calma#agotamiento#												calma								agotamiento											0	0	Over 23
2021-04-12	calma#agrado#												calma									agrado										0	0	Over 23
2021-04-12	calma#agrado#												calma									agrado										0	0	Over 23
2021-04-12	calma#agrado#												calma									agrado										0	0	Over 23
2021-04-12	calma#agrado#												calma									agrado										0	0	Over 23
2021-04-12	calma#agrado#alegria#agotamiento#			alegria									calma								agotamiento	agrado										0	0	Over 23
2021-04-12	calma#agrado#alegria#dependenciaEmocional#			alegria									calma									agrado	dependenciaEmocional									0	0	Over 23
2021-04-12	calma#agrado#alegria#placer#			alegria									calma		placer							agrado										0	0	Over 23
2021-04-12	calma#agrado#alegria#satisfaccion#entusiasmo#			alegria								entusiasmo	calma									agrado			satisfaccion							0	0	Over 23
2021-04-12	calma#alegria#			alegria									calma																			0	0	Over 23
2021-04-12	calma#certeza#compasion#diversion#placer#satisfaccion#entusiasmo#humillacion#apego#					humillacion			certeza			entusiasmo	calma		placer			diversion						compasion	satisfaccion	apego						0	0	Over 23
2021-04-12	calma#certeza#diversion#agrado#alegria#satisfaccion#fortaleza#			alegria					certeza	fortaleza			calma					diversion				agrado			satisfaccion							0	0	Over 23
2021-04-12	calma#compasion#diversion#alegria#agotamiento#			alegria									calma					diversion			agotamiento			compasion								0	0	Over 23
2021-04-12	calma#diversion#												calma					diversion														0	0	Over 23
2021-04-12	calma#diversion#agrado#alegria#satisfaccion#deseo#fortaleza#entusiasmo#			alegria	deseo					fortaleza		entusiasmo	calma					diversion				agrado			satisfaccion							0	0	Over 23
2021-04-12	calma#diversion#agrado#deseo#agotamiento#entusiasmo#				deseo							entusiasmo	calma					diversion			agotamiento	agrado										0	0	Over 23
2021-04-12	calma#diversion#alegria#fortaleza#entusiasmo#arrogancia#			alegria						fortaleza		entusiasmo	calma					diversion										arrogancia				0	0	Over 23
2021-04-12	calma#diversion#alegria#placer#satisfaccion#deseo#dependenciaEmocional#			alegria	deseo								calma		placer			diversion					dependenciaEmocional		satisfaccion							0	0	Over 23
2021-04-12	calma#duda#aburrimiento#agrado#alegria#amor#agotamiento#		aburrimiento	alegria									calma	duda		amor					agotamiento	agrado										0	0	Over 23
2021-04-12	calma#duda#aburrimiento#alegria#placer#fortaleza#entusiasmo#dependenciaEmocional#		aburrimiento	alegria						fortaleza		entusiasmo	calma	duda	placer								dependenciaEmocional									0	0	Over 23
2021-04-12	calma#duda#agrado#deseo#dependenciaEmocional#				deseo								calma	duda								agrado	dependenciaEmocional									0	0	Over 23
2021-04-12	calma#duda#compasion#diversion#malestar#alegria#placer#deseo#amor#			alegria	deseo		malestar						calma	duda	placer	amor		diversion						compasion								0	0	Over 23
2021-04-12	calma#duda#deseo#dependenciaEmocional#				deseo								calma	duda									dependenciaEmocional									0	0	Over 23
2021-04-12	calma#duda#deseo#fortaleza#dependenciaEmocional#				deseo					fortaleza			calma	duda									dependenciaEmocional									0	0	Over 23
2021-04-12	calma#tension#certeza#compasion#diversion#aburrimiento#alegria#placer#deseo#amor#valentia#fortaleza#entusiasmo#arrogancia#apego#dependenciaEmocional#	tension	aburrimiento	alegria	deseo				certeza	fortaleza		entusiasmo	calma		placer	amor	valentia	diversion					dependenciaEmocional	compasion		apego		arrogancia				0	0	Over 23
2021-04-12	calma#tension#certeza#compasion#diversion#agrado#alegria#placer#satisfaccion#deseo#amor#valentia#fortaleza#entusiasmo#arrogancia#apego#	tension		alegria	deseo				certeza	fortaleza		entusiasmo	calma		placer	amor	valentia	diversion				agrado		compasion	satisfaccion	apego		arrogancia				0	0	Over 23
2021-04-12	duda#agrado#apatia#dependenciaEmocional#										apatia			duda								agrado	dependenciaEmocional									0	0	Over 23
2021-04-12	duda#agrado#satisfaccion#deseo#fortaleza#entusiasmo#apego#				deseo					fortaleza		entusiasmo		duda								agrado			satisfaccion	apego						0	0	Over 23
2021-04-12	duda#deseo#valentia#fortaleza#entusiasmo#				deseo					fortaleza		entusiasmo		duda			valentia															0	0	Over 23
2021-04-12	duda#ira#alegria#placer#satisfaccion#frustracion#deseo#			alegria	deseo									duda	placer					frustracion					satisfaccion				ira			0	0	Over 23
2021-04-12	duda#malestar#alegria#amor#			alegria			malestar							duda		amor																0	0	Over 23
2021-04-12	tension#certeza#compasion#aburrimiento#malestar#tristeza#placer#satisfaccion#deseo#amor#valentia#agotamiento#apatia#arrogancia#dependenciaEmocional#	tension	aburrimiento		deseo		malestar	tristeza	certeza		apatia				placer	amor	valentia				agotamiento		dependenciaEmocional	compasion	satisfaccion			arrogancia				0	0	Over 23
2021-04-12	tension#duda#agrado#deseo#entusiasmo#	tension			deseo							entusiasmo		duda								agrado										0	0	Over 23
2021-06-07	placer#satisfaccion#														placer										satisfaccion							0	0	Over 23
2021-05-10	calma#certeza#compasion#diversion#agrado#								certeza				calma					diversion				agrado		compasion								0	0	Over 23
2021-05-10	calma#certeza#compasion#diversion#agrado#alegria#placer#satisfaccion#deseo#			alegria	deseo				certeza				calma		placer			diversion				agrado		compasion	satisfaccion							0	0	Over 23
2021-05-10	calma#certeza#compasion#diversion#agrado#alegria#			alegria					certeza				calma					diversion				agrado		compasion								0	0	Over 23
2021-04-12	calma#diversion#alegria#satisfaccion#entusiasmo#			alegria								entusiasmo	calma					diversion							satisfaccion							0	0	Over 23
2021-06-07	certeza#agrado#alegria#amor#			alegria					certeza							amor						agrado										0	0	Over 23
2021-06-07	amor#															amor																0	0	Over 23
2021-04-26	calma#compasion#diversion#alegria#amor#			alegria									calma			amor		diversion						compasion								0	0	Over 23
2021-06-07	tension#duda#compasion#miedo#	tension												duda										compasion			miedo					0	0	Over 23
2021-04-26	tristeza#frustracion#							tristeza												frustracion												0	0	Over 23
2021-05-24	ira#agrado#																					agrado							ira			0	0	Over 23
2021-04-12	compasion#tristeza#apatia#							tristeza			apatia													compasion								0	0	Over 23
2021-05-10	calma#aburrimiento#		aburrimiento										calma																			0	0	Over 23
2021-05-10	aburrimiento#		aburrimiento																													0	0	Over 23
2021-06-07	aburrimiento#malestar#		aburrimiento				malestar																									0	0	Over 23
2021-06-07	aburrimiento#malestar#		aburrimiento				malestar																									0	0	Over 23
2021-04-12	calma#alegria#tristeza#frustracion#			alegria				tristeza					calma							frustracion												0	0	Over 23
2021-04-26	certeza#alegria#amor#			alegria					certeza							amor																0	0	Over 23
2021-04-26	aburrimiento#		aburrimiento																													0	0	Over 23
2021-04-26	calma#aburrimiento#		aburrimiento										calma																			0	0	Over 23
2021-06-07	tension#alegria#frustracion#	tension		alegria																frustracion												0	0	Over 23
2021-06-07	tension#malestar#	tension					malestar																									0	0	Over 23
2021-04-12	ira#aburrimiento#tristeza#frustracion#agotamiento#		aburrimiento					tristeza												frustracion	agotamiento								ira			0	0	Over 23
2021-05-10	agrado#alegria#			alegria																		agrado										0	0	Over 23
2021-05-10	malestar#alegria#			alegria			malestar																									0	0	Over 23
2021-04-26	tension#duda#compasion#malestar#tristeza#	tension					malestar	tristeza						duda										compasion								0	0	Over 23
2021-04-12	satisfaccion#frustracion#																			frustracion					satisfaccion							0	0	Over 23
2021-04-26	tristeza#frustracion#							tristeza												frustracion												0	0	Over 23
2021-05-24	ira#																												ira			0	0	Over 23
2021-05-24	deseo#fortaleza#				deseo					fortaleza																						0	0	Over 23
2021-05-10	diversion#alegria#deseo#			alegria	deseo													diversion														0	0	Over 23
2021-05-10	tension#miedo#	tension																									miedo					0	0	Over 23
2021-06-07	certeza#entusiasmo#								certeza			entusiasmo																				0	0	Over 23
2021-06-07	compasion#tristeza#							tristeza																compasion								0	0	Over 23
2021-04-26	tension#duda#tristeza#agotamiento#	tension						tristeza						duda							agotamiento											0	0	Over 23
2021-04-26	tension#duda#aburrimiento#dolor#fobia#agotamiento#	tension	aburrimiento											duda					dolor		agotamiento									fobia		0	0	Over 23
2021-04-26	tristeza#odio#							tristeza																							odio	0	0	Over 23
2021-04-26	alegria#agotamiento#			alegria																	agotamiento											0	0	Over 23
2021-04-26	agrado#alegria#entusiasmo#			alegria								entusiasmo										agrado										0	0	Over 23
2021-04-26	certeza#diversion#agrado#alegria#satisfaccion#frustracion#deseo#fortaleza#			alegria	deseo				certeza	fortaleza								diversion		frustracion		agrado			satisfaccion							0	0	Over 23
2021-04-12	agrado#tristeza#apatia#dependenciaEmocional#							tristeza			apatia											agrado	dependenciaEmocional									0	0	Over 23
2021-05-10	ira#tristeza#							tristeza																					ira			0	0	Over 23
2021-04-26	calma#aburrimiento#frustracion#		aburrimiento										calma							frustracion												0	0	Over 23
2021-04-26	aburrimiento#agotamiento#		aburrimiento																		agotamiento											0	0	Over 23
2021-05-10	calma#diversion#alegria#miedo#			alegria									calma					diversion									miedo					0	0	Over 23
2021-04-26	calma#agrado#alegria#			alegria									calma									agrado										0	0	Over 23
2021-04-12	certeza#duda#tristeza#							tristeza	certeza					duda																		0	0	Over 23
2021-05-24	certeza#alegria#entusiasmo#			alegria					certeza			entusiasmo																				0	0	Over 23
2021-05-10	diversion#alegria#			alegria														diversion														0	0	Over 23
2021-04-26	ira#tristeza#							tristeza																					ira			0	0	Over 23
2021-05-10	tension#malestar#	tension					malestar																									0	0	Over 23
2021-04-26	certeza#agrado#alegria#entusiasmo#			alegria					certeza			entusiasmo										agrado										0	0	Over 23
2021-04-26	tristeza#dolor#frustracion#deseo#amor#apego#dependenciaEmocional#				deseo			tristeza								amor			dolor	frustracion			dependenciaEmocional			apego						0	0	Over 23
2021-04-12	calma#dolor#fortaleza#									fortaleza			calma						dolor													0	0	Over 23
2021-04-12	ira#dolor#odio#agotamiento#																		dolor		agotamiento								ira		odio	0	0	Over 23
2021-04-26	ira#tristeza#							tristeza																					ira			0	0	Over 23
2021-05-24	calma#certeza#diversion#alegria#			alegria					certeza				calma					diversion														0	0	Over 23
2021-06-07	agrado#alegria#placer#amor#valentia#			alegria											placer	amor	valentia					agrado										0	0	Over 23
2021-06-07	alegria#frustracion#entusiasmo#			alegria								entusiasmo								frustracion												0	0	Over 23
2021-04-12	aburrimiento#miedo#		aburrimiento																								miedo					0	0	Over 23
2021-04-12	tristeza#frustracion#							tristeza												frustracion												0	0	Over 23
2021-05-24	aburrimiento#apatia#		aburrimiento								apatia																					0	0	Over 23
2021-06-07	calma#alegria#frustracion#dependenciaEmocional#			alegria									calma							frustracion			dependenciaEmocional									0	0	Over 23
2021-05-24	agrado#alegria#entusiasmo#			alegria								entusiasmo										agrado										0	0	Over 23
2021-04-12	ira#aburrimiento#malestar#tristeza#frustracion#		aburrimiento				malestar	tristeza												frustracion									ira			0	0	Over 23
2021-05-24	calma#agrado#												calma									agrado										0	0	Over 23
2021-05-24	compasion#deseo#				deseo																			compasion								0	0	Over 23
2021-05-24	aburrimiento#alegria#		aburrimiento	alegria																												0	0	Over 23
2021-05-24	tension#agrado#	tension																				agrado										0	0	Over 23
2021-06-07	certeza#alegria#fobia#agotamiento#humillacion#apego#			alegria		humillacion			certeza												agotamiento					apego				fobia		0	0	Over 23
2021-06-07	humillacion#					humillacion																										0	0	Over 23
2021-04-26	calma#alegria#amor#			alegria									calma			amor																0	0	Over 23
2021-04-26	aburrimiento#alegria#tristeza#placer#dolor#amor#		aburrimiento	alegria				tristeza							placer	amor			dolor													0	0	Over 23
2021-05-10	malestar#frustracion#humillacion#					humillacion	malestar													frustracion												0	0	Over 23
2021-05-10	compasion#diversion#agrado#alegria#			alegria														diversion				agrado		compasion								0	0	Over 23
2021-05-10	ira#malestar#humillacion#					humillacion	malestar																						ira			0	0	Over 23
2021-04-26	tristeza#							tristeza																								0	0	Over 23
2021-04-12	alegria#			alegria																												0	0	Over 23
2021-04-12	deseo#valentia#				deseo												valentia															0	0	Over 23
2021-05-24	tristeza#amor#							tristeza								amor																0	0	Over 23
2021-06-07	entusiasmo#humillacion#					humillacion						entusiasmo																				0	0	Over 23
2021-05-24	alegria#frustracion#arrogancia#			alegria																frustracion								arrogancia				0	0	Over 23
2021-05-10	aburrimiento#		aburrimiento																													0	0	Over 23
2021-05-24	aburrimiento#		aburrimiento																													0	0	Over 23
2021-06-07	aburrimiento#agrado#alegria#		aburrimiento	alegria																		agrado										0	0	Over 23
2021-05-24	aburrimiento#agrado#alegria#		aburrimiento	alegria																		agrado										0	0	Over 23
2021-06-07	aburrimiento#agrado#alegria#placer#satisfaccion#amor#valentia#fortaleza#entusiasmo#humillacion#apego#		aburrimiento	alegria		humillacion				fortaleza		entusiasmo			placer	amor	valentia					agrado			satisfaccion	apego						0	0	Over 23
2021-05-24	aburrimiento#alegria#agotamiento#		aburrimiento	alegria																	agotamiento											0	0	Over 23
2021-05-10	aburrimiento#frustracion#		aburrimiento																	frustracion												0	0	Over 23
2021-06-07	aburrimiento#malestar#deseo#agotamiento#		aburrimiento		deseo		malestar														agotamiento											0	0	Over 23
2021-05-10	aburrimiento#tristeza#dolor#odio#miedo#agotamiento#		aburrimiento					tristeza											dolor		agotamiento						miedo				odio	0	0	Over 23
2021-05-10	agotamiento#																				agotamiento											0	0	Over 23
2021-05-10	agrado#alegria#			alegria																		agrado										0	0	Over 23
2021-05-24	agrado#alegria#			alegria																		agrado										0	0	Over 23
2021-05-10	agrado#alegria#entusiasmo#			alegria								entusiasmo										agrado										0	0	Over 23
2021-06-07	alegria#			alegria																												0	0	Over 23
2021-06-07	alegria#			alegria																												0	0	Over 23
2021-06-07	alegria#			alegria																												0	0	Over 23
2021-05-10	apego#																									apego						0	0	Over 23
2021-05-24	calma#												calma																			0	0	Over 23
2021-05-10	calma#												calma																			0	0	Over 23
2021-05-24	calma#												calma																			0	0	Over 23
2021-06-07	calma#												calma																			0	0	Over 23
2021-05-24	calma#												calma																			0	0	Over 23
2021-06-07	calma#												calma																			0	0	Over 23
2021-04-26	calma#												calma																			0	0	Over 23
2021-04-26	calma#aburrimiento#agotamiento#		aburrimiento										calma								agotamiento											0	0	Over 23
2021-04-26	calma#aburrimiento#agrado#alegria#fortaleza#entusiasmo#		aburrimiento	alegria						fortaleza		entusiasmo	calma									agrado										0	0	Over 23
2021-04-26	calma#aburrimiento#alegria#		aburrimiento	alegria									calma																			0	0	Over 23
2021-04-26	calma#aburrimiento#alegria#		aburrimiento	alegria									calma																			0	0	Over 23
2021-04-26	calma#aburrimiento#alegria#entusiasmo#		aburrimiento	alegria								entusiasmo	calma																			0	0	Over 23
2021-05-24	calma#aburrimiento#odio#		aburrimiento										calma																		odio	0	0	Over 23
2021-06-07	calma#aburrimiento#tristeza#		aburrimiento					tristeza					calma																			0	0	Over 23
2021-06-07	calma#agrado#alegria#			alegria									calma									agrado										0	0	Over 23
2021-04-26	calma#alegria#entusiasmo#			alegria								entusiasmo	calma																			0	0	Over 23
2021-05-24	calma#alegria#fortaleza#agotamiento#			alegria						fortaleza			calma								agotamiento											0	0	Over 23
2021-05-24	calma#alegria#placer#			alegria									calma		placer																	0	0	Over 23
2021-04-26	calma#alegria#placer#amor#fortaleza#apego#			alegria						fortaleza			calma		placer	amor										apego						0	0	Over 23
2021-04-26	calma#certeza#compasion#aburrimiento#agrado#alegria#apatia#arrogancia#		aburrimiento	alegria					certeza		apatia		calma									agrado		compasion				arrogancia				0	0	Over 23
2021-04-26	calma#certeza#compasion#aburrimiento#agrado#alegria#apatia#arrogancia#		aburrimiento	alegria					certeza		apatia		calma									agrado		compasion				arrogancia				0	0	Over 23
2021-05-10	calma#certeza#compasion#aburrimiento#agrado#alegria#placer#satisfaccion#deseo#amor#fortaleza#agotamiento#entusiasmo#arrogancia#apego#		aburrimiento	alegria	deseo				certeza	fortaleza		entusiasmo	calma		placer	amor					agotamiento	agrado		compasion	satisfaccion	apego		arrogancia				0	0	Over 23
2021-04-26	calma#certeza#compasion#aburrimiento#agrado#alegria#placer#satisfaccion#deseo#amor#valentia#agotamiento#entusiasmo#arrogancia#apego#		aburrimiento	alegria	deseo				certeza			entusiasmo	calma		placer	amor	valentia				agotamiento	agrado		compasion	satisfaccion	apego		arrogancia				0	0	Over 23
2021-05-24	calma#certeza#compasion#diversion#aburrimiento#agrado#alegria#placer#satisfaccion#deseo#amor#valentia#fortaleza#agotamiento#entusiasmo#arrogancia#apego#		aburrimiento	alegria	deseo				certeza	fortaleza		entusiasmo	calma		placer	amor	valentia	diversion			agotamiento	agrado		compasion	satisfaccion	apego		arrogancia				0	0	Over 23
2021-05-10	calma#certeza#compasion#diversion#aburrimiento#agrado#alegria#placer#satisfaccion#deseo#amor#valentia#fortaleza#entusiasmo#arrogancia#humillacion#apego#		aburrimiento	alegria	deseo	humillacion			certeza	fortaleza		entusiasmo	calma		placer	amor	valentia	diversion				agrado		compasion	satisfaccion	apego		arrogancia				0	0	Over 23
2021-04-26	calma#certeza#compasion#diversion#agrado#alegria#placer#satisfaccion#deseo#amor#valentia#agotamiento#apatia#arrogancia#apego#			alegria	deseo				certeza		apatia		calma		placer	amor	valentia	diversion			agotamiento	agrado		compasion	satisfaccion	apego		arrogancia				0	0	Over 23
2021-05-10	calma#certeza#compasion#diversion#agrado#alegria#placer#satisfaccion#deseo#amor#valentia#fortaleza#entusiasmo#arrogancia#apego#			alegria	deseo				certeza	fortaleza		entusiasmo	calma		placer	amor	valentia	diversion				agrado		compasion	satisfaccion	apego		arrogancia				0	0	Over 23
2021-05-10	calma#certeza#compasion#satisfaccion#deseo#fortaleza#				deseo				certeza	fortaleza			calma											compasion	satisfaccion							0	0	Over 23
2021-05-10	calma#certeza#satisfaccion#fortaleza#								certeza	fortaleza			calma												satisfaccion							0	0	Over 23
2021-05-10	calma#compasion#aburrimiento#alegria#		aburrimiento	alegria									calma											compasion								0	0	Over 23
2021-05-24	calma#compasion#agrado#alegria#			alegria									calma									agrado		compasion								0	0	Over 23
2021-04-26	calma#compasion#alegria#agotamiento#			alegria									calma								agotamiento			compasion								0	0	Over 23
2021-06-07	calma#compasion#diversion#alegria#amor#fortaleza#			alegria						fortaleza			calma			amor		diversion						compasion								0	0	Over 23
2021-05-10	calma#deseo#amor#valentia#				deseo								calma			amor	valentia															0	0	Over 23
2021-05-24	calma#diversion#agrado#alegria#			alegria									calma					diversion				agrado										0	0	Over 23
2021-06-07	calma#diversion#agrado#alegria#placer#satisfaccion#deseo#valentia#			alegria	deseo								calma		placer		valentia	diversion				agrado			satisfaccion							0	0	Over 23
2021-05-10	calma#diversion#agrado#alegria#valentia#fortaleza#			alegria						fortaleza			calma				valentia	diversion				agrado										0	0	Over 23
2021-04-26	calma#diversion#alegria#amor#entusiasmo#			alegria								entusiasmo	calma			amor		diversion														0	0	Over 23
2021-04-26	calma#diversion#alegria#amor#valentia#			alegria									calma			amor	valentia	diversion														0	0	Over 23
2021-04-26	calma#diversion#alegria#satisfaccion#entusiasmo#			alegria								entusiasmo	calma					diversion							satisfaccion							0	0	Over 23
2021-05-24	calma#diversion#alegria#valentia#			alegria									calma				valentia	diversion														0	0	Over 23
2021-05-24	calma#diversion#alegria#valentia#fortaleza#			alegria						fortaleza			calma				valentia	diversion														0	0	Over 23
2021-04-26	calma#duda#aburrimiento#agotamiento#		aburrimiento										calma	duda							agotamiento											0	0	Over 23
2021-05-24	calma#duda#aburrimiento#deseo#agotamiento#dependenciaEmocional#		aburrimiento		deseo								calma	duda							agotamiento		dependenciaEmocional									0	0	Over 23
2021-06-07	calma#duda#aburrimiento#frustracion#deseo#agotamiento#		aburrimiento		deseo								calma	duda						frustracion	agotamiento											0	0	Over 23
2021-05-24	calma#duda#compasion#aburrimiento#agrado#alegria#placer#satisfaccion#deseo#amor#valentia#agotamiento#entusiasmo#arrogancia#		aburrimiento	alegria	deseo							entusiasmo	calma	duda	placer	amor	valentia				agotamiento	agrado		compasion	satisfaccion			arrogancia				0	0	Over 23
2021-06-07	calma#duda#compasion#diversion#malestar#alegria#placer#satisfaccion#deseo#amor#valentia#fortaleza#entusiasmo#humillacion#apego#			alegria	deseo	humillacion	malestar			fortaleza		entusiasmo	calma	duda	placer	amor	valentia	diversion						compasion	satisfaccion	apego						0	0	Over 23
2021-04-26	calma#duda#compasion#ira#aburrimiento#malestar#tristeza#dolor#frustracion#fobia#miedo#agotamiento#humillacion#dependenciaEmocional#		aburrimiento			humillacion	malestar	tristeza					calma	duda					dolor	frustracion	agotamiento		dependenciaEmocional	compasion			miedo		ira	fobia		0	0	Over 23
2021-05-10	calma#duda#diversion#agrado#alegria#			alegria									calma	duda				diversion				agrado										0	0	Over 23
2021-05-24	calma#duda#ira#aburrimiento#agrado#malestar#alegria#dolor#frustracion#deseo#odio#valentia#fortaleza#apatia#arrogancia#apego#		aburrimiento	alegria	deseo		malestar			fortaleza	apatia		calma	duda			valentia		dolor	frustracion		agrado				apego		arrogancia	ira		odio	0	0	Over 23
2021-06-07	calma#duda#ira#diversion#agrado#alegria#placer#dolor#satisfaccion#deseo#odio#valentia#agotamiento#entusiasmo#humillacion#apego#			alegria	deseo	humillacion						entusiasmo	calma	duda	placer		valentia	diversion	dolor		agotamiento	agrado			satisfaccion	apego			ira		odio	0	0	Over 23
2021-05-10	calma#fortaleza#									fortaleza			calma																			0	0	Over 23
2021-05-10	calma#ira#malestar#tristeza#dolor#frustracion#odio#agotamiento#dependenciaEmocional#						malestar	tristeza					calma						dolor	frustracion	agotamiento		dependenciaEmocional						ira		odio	0	0	Over 23
2021-05-24	calma#tension#certeza#duda#compasion#ira#diversion#aburrimiento#agrado#malestar#alegria#tristeza#placer#dolor#satisfaccion#frustracion#deseo#fobia#amor#odio#valentia#miedo#fortaleza#agotamiento#entusiasmo#apatia#arrogancia#humillacion#apego#dependenciaEmocional#	tension	aburrimiento	alegria	deseo	humillacion	malestar	tristeza	certeza	fortaleza	apatia	entusiasmo	calma	duda	placer	amor	valentia	diversion	dolor	frustracion	agotamiento	agrado	dependenciaEmocional	compasion	satisfaccion	apego	miedo	arrogancia	ira	fobia	odio	0	0	Over 23
2021-05-24	calma#tension#certeza#duda#compasion#ira#diversion#aburrimiento#agrado#malestar#alegria#tristeza#placer#dolor#satisfaccion#frustracion#deseo#fobia#amor#odio#valentia#miedo#fortaleza#agotamiento#entusiasmo#apatia#arrogancia#humillacion#apego#dependenciaEmocional#	tension	aburrimiento	alegria	deseo	humillacion	malestar	tristeza	certeza	fortaleza	apatia	entusiasmo	calma	duda	placer	amor	valentia	diversion	dolor	frustracion	agotamiento	agrado	dependenciaEmocional	compasion	satisfaccion	apego	miedo	arrogancia	ira	fobia	odio	0	0	Over 23
2021-04-26	calma#tension#duda#compasion#aburrimiento#agrado#tristeza#valentia#dependenciaEmocional#	tension	aburrimiento					tristeza					calma	duda			valentia					agrado	dependenciaEmocional	compasion								0	0	Over 23
2021-04-26	calma#tension#duda#diversion#aburrimiento#agrado#agotamiento#	tension	aburrimiento										calma	duda				diversion			agotamiento	agrado										0	0	Over 23
2021-05-10	calma#tristeza#amor#							tristeza					calma			amor																0	0	Over 23
2021-05-10	certeza#alegria#fortaleza#apatia#			alegria					certeza	fortaleza	apatia																					0	0	Over 23
2021-05-10	certeza#compasion#diversion#alegria#placer#frustracion#deseo#amor#valentia#humillacion#			alegria	deseo	humillacion			certeza						placer	amor	valentia	diversion		frustracion				compasion								0	0	Over 23
2021-05-24	compasion#aburrimiento#tristeza#odio#		aburrimiento					tristeza																compasion							odio	0	0	Over 23
2021-06-07	diversion#agrado#alegria#			alegria														diversion				agrado										0	0	Over 23
2021-04-26	diversion#agrado#alegria#deseo#amor#entusiasmo#			alegria	deseo							entusiasmo				amor		diversion				agrado										0	0	Over 23
2021-05-10	diversion#agrado#alegria#satisfaccion#deseo#amor#			alegria	deseo											amor		diversion				agrado			satisfaccion							0	0	Over 23
2021-06-07	diversion#alegria#amor#odio#miedo#			alegria												amor		diversion									miedo				odio	0	0	Over 23
2021-05-10	diversion#alegria#amor#valentia#			alegria												amor	valentia	diversion														0	0	Over 23
2021-06-07	diversion#alegria#amor#valentia#			alegria												amor	valentia	diversion														0	0	Over 23
2021-04-26	diversion#alegria#deseo#amor#valentia#fortaleza#entusiasmo#			alegria	deseo					fortaleza		entusiasmo				amor	valentia	diversion														0	0	Over 23
2021-05-10	duda#aburrimiento#miedo#agotamiento#		aburrimiento											duda							agotamiento						miedo					0	0	Over 23
2021-05-24	duda#ira#malestar#tristeza#dolor#frustracion#deseo#odio#miedo#agotamiento#humillacion#				deseo	humillacion	malestar	tristeza						duda					dolor	frustracion	agotamiento						miedo		ira		odio	0	0	Over 23
2021-04-26	duda#malestar#alegria#			alegria			malestar							duda																		0	0	Over 23
2021-06-07	fobia#																													fobia		0	0	Over 23
2021-06-07	ira#																												ira			0	0	Over 23
2021-06-04	malestar#alegria#			alegria			malestar																									0	0	Over 23
2021-04-26	malestar#tristeza#dolor#frustracion#fobia#humillacion#					humillacion	malestar	tristeza											dolor	frustracion										fobia		0	0	Over 23
2021-05-24	odio#																														odio	0	0	Over 23
2021-05-10	satisfaccion#																								satisfaccion							0	0	Over 23
2021-04-26	tension#alegria#	tension		alegria																												0	0	Over 23
2021-04-26	tension#alegria#deseo#	tension		alegria	deseo																											0	0	Over 23
2021-04-26	tension#certeza#compasion#aburrimiento#agrado#tristeza#placer#dolor#satisfaccion#frustracion#deseo#amor#valentia#agotamiento#apatia#humillacion#dependenciaEmocional#	tension	aburrimiento		deseo	humillacion		tristeza	certeza		apatia				placer	amor	valentia		dolor	frustracion	agotamiento	agrado	dependenciaEmocional	compasion	satisfaccion							0	0	Over 23
2021-05-10	tension#certeza#ira#diversion#aburrimiento#agrado#alegria#placer#dolor#satisfaccion#fobia#odio#miedo#fortaleza#entusiasmo#humillacion#apego#dependenciaEmocional#	tension	aburrimiento	alegria		humillacion			certeza	fortaleza		entusiasmo			placer			diversion	dolor			agrado	dependenciaEmocional		satisfaccion	apego	miedo		ira	fobia	odio	0	0	Over 23
2021-05-24	tension#compasion#aburrimiento#alegria#placer#frustracion#deseo#odio#agotamiento#entusiasmo#dependenciaEmocional#	tension	aburrimiento	alegria	deseo							entusiasmo			placer					frustracion	agotamiento		dependenciaEmocional	compasion							odio	0	0	Over 23
2021-04-26	tension#duda#aburrimiento#tristeza#dolor#frustracion#fobia#odio#miedo#agotamiento#	tension	aburrimiento					tristeza						duda					dolor	frustracion	agotamiento						miedo			fobia	odio	0	0	Over 23
2021-04-26	tension#duda#compasion#ira#aburrimiento#tristeza#dolor#frustracion#deseo#fobia#amor#odio#agotamiento#apatia#dependenciaEmocional#	tension	aburrimiento		deseo			tristeza			apatia			duda		amor			dolor	frustracion	agotamiento		dependenciaEmocional	compasion					ira	fobia	odio	0	0	Over 23
2021-05-10	tension#duda#ira#aburrimiento#agrado#alegria#placer#satisfaccion#deseo#odio#miedo#fortaleza#entusiasmo#arrogancia#	tension	aburrimiento	alegria	deseo					fortaleza		entusiasmo		duda	placer							agrado			satisfaccion		miedo	arrogancia	ira		odio	0	0	Over 23
2021-05-10	tension#duda#ira#malestar#alegria#tristeza#deseo#amor#odio#miedo#	tension		alegria	deseo		malestar	tristeza						duda		amor											miedo		ira		odio	0	0	Over 23
2021-05-10	tension#placer#valentia#	tension													placer		valentia															0	0	Over 23
2021-05-10	tristeza#							tristeza																								0	0	Over 23
2021-06-07	tristeza#dolor#frustracion#odio#agotamiento#apatia#dependenciaEmocional#							tristeza			apatia								dolor	frustracion	agotamiento		dependenciaEmocional								odio	0	0	Over 23
2021-04-12	aburrimiento#malestar#tristeza#dolor#frustracion#odio#valentia#agotamiento#apatia#arrogancia#dependenciaEmocional#		aburrimiento				malestar	tristeza			apatia						valentia		dolor	frustracion	agotamiento		dependenciaEmocional					arrogancia			odio	0	0	Over 23
2021-04-12	alegria#			alegria																												0	0	Over 23
2021-04-12	calma#aburrimiento#alegria#		aburrimiento	alegria									calma																			0	0	Over 23
2021-04-12	calma#agrado#alegria#amor#			alegria									calma			amor						agrado										0	0	Over 23
2021-04-12	calma#agrado#alegria#amor#valentia#entusiasmo#			alegria								entusiasmo	calma			amor	valentia					agrado										0	0	Over 23
2021-04-12	calma#alegria#			alegria									calma																			0	0	Over 23
2021-04-12	calma#certeza#alegria#placer#agotamiento#			alegria					certeza				calma		placer						agotamiento											0	0	Over 23
2021-04-12	calma#certeza#compasion#diversion#aburrimiento#agrado#alegria#placer#satisfaccion#deseo#amor#valentia#fortaleza#entusiasmo#arrogancia#apego#		aburrimiento	alegria	deseo				certeza	fortaleza		entusiasmo	calma		placer	amor	valentia	diversion				agrado		compasion	satisfaccion	apego		arrogancia				0	0	Over 23
2021-04-12	calma#certeza#compasion#diversion#malestar#tristeza#dolor#satisfaccion#frustracion#deseo#odio#miedo#agotamiento#apatia#humillacion#apego#				deseo	humillacion	malestar	tristeza	certeza		apatia		calma					diversion	dolor	frustracion	agotamiento			compasion	satisfaccion	apego	miedo				odio	0	0	Over 23
2021-04-12	calma#certeza#diversion#aburrimiento#agrado#alegria#satisfaccion#valentia#fortaleza#agotamiento#entusiasmo#		aburrimiento	alegria					certeza	fortaleza		entusiasmo	calma				valentia	diversion			agotamiento	agrado			satisfaccion							0	0	Over 23
2021-04-12	calma#compasion#alegria#placer#			alegria									calma		placer									compasion								0	0	Over 23
2021-04-12	calma#diversion#aburrimiento#		aburrimiento										calma					diversion														0	0	Over 23
2021-04-12	calma#diversion#alegria#			alegria									calma					diversion														0	0	Over 23
2021-04-12	calma#duda#aburrimiento#agotamiento#dependenciaEmocional#		aburrimiento										calma	duda							agotamiento		dependenciaEmocional									0	0	Over 23
2021-04-12	calma#duda#compasion#aburrimiento#alegria#placer#entusiasmo#		aburrimiento	alegria								entusiasmo	calma	duda	placer									compasion								0	0	Over 23
2021-04-12	calma#duda#compasion#aburrimiento#alegria#satisfaccion#deseo#entusiasmo#apego#		aburrimiento	alegria	deseo							entusiasmo	calma	duda										compasion	satisfaccion	apego						0	0	Over 23
2021-04-12	calma#duda#compasion#aburrimiento#alegria#satisfaccion#entusiasmo#		aburrimiento	alegria								entusiasmo	calma	duda										compasion	satisfaccion							0	0	Over 23
2021-04-12	calma#duda#ira#diversion#agrado#alegria#placer#frustracion#deseo#amor#valentia#agotamiento#entusiasmo#arrogancia#dependenciaEmocional#			alegria	deseo							entusiasmo	calma	duda	placer	amor	valentia	diversion		frustracion	agotamiento	agrado	dependenciaEmocional					arrogancia	ira			0	0	Over 23
2021-04-12	calma#duda#placer#												calma	duda	placer																	0	0	Over 23
2021-04-12	deseo#amor#				deseo											amor																0	0	Over 23
2021-04-12	diversion#alegria#satisfaccion#amor#valentia#agotamiento#entusiasmo#			alegria								entusiasmo				amor	valentia	diversion			agotamiento				satisfaccion							0	0	Over 23
2021-04-12	duda#compasion#diversion#agrado#alegria#tristeza#frustracion#deseo#amor#miedo#agotamiento#entusiasmo#arrogancia#apego#dependenciaEmocional#			alegria	deseo			tristeza				entusiasmo		duda		amor		diversion		frustracion	agotamiento	agrado	dependenciaEmocional	compasion		apego	miedo	arrogancia				0	0	Over 23
2021-04-12	ira#agotamiento#apatia#										apatia										agotamiento								ira			0	0	Over 23
2021-04-12	tension#	tension																														0	0	Over 23
2021-04-12	tension#aburrimiento#alegria#deseo#humillacion#	tension	aburrimiento	alegria	deseo	humillacion																										0	0	Over 23
2021-04-12	tension#aburrimiento#malestar#tristeza#dolor#frustracion#fobia#odio#miedo#agotamiento#apatia#dependenciaEmocional#	tension	aburrimiento				malestar	tristeza			apatia								dolor	frustracion	agotamiento		dependenciaEmocional				miedo			fobia	odio	0	0	Over 23
2021-04-12	tension#agrado#alegria#entusiasmo#	tension		alegria								entusiasmo										agrado										0	0	Over 23
2021-04-12	tension#agrado#alegria#entusiasmo#arrogancia#	tension		alegria								entusiasmo										agrado						arrogancia				0	0	Over 23
2021-04-12	tension#agrado#alegria#valentia#entusiasmo#	tension		alegria								entusiasmo					valentia					agrado										0	0	Over 23
2021-04-12	tension#certeza#compasion#diversion#agrado#alegria#placer#satisfaccion#miedo#agotamiento#entusiasmo#dependenciaEmocional#	tension		alegria					certeza			entusiasmo			placer			diversion			agotamiento	agrado	dependenciaEmocional	compasion	satisfaccion		miedo					0	0	Over 23
2021-04-12	tension#duda#aburrimiento#malestar#alegria#tristeza#placer#frustracion#fobia#agotamiento#dependenciaEmocional#	tension	aburrimiento	alegria			malestar	tristeza						duda	placer					frustracion	agotamiento		dependenciaEmocional							fobia		0	0	Over 23
2021-04-12	tension#duda#compasion#tristeza#frustracion#deseo#agotamiento#dependenciaEmocional#	tension			deseo			tristeza						duda						frustracion	agotamiento		dependenciaEmocional	compasion								0	0	Over 23
2021-04-12	tension#tristeza#placer#satisfaccion#deseo#amor#agotamiento#dependenciaEmocional#	tension			deseo			tristeza							placer	amor					agotamiento		dependenciaEmocional		satisfaccion							0	0	Over 23
2021-04-12	tristeza#dolor#fobia#amor#valentia#miedo#apatia#							tristeza			apatia					amor	valentia		dolor								miedo			fobia		0	0	Over 23
2021-05-10	calma#aburrimiento#		aburrimiento										calma																			0	0	Over 23
2021-04-26	alegria#satisfaccion#			alegria																					satisfaccion							0	0	Over 23
2021-06-07	compasion#tristeza#							tristeza																compasion								0	0	Over 23
2021-06-07	compasion#tristeza#							tristeza																compasion								0	0	Over 23
2021-06-07	calma#compasion#diversion#agrado#alegria#			alegria									calma					diversion				agrado		compasion								0	0	Over 23
2021-05-10	agrado#alegria#placer#			alegria											placer							agrado										0	0	Over 23
2021-05-10	compasion#tristeza#							tristeza																compasion								0	0	Over 23
2021-04-26	alegria#			alegria																												0	0	Over 23
2021-04-26	alegria#tristeza#			alegria				tristeza																								0	0	Over 23
2021-04-12	aburrimiento#tristeza#		aburrimiento					tristeza																								0	0	Over 23
2021-04-12	calma#duda#compasion#aburrimiento#alegria#entusiasmo#		aburrimiento	alegria								entusiasmo	calma	duda										compasion								0	0	Over 23
2021-04-12	calma#duda#compasion#aburrimiento#alegria#entusiasmo#		aburrimiento	alegria								entusiasmo	calma	duda										compasion								0	0	Over 23
2021-04-12	calma#duda#compasion#aburrimiento#alegria#entusiasmo#		aburrimiento	alegria								entusiasmo	calma	duda										compasion								0	0	Over 23
2021-04-12	calma#duda#compasion#aburrimiento#alegria#placer#entusiasmo#		aburrimiento	alegria								entusiasmo	calma	duda	placer									compasion								0	0	Over 23
2021-04-26	malestar#tristeza#						malestar	tristeza																								0	0	Over 23
2021-04-26	tension#duda#aburrimiento#frustracion#	tension	aburrimiento											duda						frustracion												0	0	Over 23
2021-04-26	ira#																												ira			0	0	Over 23
2021-04-26	ira#malestar#						malestar																						ira			0	0	Over 23
2021-04-26	tension#aburrimiento#agotamiento#	tension	aburrimiento																		agotamiento											0	0	Over 23
2021-04-26	alegria#			alegria																												0	0	Over 23
2021-04-26	alegria#agotamiento#			alegria																	agotamiento											0	0	Over 23
2021-04-26	tristeza#frustracion#							tristeza												frustracion												0	0	Over 23
2021-05-10	duda#ira#frustracion#													duda						frustracion									ira			0	0	Over 23
2021-05-10	duda#ira#frustracion#													duda						frustracion									ira			0	0	Over 23
2021-05-10	calma#												calma																			0	0	Over 23
2021-05-10	calma#												calma																			0	0	Over 23
2021-04-26	alegria#amor#			alegria												amor																0	0	Over 23
2021-05-10	agrado#satisfaccion#																					agrado			satisfaccion							0	0	Over 23
2021-05-10	fortaleza#									fortaleza																						0	0	Over 23
2021-04-26	tension#certeza#ira#aburrimiento#agrado#tristeza#placer#dolor#satisfaccion#deseo#odio#valentia#agotamiento#apatia#arrogancia#	tension	aburrimiento		deseo			tristeza	certeza		apatia				placer		valentia		dolor		agotamiento	agrado			satisfaccion			arrogancia	ira		odio	0	0	Over 23
2021-06-07	placer#arrogancia#														placer													arrogancia				0	0	Over 23
2021-06-07	tristeza#							tristeza																								0	0	Over 23
2021-06-07	frustracion#fobia#																			frustracion										fobia		0	0	Over 23
2021-06-07	frustracion#fobia#																			frustracion										fobia		0	0	Over 23
2021-06-07	calma#												calma																			0	0	Over 23
2021-06-07	calma#												calma																			0	0	Over 23
2021-04-26	tristeza#placer#satisfaccion#deseo#amor#				deseo			tristeza							placer	amor									satisfaccion							0	0	Over 23
2021-04-26	alegria#			alegria																												0	0	Over 23
2021-05-10	alegria#entusiasmo#			alegria								entusiasmo																				0	0	Over 23
2021-05-10	alegria#entusiasmo#			alegria								entusiasmo																				0	0	Over 23
2021-05-10	alegria#frustracion#			alegria																frustracion												0	0	Over 23
2021-04-26	malestar#alegria#tristeza#			alegria			malestar	tristeza																								0	0	Over 23
2021-04-26	malestar#alegria#tristeza#			alegria			malestar	tristeza																								0	0	Over 23
2021-04-26	aburrimiento#malestar#dolor#		aburrimiento				malestar												dolor													0	0	Over 23
2021-05-10	aburrimiento#alegria#amor#		aburrimiento	alegria												amor																0	0	Over 23
2021-05-10	tension#diversion#aburrimiento#placer#frustracion#	tension	aburrimiento												placer			diversion		frustracion												0	0	Over 23
2021-06-07	diversion#amor#															amor		diversion														0	0	Over 23
2021-06-07	alegria#tristeza#			alegria				tristeza																								0	0	Over 23
2021-06-07	entusiasmo#											entusiasmo																				0	0	Over 23
2021-06-07	certeza#alegria#			alegria					certeza																							0	0	Over 23
2021-06-07	certeza#alegria#			alegria					certeza																							0	0	Over 23
2021-06-07	certeza#apatia#								certeza		apatia																					0	0	Over 23
2021-06-07	ira#malestar#tristeza#odio#miedo#						malestar	tristeza																			miedo		ira		odio	0	0	Over 23
2021-05-10	aburrimiento#		aburrimiento																													0	0	Over 23
2021-05-24	alegria#valentia#			alegria													valentia															0	0	Over 23
2021-05-10	tension#frustracion#	tension																		frustracion												0	0	Over 23
2021-04-12	tristeza#placer#deseo#amor#humillacion#				deseo	humillacion		tristeza							placer	amor																0	0	Over 23
2021-06-07	tension#tristeza#	tension						tristeza																								0	0	Over 23
2021-06-07	tension#tristeza#amor#	tension						tristeza								amor																0	0	Over 23
2021-05-10	certeza#compasion#dolor#								certeza										dolor					compasion								0	0	Over 23
2021-04-26	tristeza#							tristeza																								0	0	Over 23
2021-05-24	certeza#alegria#			alegria					certeza																							0	0	Over 23
2021-06-07	calma#												calma																			0	0	Over 23
2021-05-10	frustracion#																			frustracion												0	0	Over 23
2021-05-10	frustracion#																			frustracion												0	0	Over 23
2021-05-10	frustracion#																			frustracion												0	0	Over 23
2021-05-10	frustracion#																			frustracion												0	0	Over 23
2021-04-12	certeza#tristeza#frustracion#							tristeza	certeza											frustracion												0	0	Over 23
2021-05-10	malestar#						malestar																									0	0	Over 23
2021-05-24	agrado#alegria#			alegria																		agrado										0	0	Over 23
2021-05-24	calma#tension#certeza#duda#compasion#ira#diversion#aburrimiento#agrado#malestar#alegria#tristeza#placer#dolor#satisfaccion#frustracion#deseo#fobia#amor#odio#valentia#miedo#fortaleza#agotamiento#entusiasmo#apatia#arrogancia#humillacion#apego#dependenciaEmocional#	tension	aburrimiento	alegria	deseo	humillacion	malestar	tristeza	certeza	fortaleza	apatia	entusiasmo	calma	duda	placer	amor	valentia	diversion	dolor	frustracion	agotamiento	agrado	dependenciaEmocional	compasion	satisfaccion	apego	miedo	arrogancia	ira	fobia	odio	0	0	Over 23
2021-04-26	tristeza#							tristeza																								0	0	Over 23
2021-04-26	tristeza#							tristeza																								0	0	Over 23
2021-04-26	alegria#tristeza#frustracion#agotamiento#			alegria				tristeza												frustracion	agotamiento											0	0	Over 23
2021-06-07	ira#alegria#amor#odio#entusiasmo#			alegria								entusiasmo				amor													ira		odio	0	0	Over 23
2021-04-26	malestar#tristeza#dolor#humillacion#					humillacion	malestar	tristeza											dolor													0	0	Over 23
2021-04-26	malestar#tristeza#dolor#humillacion#					humillacion	malestar	tristeza											dolor													0	0	Over 23
2021-04-26	alegria#			alegria																												0	0	Over 23
2021-05-10	calma#tension#duda#ira#diversion#malestar#alegria#placer#dolor#satisfaccion#deseo#odio#valentia#fortaleza#entusiasmo#arrogancia#apego#	tension		alegria	deseo		malestar			fortaleza		entusiasmo	calma	duda	placer		valentia	diversion	dolor						satisfaccion	apego		arrogancia	ira		odio	0	0	Over 23
2021-05-10	compasion#alegria#tristeza#placer#dolor#deseo#amor#odio#valentia#miedo#entusiasmo#apatia#			alegria	deseo			tristeza			apatia	entusiasmo			placer	amor	valentia		dolor					compasion			miedo				odio	0	0	Over 23
2021-05-10	calma#agrado#tristeza#dolor#amor#							tristeza					calma			amor			dolor			agrado										0	0	Over 23
2021-05-24	calma#agrado#alegria#			alegria									calma									agrado										0	0	Over 23
2021-05-10	calma#compasion#aburrimiento#alegria#		aburrimiento	alegria									calma											compasion								0	0	Over 23
2021-04-26	calma#diversion#agrado#alegria#amor#valentia#			alegria									calma			amor	valentia	diversion				agrado										0	0	Over 23
2021-04-12	calma#agrado#alegria#placer#entusiasmo#			alegria								entusiasmo	calma		placer							agrado										0	0	Over 23
2021-05-10	compasion#alegria#			alegria																				compasion								0	0	Over 23
2021-05-10	compasion#alegria#			alegria																				compasion								0	0	Over 23
2021-04-26	alegria#			alegria																												0	0	Over 23
2021-04-26	alegria#agotamiento#			alegria																	agotamiento											0	0	Over 23
2021-04-26	alegria#agotamiento#			alegria																	agotamiento											0	0	Over 23
2021-04-26	alegria#agotamiento#			alegria																	agotamiento											0	0	Over 23
2021-04-26	diversion#alegria#placer#entusiasmo#			alegria								entusiasmo			placer			diversion														0	0	Over 23
2021-06-16	miedo#apatia#humillacion#					humillacion					apatia																miedo					0	0	Over 23
2021-05-24	aburrimiento#malestar#frustracion#odio#agotamiento#		aburrimiento				malestar													frustracion	agotamiento										odio	0	0	Over 23
2021-05-24	calma#aburrimiento#agotamiento#		aburrimiento										calma								agotamiento											0	0	Over 23
2021-04-26	certeza#diversion#dependenciaEmocional#								certeza									diversion					dependenciaEmocional									0	0	Over 23
2021-05-10	frustracion#																			frustracion												0	0	Over 23
2021-05-10	humillacion#					humillacion																										0	0	Over 23
2021-06-07	tension#duda#aburrimiento#malestar#tristeza#miedo#agotamiento#	tension	aburrimiento				malestar	tristeza						duda							agotamiento						miedo					0	0	Over 23
2021-04-12	calma#aburrimiento#		aburrimiento										calma																			0	0	Over 23
2021-04-12	calma#certeza#compasion#diversion#agrado#alegria#satisfaccion#deseo#amor#valentia#fortaleza#dependenciaEmocional#			alegria	deseo				certeza	fortaleza			calma			amor	valentia	diversion				agrado	dependenciaEmocional	compasion	satisfaccion							0	0	Over 23
2021-04-12	tension#duda#ira#aburrimiento#malestar#tristeza#dolor#frustracion#fobia#odio#miedo#agotamiento#apatia#humillacion#apego#	tension	aburrimiento			humillacion	malestar	tristeza			apatia			duda					dolor	frustracion	agotamiento					apego	miedo		ira	fobia	odio	0	0	Over 23
2021-04-26	agrado#alegria#arrogancia#			alegria																		agrado						arrogancia				0	0	Over 23
2021-05-24	ira#aburrimiento#		aburrimiento																										ira			0	0	Over 23
2021-06-07	malestar#frustracion#						malestar													frustracion												0	0	Over 23
2021-05-10	tension#duda#miedo#	tension												duda													miedo					0	0	Over 23
2021-05-10	calma#												calma																			0	0	Over 23
2021-05-24	calma#												calma																			0	0	Over 23
2021-06-07	calma#												calma																			0	0	Over 23
2021-04-26	calma#aburrimiento#		aburrimiento										calma																			0	0	Over 23
2021-05-10	calma#diversion#												calma					diversion														0	0	Over 23
2021-04-12	calma#diversion#												calma					diversion														0	0	Over 23
2021-05-24	calma#duda#												calma	duda																		0	0	Over 23
2021-06-07	agrado#alegria#			alegria																		agrado										0	0	Over 23
2021-05-10	calma#diversion#												calma					diversion														0	0	Over 23
		240	238	489	194	81	145	195	135	154	94	210	491	263	151	242	154	249	108	213	288	312	92	175	184	106	126	85	93	42	75

## Sheet: Inf_initial_emotions
Dynamic table extracted from the "InitialEmotions" table to show the graphs of the emotions most "selected" by users when starting sessions in CuentosIE
	Emotional categories
	# tension	# fobia	# aburrimiento	# humillacion	# malestar	# tristeza	# apatia	# duda	# dolor	# frustracion	# odio	# agotamiento	# dependenciaEmocional	# apego	# miedo	# arrogancia	# ira	# alegria	# deseo	# certeza	# fortaleza	# entusiasmo	# calma	# placer	# amor	# valentia	# diversion	# agrado	# compasion	# satisfaccion	Total
0	13	4	12	8	8	18	7	13	9	14	5	14	7	7	8	2	3	27	9	6	5	10	26	8	11	4	14	11	7	6	296
Over 23	13	4	12	8	8	18	7	13	9	14	5	14	7	7	8	2	3	27	9	6	5	10	26	8	11	4	14	11	7	6	296
female	159	18	140	35	89	117	59	160	48	114	38	171	49	41	78	21	42	227	73	37	59	87	233	44	138	59	92	147	61	64	2700
From 18 to 23	69	4	16	9	22	34	15	52	13	29	7	52	9	20	27	5	8	43	19	8	26	25	51	11	45	17	23	32	23	24	738
Over 23	22	1	3	1	5	9	5	16	1	14		21		1	8		2	17	7	2	5	13	13	1	12	9	3	7	1	9	208
Under 18	68	13	121	25	62	74	39	92	34	71	31	98	40	20	43	16	32	167	47	27	28	49	169	32	81	33	66	108	37	31	1754
male	68	20	86	38	48	60	28	90	51	85	32	103	36	58	40	62	48	235	112	92	90	113	232	99	93	91	143	154	107	114	2628
From 18 to 23	10	1			1	2	1	8		4	3	7	3	3	7	3	2	16	7	4	5	9	16	7	10	2	7	9	8	9	164
Over 23	11		1	3	2	5	6	8	6	8		6	1	1	5	3	1	7	2	1	3	4	5	3	3	4	4	4	6	3	116
Under 18	47	19	85	35	45	53	21	74	45	73	29	90	32	54	28	56	45	212	103	87	82	100	211	89	80	85	132	141	93	102	2348
Total general	240	42	238	81	145	195	94	263	108	213	75	288	92	106	126	85	93	489	194	135	154	210	491	151	242	154	249	312	175	184	5624
Positive emotions	3140	0.558321
Negative emotions	2484	0.441679
Total	5624
	tension	fobia	aburrimiento	humillacion	malestar	tristeza	apatia	duda	dolor	frustracion	odio	agotamiento	dependenciaEmocional	apego	miedo	arrogancia	ira	alegria	deseo	certeza	fortaleza	entusiasmo	calma	placer	amor	valentia	diversion	agrado	compasion	satisfaccion	Total
No gender	13	4	12	8	8	18	7	13	9	14	5	14	7	7	8	2	3	27	9	6	5	10	26	8	11	4	14	11	7	6	296
Over 23	13	4	12	8	8	18	7	13	9	14	5	14	7	7	8	2	3	27	9	6	5	10	26	8	11	4	14	11	7	6	296
female	159	18	140	35	89	117	59	160	48	114	38	171	49	41	78	21	42	227	73	37	59	87	233	44	138	59	92	147	61	64	2700
From 18 to 23	69	4	16	9	22	34	15	52	13	29	7	52	9	20	27	5	8	43	19	8	26	25	51	11	45	17	23	32	23	24	738
Over 23	22	1	3	1	5	9	5	16	1	14		21		1	8		2	17	7	2	5	13	13	1	12	9	3	7	1	9	208
Under 18	68	13	121	25	62	74	39	92	34	71	31	98	40	20	43	16	32	167	47	27	28	49	169	32	81	33	66	108	37	31	1754
male	68	20	86	38	48	60	28	90	51	85	32	103	36	58	40	62	48	235	112	92	90	113	232	99	93	91	143	154	107	114	2628
From 18 to 23	10	1			1	2	1	8		4	3	7	3	3	7	3	2	16	7	4	5	9	16	7	10	2	7	9	8	9	164
Over 23	11		1	3	2	5	6	8	6	8		6	1	1	5	3	1	7	2	1	3	4	5	3	3	4	4	4	6	3	116
Under 18	47	19	85	35	45	53	21	74	45	73	29	90	32	54	28	56	45	212	103	87	82	100	211	89	80	85	132	141	93	102	2348
Total	240	42	238	81	145	195	94	263	108	213	75	288	92	106	126	85	93	489	194	135	154	210	491	151	242	154	249	312	175	184	5624
	Tension	Phobia	Boredom	Humiliation	Discomfort	Sadness	Apathy	Doubt	Pain	Frustration	Hatred	Exhaustion	Em.Depend.	Attachment	Fear	Arrogance	Anger	Joy	Desire	Certainty	Strength	Enthusiasm	Calm	Pleasure	Love	Courage	Fun	Liking	Compassion	Satisfaction
No gender	0.0439189	0.0135135	0.0405405	0.027027	0.027027	0.0608108	0.0236486	0.0439189	0.0304054	0.0472973	0.0168919	0.0472973	0.0236486	0.0236486	0.027027	0.00675676	0.0101351	0.0912162	0.0304054	0.0202703	0.0168919	0.0337838	0.0878378	0.027027	0.0371622	0.0135135	0.0472973	0.0371622	0.0236486	0.0202703
Over 23	0.0439189	0.0135135	0.0405405	0.027027	0.027027	0.0608108	0.0236486	0.0439189	0.0304054	0.0472973	0.0168919	0.0472973	0.0236486	0.0236486	0.027027	0.00675676	0.0101351	0.0912162	0.0304054	0.0202703	0.0168919	0.0337838	0.0878378	0.027027	0.0371622	0.0135135	0.0472973	0.0371622	0.0236486	0.0202703
Female	0.0588889	0.00666667	0.0518519	0.012963	0.032963	0.0433333	0.0218519	0.0592593	0.0177778	0.0422222	0.0140741	0.0633333	0.0181481	0.0151852	0.0288889	0.00777778	0.0155556	0.0840741	0.027037	0.0137037	0.0218519	0.0322222	0.0862963	0.0162963	0.0511111	0.0218519	0.0340741	0.0544444	0.0225926	0.0237037
From 18 to 23	0.0934959	0.00542005	0.0216802	0.0121951	0.0298103	0.0460705	0.0203252	0.0704607	0.0176152	0.0392954	0.00948509	0.0704607	0.0121951	0.0271003	0.0365854	0.00677507	0.0108401	0.0582656	0.0257453	0.0108401	0.0352304	0.0338753	0.0691057	0.0149051	0.0609756	0.0230352	0.0311653	0.0433604	0.0311653	0.0325203
Over 23	0.105769	0.00480769	0.0144231	0.00480769	0.0240385	0.0432692	0.0240385	0.0769231	0.00480769	0.0673077	0	0.100962	0	0.00480769	0.0384615	0	0.00961538	0.0817308	0.0336538	0.00961538	0.0240385	0.0625	0.0625	0.00480769	0.0576923	0.0432692	0.0144231	0.0336538	0.00480769	0.0432692
Under 18	0.0387685	0.00741163	0.0689852	0.0142531	0.0353478	0.0421893	0.0222349	0.0524515	0.0193843	0.0404789	0.0176739	0.0558723	0.022805	0.0114025	0.0245154	0.00912201	0.018244	0.0952109	0.0267959	0.0153934	0.0159635	0.0279361	0.0963512	0.018244	0.0461802	0.0188141	0.0376283	0.0615735	0.0210946	0.0176739
Male	0.0258752	0.00761035	0.0327245	0.0144597	0.0182648	0.0228311	0.0106545	0.0342466	0.0194064	0.032344	0.0121766	0.0391933	0.0136986	0.02207	0.0152207	0.0235921	0.0182648	0.0894216	0.042618	0.0350076	0.0342466	0.0429985	0.0882801	0.0376712	0.0353881	0.0346271	0.054414	0.0585997	0.0407154	0.043379
From 18 to 23	0.0609756	0.00609756	0	0	0.00609756	0.0121951	0.00609756	0.0487805	0	0.0243902	0.0182927	0.0426829	0.0182927	0.0182927	0.0426829	0.0182927	0.0121951	0.097561	0.0426829	0.0243902	0.0304878	0.054878	0.097561	0.0426829	0.0609756	0.0121951	0.0426829	0.054878	0.0487805	0.054878
Over 23	0.0948276	0	0.00862069	0.0258621	0.0172414	0.0431034	0.0517241	0.0689655	0.0517241	0.0689655	0	0.0517241	0.00862069	0.00862069	0.0431034	0.0258621	0.00862069	0.0603448	0.0172414	0.00862069	0.0258621	0.0344828	0.0431034	0.0258621	0.0258621	0.0344828	0.0344828	0.0344828	0.0517241	0.0258621
Under 18	0.020017	0.00809199	0.036201	0.0149063	0.0191652	0.0225724	0.00894378	0.0315162	0.0191652	0.0310903	0.0123509	0.0383305	0.0136286	0.0229983	0.011925	0.0238501	0.0191652	0.0902896	0.0438671	0.0370528	0.0349233	0.0425894	0.0898637	0.0379046	0.0340716	0.036201	0.0562181	0.0600511	0.0396082	0.0434412

## Sheet: confusionMatrixEmotions
Confusion matrix of the SVM classifier on the test corpus of 284 questions
	boredom	exhaustion	liking	joy	love	apathy	arrogance	calm	certainty	compassion	desire	fun	pain	doubt	enthusiasm	phobia	strength	frustration	humiliation	anger	discomfort	fear	hatred	pleasure	satisfaction	tension	sadness	courage
boredom	7	9	0	0	0	3	0	0	0	0	0	0	0	1	0	0	0	0	0	0	1	0	0	0	0	0	0	0
exhaustion	0	21	0	0	0	1	0	0	0	0	0	0	0	0	0	0	0	0	0	0	1	0	0	0	0	1	1	0
liking	0	0	11	26	0	0	0	1	5	0	0	0	0	0	1	0	0	0	0	0	0	0	0	15	4	0	1	0
joy	0	0	3	81	0	0	0	1	5	0	0	0	0	0	2	0	0	0	0	0	0	0	0	17	4	0	1	0
love	0	0	1	2	11	0	0	0	2	0	0	1	0	0	0	0	0	0	0	0	0	0	0	0	0	0	0	0
apathy	1	8	0	0	0	9	0	0	0	0	0	0	0	1	0	0	0	0	0	0	1	0	0	0	0	0	0	0
arrogance	0	0	0	0	0	0	33	0	0	0	0	0	0	0	0	0	0	0	0	0	1	1	0	0	0	0	0	0
calm	0	0	0	1	0	0	0	10	0	0	0	0	0	0	0	0	0	0	0	0	0	0	0	1	0	0	0	0
certainty	0	0	3	21	2	0	0	3	25	0	0	0	0	0	2	0	0	0	0	0	1	1	0	13	4	1	1	0
compassion	0	0	0	1	0	0	0	0	0	6	0	0	0	0	0	0	0	0	0	0	0	0	0	1	0	0	0	0
desire	0	0	0	1	1	0	0	1	1	0	7	0	0	0	0	0	0	0	0	0	0	0	0	1	0	0	0	0
fun	0	0	1	2	1	0	0	0	1	0	0	6	0	0	1	0	0	0	0	0	1	0	0	0	0	0	0	0
pain	0	2	0	0	0	0	0	0	1	0	0	0	5	0	0	0	0	0	0	1	6	1	0	0	0	3	10	0
doubt	1	0	0	0	0	0	0	0	0	0	0	0	0	12	0	0	0	0	0	0	4	0	0	0	0	1	2	0
enthusiasm	0	0	2	24	0	0	0	1	5	0	0	0	0	0	12	0	0	0	0	0	0	0	0	16	4	0	1	0
phobia	0	0	0	0	0	0	0	0	0	0	0	0	0	0	0	6	0	0	0	0	0	1	0	0	0	0	0	0
strength	0	0	0	0	0	0	0	0	2	0	0	0	0	0	0	0	6	0	0	0	1	0	0	0	0	0	0	0
frustration	0	2	0	0	0	0	0	0	1	0	0	0	0	1	0	0	0	44	0	1	14	1	0	0	0	2	13	0
humiliation	0	0	0	0	0	0	0	0	0	0	0	0	0	0	0	0	0	0	5	0	3	0	0	0	0	0	0	0
anger	0	0	0	0	0	0	0	0	0	0	0	0	0	0	0	0	0	0	0	41	4	0	0	0	0	0	2	0
discomfort	0	4	0	0	0	1	0	0	1	0	0	0	0	1	0	0	0	1	0	1	50	2	0	0	0	4	14	0
fear	0	0	0	0	0	0	0	0	0	0	0	0	0	1	0	0	0	0	0	0	4	48	0	0	0	0	1	0
hatred	0	0	0	0	0	0	0	0	0	0	0	0	0	0	0	0	0	0	0	0	0	0	6	0	0	0	0	0
pleasure	0	0	3	22	0	0	0	1	5	0	0	1	0	0	1	0	0	0	0	0	0	0	0	23	4	0	1	0
satisfaction	0	0	3	23	0	0	0	1	7	0	0	0	0	0	1	0	0	0	0	0	0	0	0	15	11	0	1	0
tension	0	2	0	1	0	0	0	0	1	0	0	0	0	1	0	0	0	1	0	1	10	1	0	0	0	11	4	0
sadness	0	3	0	0	0	1	0	0	1	0	0	0	0	0	0	0	0	2	0	1	10	2	0	0	0	2	63	0
courage	0	0	0	0	0	0	0	0	1	0	0	0	0	0	0	0	0	0	0	0	1	0	0	0	0	0	0	5

## Sheet: EmotionPrecision
Accuracy of the SVM classifier on the test corpus of 284 questions
Emotion	Precision	Recall	F1-score	Support			Emotion	Precision	Recall	F1-score	Support
boredom	0.78	0.33	0.47	21		aburrimiento	boredom
exhaustion	0.41	0.84	0.55	25		agotamiento	exhaustion
liking	0.41	0.17	0.24	64		agrado	liking
joy	0.4	0.71	0.51	114		alegria	joy
love	0.73	0.65	0.69	17		amor	love
apathy	0.6	0.45	0.51	20		apatia	apathy
arrogance	1	0.94	0.97	35		arrogancia	arrogance
calm	0.53	0.83	0.65	12		calma	calm
certainty	0.39	0.32	0.35	77		certeza	certainty
compassion	1	0.75	0.86	8		compasion	compassion
desire	1	0.58	0.74	12		deseo	desire
fun	0.75	0.46	0.57	13		diversion	fun
pain	1	0.17	0.29	29		dolor	pain
doubt	0.67	0.6	0.63	20		duda	doubt
enthusiasm	0.6	0.18	0.28	65		entusiasmo	enthusiasm
phobia	1	0.86	0.92	7		fobia	phobia
strength	1	0.67	0.8	9		fortaleza	strength
frustration	0.92	0.56	0.69	79		frustracion	frustration
humiliation	1	0.62	0.77	8		humillacion	humiliation
anger	0.89	0.87	0.88	47		ira	anger
discomfort	0.44	0.63	0.52	79		malestar	discomfort
fear	0.83	0.89	0.86	54		miedo	fear
hatred	1	1	1	6		odio	hatred
pleasure	0.23	0.38	0.28	61		placer	pleasure
satisfaction	0.35	0.18	0.24	62		satisfaccion	satisfaction
tension	0.44	0.33	0.38	33		tension	tension
sadness	0.54	0.74	0.63	85		tristeza	sadness
courage	1	0.71	0.83	7		valentia	courage
accuracy	0	0	0.54	1069
macroAvg	0.71	0.59	0.61	1069		Total tests
weightedAvg	0.59	0.54	0.53	1069		1069
#Negations: 77 #Negations_with_antonyms: 25 #WordsNegation: 296 #WordsNegationNoStopWords: 147 #WordsNegationNoStopWordsWithAntonyms: 92
WithNoNegation	Queryid (Num): 256					WithNegation	Queryid (Num): 260				WithoutNegationWithAntonyms		Queryid (Num): 256			Pregunta 7 NO procesada: contFich: ser
	Rel_ret: 203						Rel_ret: 197						Rel_ret: 203			Pregunta 104 NO procesada: contFich: estar
	at 0.00 0.7930						at 0.00 0.7577						at 0.00 0.7930			Pregunta 157 NO procesada: contFich:
																Pregunta 160 NO procesada: contFich:
	********************************************************					********************************************************					********************************************************
	SVM SVM_emociones_python_sinNeg.joblib max_iter= 70000 quitandoPalRarasFrecuentes= False nGramas= (1, 2) corpusTraining= corpusEmociones/corpus_emociones_train_python_sinNeg corpusTest= corpusEmociones/corpus_emociones_test_python_sinNeg					SVM SVM_emociones_python_conNeg.joblib max_iter= 70000 quitandoPalRarasFrecuentes= False nGramas= (1, 2) corpusTraining= corpusEmociones/corpus_emociones_train_python_conNeg corpusTest= corpusEmociones/corpus_emociones_test_python_conNeg					SVM SVM_emociones_python_sinNegConAntonimos.joblib max_iter= 70000 quitandoPalRarasFrecuentes= False nGramas= (1, 2) corpusTraining= corpusEmociones/corpus_emociones_train_python_sinNegConAntonimos corpusTest= corpusEmociones/corpus_emociones_test_python_sinNegConAntonimos
	********************************************************					********************************************************					********************************************************
	precision recall f1-score support					precision recall f1-score support					precision recall f1-score support
	aburrimiento 0.47 0.38 0.42 21					aburrimiento 0.53 0.43 0.47 21					aburrimiento 0.47 0.38 0.42 21
	agotamiento 0.50 0.76 0.60 25					agotamiento 0.47 0.80 0.59 25					agotamiento 0.50 0.76 0.60 25
	agrado 0.40 0.19 0.26 64					agrado 0.44 0.17 0.25 64					agrado 0.35 0.23 0.28 64
	alegria 0.36 0.77 0.49 114					alegria 0.35 0.79 0.48 114					alegria 0.36 0.76 0.49 114
	amor 0.85 0.65 0.73 17					amor 0.85 0.65 0.73 17					amor 0.85 0.65 0.73 17
	apatia 0.60 0.45 0.51 20					apatia 0.67 0.40 0.50 20					apatia 0.60 0.45 0.51 20
	apego 1.00 0.50 0.67 6					apego 0.35 1.00 0.52 6					apego 1.00 0.50 0.67 6
	arrogancia 1.00 0.94 0.97 35					arrogancia 1.00 0.97 0.99 35					arrogancia 1.00 0.94 0.97 35
	calma 0.80 0.67 0.73 12					calma 0.88 0.58 0.70 12					calma 0.80 0.67 0.73 12
	certeza 0.43 0.30 0.35 77					certeza 0.40 0.34 0.37 77					certeza 0.43 0.30 0.35 77
	compasion 1.00 0.75 0.86 8					compasion 1.00 0.75 0.86 8					compasion 1.00 0.75 0.86 8
	dependenciaEmocional 0.56 0.45 0.50 11					dependenciaEmocional 0.56 0.45 0.50 11					dependenciaEmocional 0.56 0.45 0.50 11
	deseo 1.00 0.58 0.74 12					deseo 0.89 0.67 0.76 12					deseo 0.62 0.67 0.64 12
	diversion 0.75 0.46 0.57 13					diversion 0.75 0.46 0.57 13					diversion 0.75 0.46 0.57 13
	dolor 1.00 0.17 0.29 29					dolor 0.67 0.21 0.32 29					dolor 1.00 0.17 0.29 29
	duda 0.67 0.60 0.63 20					duda 0.67 0.60 0.63 20					duda 0.67 0.60 0.63 20
	entusiasmo 0.37 0.25 0.30 65					entusiasmo 0.45 0.22 0.29 65					entusiasmo 0.35 0.26 0.30 65
	fobia 1.00 0.86 0.92 7					fobia 1.00 0.86 0.92 7					fobia 1.00 0.86 0.92 7
	fortaleza 1.00 0.67 0.80 9					fortaleza 1.00 0.67 0.80 9					fortaleza 1.00 0.67 0.80 9
	frustracion 0.70 0.61 0.65 79					frustracion 0.66 0.63 0.65 79					frustracion 0.68 0.62 0.65 79
	humillacion 1.00 0.62 0.77 8					humillacion 1.00 0.62 0.77 8					humillacion 0.50 0.75 0.60 8
	ira 0.89 0.87 0.88 47					ira 0.83 0.94 0.88 47					ira 0.89 0.89 0.89 47
	malestar 0.65 0.49 0.56 79					malestar 0.62 0.54 0.58 79					malestar 0.60 0.54 0.57 79
	miedo 0.81 0.89 0.85 54					miedo 0.80 0.94 0.86 54					miedo 0.82 0.91 0.86 54
	odio 1.00 1.00 1.00 6					odio 1.00 1.00 1.00 6					odio 1.00 1.00 1.00 6
	placer 0.26 0.25 0.25 61					placer 1.00 0.10 0.18 61					placer 0.58 0.11 0.19 61
	satisfaccion 0.41 0.18 0.25 62					satisfaccion 0.26 0.27 0.27 62					satisfaccion 0.29 0.23 0.25 62
	tension 0.48 0.36 0.41 33					tension 0.71 0.30 0.43 33					tension 0.50 0.30 0.38 33
	tristeza 0.44 0.82 0.57 85					tristeza 0.52 0.79 0.63 85					tristeza 0.46 0.80 0.59 85
	valentia 1.00 0.71 0.83 7					valentia 1.00 0.71 0.83 7					valentia 1.00 0.71 0.83 7
	accuracy 0.54 1086					accuracy 0.55 1086					accuracy 0.54 1086
	macro avg 0.71 0.57 0.61 1086					macro avg 0.71 0.60 0.61 1086					macro avg 0.69 0.58 0.60 1086
	weighted avg 0.58 0.54 0.52 1086					weighted avg 0.61 0.55 0.53 1086					weighted avg 0.57 0.54 0.52 1086

## Sheet: Precision
Accuracy of emotion classification system
	Primer Doc	Average precision	A 5 docs	R-Precision	#Answers
Rocío 1	0.7365	0.3908	0.3407	0.3704	229
ConAdv	0.7404	0.3823	0.3311	0.3594
ConAdv.ConSerSentir	0.7231	0.3712	0.32	0.3472
ConAdv.SinNo	0.7404	0.3823	0.3311	0.3594
ConAdv.ConPalFraseBusq	0.7404	0.3823	0.3311	0.3594
SinAdvConBienMal	0.7348	0.3904	0.3409	0.3695
SinAdvConBienMal.ConDefMari	0.7316	0.39	0.3384	0.3685
SinAdvConBienMal.NuevasDefWikipedia	0.723	0.3667	0.3162	0.3814
SinAdvConBienMal.NuevasDefWikipedia.ConNegacYBienSinConjuncion	0.7169	0.3659	0.3127	0.3803	236
indexSinNeg: Anterior Indexando con tratto negacion	0.7196	0.368	0.3161	0.3817
Before with .usuarios	0.7844	0.6586	0.4872	0.6137	250
Before with Rocio	0.7764	0.6473	0.4837	0.6041	251

[truncated: 9 more sheets: StoryAnalysis, StoryIndexed, StoryRead, Inf_story_read, Survey, InfForm, Users, InfUs, frelevance_trec_eval_corpusEmo]
